# Supplementary material for: Ligand-coupled conformational changes in a cyclic nucleotide-gated ion channel revealed by time-resolved transition metal ion FRET
Source: eLife. 2024 Dec 10;13:RP99854. doi: 10.7554/eLife.99854 (PMC11630820; doi:10.7554/eLife.99854)
Supplement: Figure 4—source data 1. [file elife-99854-fig4-data1.xlsx]

## Sheet: Figure4
Distance (r), Å	361Acd_FePhenM_Apo_AA1	361Acd_FePhenM_Apo_AB1	361Acd_FePhenM_Apo_AC1	361Acd_FePhenM_Apo_AD1	361Acd_FePhenM_cAMP_AA1	361Acd_FePhenM_cAMP_AB1	361Acd_FePhenM_cAMP_AC1	361Acd_FePhenM_cAMP_AD1			Distance (r), Å	361Acd_RuBpy_Apo_AA	361Acd_RuBpy_Apo_AB	361Acd_RuBpy_Apo_AC	361Acd_RuBpy_Apo_AD	361Acd_RuBpy_cAMP_AA	361Acd_RuBpy_cAMP_AB	361Acd_RuBpy_cAMP_AC	361Acd_RuBpy_cAMP_AD			Distance (r), Å	364Acd_CuTETAC_Apo_AA1	364Acd_CuTETAC_Apo_AB1	364Acd_CuTETAC_Apo_AC1	364Acd_CuTETAC_Apo_AD1	364Acd_CuTETAC_cAMP_AA1	364Acd_CuTETAC_cAMP_AB1	364Acd_CuTETAC_cAMP_AC1	364Acd_CuTETAC_cAMP_AD1
0	0	0	0	0	0	0	0	0			0	0	0	0	0	0	0	0	0			0	0	0	0	0	1.2941e-07	0	0	0
0.392157	0	0	0	0	0	0	0	0			0.392157	0	0	0	0	0	0	0	0			0.392157	0	0	0	0	6.63505e-07	0	0	0
0.784314	0	0	0	0	0	0	0	0			0.784314	0	0	0	0	0	0	0	0			0.784314	0	0	0	0	2.48383e-06	0	0	0
1.17647	0	0	0	0	0	0	0	0			1.17647	0	0	0	0	0	0	0	0			1.17647	0	0	0	0	7.84933e-06	0	0	0
1.56863	0	0	0	0	0	0	0	0			1.56863	0	0	0	0	0	0	0	0			1.56863	0	0	0	0	2.18938e-05	0	0	0
1.96078	0	0	0	0	0	0	0	0			1.96078	0	0	0	0	0	0	0	0			1.96078	0	0	0	0	5.4449e-05	0	0	0
2.35294	0	0	0	0	0	0	0	0			2.35294	0	0	0	0	0	0	0	0			2.35294	0	0	0	0	0.000122575	0	0	0
2.7451	0	0	0	0	0	0	0	0			2.7451	0	0	0	0	0	0	0	0			2.7451	0	0	0	0	0.000252753	0	0	0
3.13725	0	0	0	0	0	0	0	0			3.13725	0	0	0	0	0	0	0	0			3.13725	0	0	0	0	0.000482546	0	0	0
3.52941	0	0	0	0	0	0	0	0			3.52941	0	0	0	0	0	0	0	0			3.52941	0	0	0	0	0.000860944	0	0	0
3.92157	0	0	0	0	0	0	0	0			3.92157	0	0	0	0	0	0	0	0			3.92157	0	0	0	0	0.00144807	0	0	0
4.31373	0	0	0	0	0	0	0	0			4.31373	0	0	0	0	0	0	0	0			4.31373	0	0	0	0	0.00231192	0	0	0
4.70588	0	0	0	0	0	0	0	0			4.70588	0	0	0	0	0	0	0	0			4.70588	0	0	0	0	0.00352615	0	0	0
5.09804	0	0	0	0	0	0	0	0			5.09804	0	0	0	0	0	0	0	0			5.09804	0	0	0	0	0.00516662	0	0	0
5.4902	0	0	0	0	0	0	0	0			5.4902	0	0	0	0	0	0	0	0			5.4902	0	0	0	0	0.00731034	0	0	0
5.88235	0	0	0	0	0	0	0	0			5.88235	0	0	0	0	0	0	0	0			5.88235	0	0	0	0	0.0100316	0	0	0
6.27451	0	0	0	0	0	0	0	0			6.27451	0	0	0	0	0	0	0	0			6.27451	0	0	0	0	0.0133988	0	0	0
6.66667	0	0	0	0	0	0	0	0			6.66667	0	0	0	0	0	0	0	0			6.66667	1.69913e-10	0	0	0	0.0174621	0	0	0
7.05882	0	0	0	0	0	0	0	0			7.05882	0	0	0	0	0	0	0	0			7.05882	6.67174e-09	0	0	0	0.0222427	0	0	0
7.45098	0	0	0	0	0	0	0	0			7.45098	0	0	0	0	0	0	0	0			7.45098	4.94392e-08	0	0	0	0.0277179	0	0	0
7.84314	0	0	0	0	0	0	0	0			7.84314	0	0	0	0	0	0	0	0			7.84314	2.26714e-07	0	0	0	0.0338132	0	0	0
8.23529	0	0	0	0	0	0	0	0			8.23529	0	0	0	0	0	0	0	0			8.23529	8.35651e-07	0	0	0	0.0404009	0	0	0
8.62745	0	0	0	0	0	0	0	0			8.62745	0	0	0	0	0	0	0	0			8.62745	2.64756e-06	0	0	0	0.047317	0	0	0
9.01961	0	0	0	0	0	0	0	0			9.01961	0	0	0	0	0	0	0	0			9.01961	7.37874e-06	0	0	0	0.0543907	0	0	0
9.41176	0	0	0	0	0	0	0	0			9.41176	0	0	0	0	0	0	0	0			9.41176	1.8473e-05	0	0	0	0.0614784	0	0	0
9.80392	0	0	0	0	0	0	0	0			9.80392	0	0	0	0	0	0	0	0			9.80392	4.20582e-05	0	0	0	0.0684817	0	0	0
10.1961	0	0	0	0	0	0	0	0			10.1961	0	0	0	0	0	0	0	0			10.1961	8.80281e-05	0	0	0	0.0753428	0	0	0
10.5882	0	0	0	0	0	0	0	0			10.5882	0	0	0	0	0	0	0	0			10.5882	0.000170894	0	0	0	0.0820247	0	0	0
10.9804	0	0	0	0	0	0	0	0			10.9804	0	0	0	0	0	0	0	0			10.9804	0.000309989	0	0	0	0.0884921	0	0	0
11.3725	0	0	0	0	0	0	0	0			11.3725	0	0	0	0	0	0	0	0			11.3725	0.000529388	0	0	0	0.0946931	0	0	0
11.7647	0	0	0	0	0	0	0	0			11.7647	0	0	0	0	0	0	0	0			11.7647	0.000857429	0	0	0	0.10054	0	0	0
12.1569	0	0	0	0	0	0	0	0			12.1569	0	0	0	0	0	0	0	0			12.1569	0.00132681	0	0	0	0.105892	0	0	0
12.549	0	0	0	0	0	0	0	0			12.549	0	0	0	0	0	0	0	0			12.549	0.00197491	0	0	0	0.110553	0	0	0
12.9412	0	0	0	0	0	0	0	0			12.9412	0	0	0	0	0	0	0	0			12.9412	0.00284433	0	0	0	0.114285	0	0	0
13.3333	0	0	0	0	0	0	0	0			13.3333	0	0	0	0	0	0	0	0			13.3333	0.0039822	0	0	0	0.116845	0	0	0
13.7255	0	0	0	0	0	0	0	0			13.7255	0	0	0	0	0	0	0	0			13.7255	0.00543811	0	0	0	0.118008	0	0	0
14.1176	0	0	0	0	0	0	0	0			14.1176	0	0	0	0	0	0	0	0			14.1176	0.00726116	0	0	0	0.117596	0	0	0
14.5098	0	0	0	0	0	0	0	0			14.5098	0	0	0	0	0	0	0	0			14.5098	0.00949613	0	0	0	0.115511	0	0	0
14.902	0	0	0	0	0	0	0	0			14.902	0	0	0	0	0	0	0	0			14.902	0.0121783	0	0	0	0.111753	0	0	0
15.2941	0	0	0	0	0	0	0	0			15.2941	0	0	0	0	0	0	0	0			15.2941	0.0153267	0	0	0	0.106424	0	0	0
15.6863	0	0	0	0	0	0	0	0			15.6863	0	0	0	0	0	0	0	0			15.6863	0.0189361	0	0	0	0.0997161	0	0	0
16.0784	0	0	0	0	0	0	0	0			16.0784	0	0	0	0	0	0	0	0			16.0784	0.0229709	0	0	0	0.0918817	0	0	0
16.4706	0	0	0	0	0	0	0	0			16.4706	0	0	0	0	0	0	0	0			16.4706	0.0273643	0	0	0	0.0832164	0	0	0
16.8627	0	0	0	0	0	0	0	0			16.8627	0	0	0	0	0	0	0	0			16.8627	0.0320231	0	0	0	0.074042	0	0	0
17.2549	0	0	0	0	0	0	0	0			17.2549	0	0	0	0	1.0223e-10	0	0	0			17.2549	0.0368401	0	0	0	0.0646892	0	0	0
17.6471	0	0	0	0	0	0	0	0			17.6471	0	0	0	0	5.13352e-09	0	0	0			17.6471	0.0417088	0	0	0	0.055473	0	0	0
18.0392	0	0	0	0	6.03471e-09	0	0	0			18.0392	0	0	0	0	5.2507e-08	0	0	0			18.0392	0.046539	0	0	0	0.0466667	0	0	0
18.4314	0	0	0	0	8.32212e-08	0	0	0			18.4314	0	0	0	0	3.12305e-07	0	0	0			18.4314	0.0512675	0	0	0	0.0384836	0	0	0
18.8235	0	0	0	0	5.37945e-07	0	0	0			18.8235	0	0	0	0	1.32035e-06	0	0	0			18.8235	0.0558602	0	0	0	0.031074	0	0	0
19.2157	0	0	0	0	2.57291e-06	0	0	0			19.2157	0	0	0	0	4.70221e-06	0	0	0			19.2157	0.0603052	0	0	0	0.0245321	0	0	0
19.6078	0	0	0	0	9.66579e-06	0	0	0			19.6078	0	0	0	0	1.45057e-05	0	0	0			19.6078	0.0645971	0	0	0	0.0189042	0	0	0
20	0	0	0	0	3.01522e-05	0	0	0			20	0	0	0	0	3.96399e-05	0	0	0			20	0.0687248	0	0	0	0.0141927	0	0	0
20.3922	0	0	0	0	8.19135e-05	0	0	0			20.3922	0	0	0	0	9.74146e-05	0	0	0			20.3922	0.0726652	0	0	0	0.0103602	0	0	0
20.7843	0	0	0	0	0.00019796	0	0	0			20.7843	0	0	0	0	0.000217732	0	0	0			20.7843	0.076384	0	0	0	0.00733486	0	0	0
21.1765	0	0	0	0	0.000430387	0	0	0			21.1765	0	0	0	0	0.00044726	0	0	0			21.1765	0.0798384	0	0	0	0.00502139	0	0	0
21.5686	0	0	0	0	0.000846639	0	0	0			21.5686	0	0	0	0	0.000850129	0	0	0			21.5686	0.0829737	0	0	0	0.00331162	0	0	0
21.9608	0	0	0	0	0.00151891	0	0	0			21.9608	0	0	0	0	0.00150552	0	0	0			21.9608	0.0857207	0	0	0	0.0020947	0	0	0
22.3529	0	0	0	0	0.00250823	0	0	0			22.3529	0	0	0	0	0.00250343	0	0	0			22.3529	0.0879981	0	0	0	0.00126452	0	0	0
22.7451	0	0	0	0	0.00386033	0	0	0			22.7451	0	0	0	0	0.00394765	0	0	0			22.7451	0.0897232	0	0	0	0.000724665	0	0	0
23.1373	0	0	0	0	0.00562225	0	0	0			23.1373	8.50957e-11	0	0	0	0.00596087	0	0	0			23.1373	0.0908259	0	0	0	0.000392041	0	0	0
23.5294	0	0	0	0	0.00787296	0	0	0			23.5294	1.69679e-09	0	0	0	0.00868327	0	0	0			23.5294	0.0912591	0	0	0	0.000198976	0	0	0
23.9216	4.73931e-11	0	0	0	0.0107472	0	0	0			23.9216	1.68733e-08	0	0	0	0.0122465	0	0	0			23.9216	0.0910029	0	0	0	9.41381e-05	0	0	0
24.3137	1.56096e-09	0	0	0	0.014422	0	0	0			24.3137	1.17167e-07	0	0	0	0.0167061	0	0	0			24.3137	0.0900645	0	0	0	4.11917e-05	0	0	0
24.7059	1.82119e-08	0	0	0	0.0190694	0	0	0			24.7059	5.84202e-07	0	0	0	0.0219754	0	0	0			24.7059	0.0884754	0	0	0	1.65245e-05	0	0	0
25.098	1.29521e-07	0	0	0	0.0248075	0	0	0			25.098	2.03919e-06	0	0	0	0.0278191	0	0	0			25.098	0.086284	0	0	0	6.01035e-06	0	0	0
25.4902	6.43943e-07	0	0	0	0.0316948	0	0	0			25.4902	6.04152e-06	0	0	0	0.0339698	0	0	0			25.4902	0.0835456	0	0	0	1.95061e-06	0	0	0
25.8824	2.71264e-06	0	0	0	0.0397831	0	0	0			25.8824	1.57045e-05	0	0	0	0.0403408	0	0	0			25.8824	0.080314	0	0	0	5.52082e-07	0	0	0
26.2745	9.00612e-06	0	0	0	0.0492085	0	0	0			26.2745	3.62942e-05	0	0	0	0.0472473	0	0	0			26.2745	0.0766392	0	0	0	1.31327e-07	0	0	0
26.6667	2.56025e-05	0	0	0	0.0602649	0	0	0			26.6667	7.52892e-05	0	0	0	0.0554959	0	0	0			26.6667	0.0725701	0	0	0	2.30775e-08	0	0	0
27.0588	6.4656e-05	0	0	0	0.0734197	0	0	0			27.0588	0.000141475	0	0	0	0.0662863	0	0	0			27.0588	0.0681581	0	0	0	2.34326e-09	0	0	0
27.451	0.000146103	0	0	0	0.089232	0	0	0			27.451	0.000244098	0	0	0	0.0809135	0	0	0			27.451	0.0634583	0	0	0	0	0	0	0
27.8431	0.000297552	0	0	0	0.108149	0	0	0			27.8431	0.000393313	0	0	0	0.10035	0	0	0			27.8431	0.0585299	0	0	0	0	0	0	0
28.2353	0.000548721	0	0	0	0.130165	0	0	0			28.2353	0.000603325	0	0	0	0.124747	0	0	0			28.2353	0.0534372	0	0	0	0	0	0	0
28.6275	0.000923932	0	0	0	0.154405	0	0	0			28.6275	0.000896422	0	0	0	0.152942	0	0	0			28.6275	0.0482499	0	0	0	0	0	0	0
29.0196	0.0014352	0	0	0	0.178787	0	0	0			29.0196	0.00130194	0	0	0	0.182111	0	0	0			29.0196	0.0430437	0	0	0	0	0	0	0
29.4118	0.00208307	0	0	0	0.200028	0	0	0			29.4118	0.0018519	0	0	0	0.207856	0	0	0			29.4118	0.037899	0	0	0	0	0	0	0
29.8039	0.00286517	0	0	0	0.214196	0	0	0			29.8039	0.00257288	0	0	0	0.224999	0	0	0			29.8039	0.032898	0	0	0	0	0	0	0
30.1961	0.00378533	0	0	0	0.217769	0	0	0			30.1961	0.00348457	0	0	0	0.229064	0	0	0			30.1961	0.0281193	0	0	0	0	0	0	0
30.5882	0.00485911	0	0	0	0.208835	0	0	0			30.5882	0.00460588	0	0	0	0.217941	0	0	0			30.5882	0.0236316	0	0	0	0	0	0	0
30.9804	0.00611786	0	0	0	0.187908	0	0	0			30.9804	0.00596907	0	0	0	0.192911	0	0	0			30.9804	0.0194878	0	0	0	0	0	0	0
31.3725	0.00761867	0	0	0	0.157967	0	0	0			31.3725	0.00763235	0	0	0	0.158383	0	0	0			31.3725	0.0157256	0	0	0	0	0	0	0
31.7647	0.00945755	0	0	0	0.123639	0	0	0			31.7647	0.00968517	0	0	0	0.120412	0	0	0			31.7647	0.0123719	0	0	0	0	0	0	0
32.1569	0.0117637	0	0	0	0.0898539	0	0	0			32.1569	0.0122415	0	0	0	0.0847298	0	0	0			32.1569	0.00944827	0	0	0	0	0	0	0
32.549	0.0146639	0	0	0	0.0605252	0	0	0			32.549	0.0154115	0	0	0	0.0552162	0	0	0			32.549	0.00697058	0	0	0	0	0	0	0
32.9412	0.0182181	0	0	0	0.0377622	0	0	0			32.9412	0.0192501	0	0	0	0.0333809	0	0	0			32.9412	0.00494334	0	0	0	0	0	0	0
33.3333	0.02237	0	0	0	0.021838	0	0	0			33.3333	0.023699	0	0	0	0.0187776	0	0	0			33.3333	0.00335268	0	0	0	0	0	0	0
33.7255	0.026959	0	0	0	0.0117343	0	0	0			33.7255	0.0285777	0	0	0	0.00987456	0	0	0			33.7255	0.00216308	0	0	0	0	0	0	0
34.1176	0.0317905	0	0	0	0.00588593	0	0	0			34.1176	0.0336558	0	0	0	0.00488882	0	0	0			34.1176	0.00132001	0	0	0	0	0	0	0
34.5098	0.0367343	0	0	0	0.00277608	0	0	0			34.5098	0.0387797	0	0	0	0.00230074	0	0	0			34.5098	0.000757119	0	0	0	0	0	0	0
34.902	0.0417718	0	0	0	0.00124291	0	0	0			34.902	0.0439538	0	0	0	0.00104241	0	0	0			34.902	0.000405368	0	0	0	0	0	0	0
35.2941	0.0469825	0	0	0	0.000533758	0	0	0			35.2941	0.0493062	0	0	0	0.000459961	0	0	0			35.2941	0.000201123	0	0	0	0	0	0	0
35.6863	0.0524838	0	0	0	0.000222681	0	0	0			35.6863	0.0549622	0	0	0	0.000199183	0	0	0			35.6863	9.17573e-05	0	0	0	0	0	0	0
36.0784	0.0583707	0	0	0	9.0639e-05	0	0	0			36.0784	0.0609336	0	0	0	8.41233e-05	0	0	0			36.0784	3.81855e-05	0	0	0	0	0	0	0
36.4706	0.0646821	0	0	0	3.57417e-05	0	0	0			36.4706	0.0671203	0	0	0	3.41031e-05	0	0	0			36.4706	1.43477e-05	0	0	0	0	0	0	0
36.8627	0.0714027	0	0	0	1.33933e-05	0	0	0			36.8627	0.0734171	0	0	0	1.3078e-05	0	0	0			36.8627	4.80722e-06	0	0	0	0	0	0	0
37.2549	0.0785152	0	0	0	4.67312e-06	0	0	0			37.2549	0.0798275	0	0	0	4.60328e-06	0	0	0			37.2549	1.40002e-06	0	0	0	0	0	0	0
37.6471	0.0860625	0	0	4.35739e-11	1.47149e-06	0	0	0			37.6471	0.0864979	0	0	2.89706e-10	1.44276e-06	0	0	0			37.6471	3.38996e-07	0	0	0	0	0	0	0
38.0392	0.0941818	0	0	5.22545e-10	4.00145e-07	0	0	0			38.0392	0.0936617	0	0	2.47335e-09	3.82864e-07	0	0	0			38.0392	6.23289e-08	0	0	0	0	0	0	0
38.4314	0.103069	0	0	4.18382e-09	8.13387e-08	0	0	0			38.4314	0.101548	0	0	1.28868e-08	7.89856e-08	0	0	0			38.4314	7.70484e-09	0	0	0	0	0	0	0
38.8235	0.112859	0	0	2.27244e-08	9.2858e-09	0	0	0			38.8235	0.110284	0	0	5.29302e-08	9.77038e-09	0	0	0			38.8235	4.45976e-10	0	0	1.38859e-11	0	0	0	0
39.2157	0.123463	0	0	9.02243e-08	0	0	0	0			39.2157	0.119846	0	0	1.7893e-07	3.0319e-10	0	0	0			39.2157	0	0	0	2.81654e-09	0	0	0	0
39.6078	0.134431	0	0	2.92325e-07	0	0	0	0			39.6078	0.129979	0	0	5.34537e-07	0	0	0	0			39.6078	0	0	0	4.42444e-08	0	0	0	0
40	0.14486	0	0	8.22926e-07	0	0	0	0			40	0.14007	0	0	1.42295e-06	0	0	0	0			40	0	0	0	2.09519e-07	0	0	0	0
40.3922	0.153371	0	0	2.05494e-06	0	0	0	0			40.3922	0.148959	0	0	3.42328e-06	0	0	0	0			40.3922	0	0	0	7.30732e-07	0	0	0	0
40.7843	0.158201	0	0	4.62065e-06	0	0	0	0			40.7843	0.15485	0	0	7.53321e-06	0	0	0	0			40.7843	0	0	0	2.17192e-06	0	0	0	0
41.1765	0.157476	0	0	9.49085e-06	0	0	0	0			41.1765	0.155566	0	0	1.54448e-05	0	0	0	0			41.1765	0	0	0	5.62457e-06	0	0	0	0
41.5686	0.149745	0	0	1.8321e-05	0	0	0	0			41.5686	0.149223	0	0	3.0076e-05	0	0	0	0			41.5686	0	0	0	1.28805e-05	0	0	0	0
41.9608	0.134664	0	0	3.43244e-05	0	0	0	0			41.9608	0.135135	0	0	5.69493e-05	0	0	0	0			41.9608	0	0	0	2.64757e-05	0	0	0	0
42.3529	0.113483	0	0	6.4591e-05	0	0	0	0			42.3529	0.114426	0	0	0.000107099	0	0	0	0			42.3529	0	0	0	4.9452e-05	0	0	0	0
42.7451	0.0889504	0	0	0.00012469	0	0	0	0			42.7451	0.0899267	1.0053e-10	0	0.000204954	0	0	0	0			42.7451	0	1.18345e-11	0	8.5361e-05	0	0	0	0
43.1373	0.0645247	1.60883e-11	0	0.000246892	0	0	0	0			43.1373	0.0652804	4.05286e-09	0	0.000399741	0	0	0	0			43.1373	0	7.22573e-10	0	0.000138938	0	0	0	0
43.5294	0.0432521	1.98418e-09	0	0.000489363	0	0	0	0			43.5294	0.0437168	3.04519e-08	0	0.000780675	0	0	0	0			43.5294	0	6.39492e-09	0	0.000217742	0	0	0	0
43.9216	0.0268966	1.92778e-08	0	0.000941851	0	0	0	0			43.9216	0.0271164	2.22343e-07	0	0.00149008	0	0	0	0			43.9216	0	3.71852e-08	0	0.000334223	0	0	0	0
44.3137	0.0157252	1.48182e-07	0	0.00171788	0	0	0	0			44.3137	0.0157844	1.10099e-06	0	0.00272299	0	0	0	0			44.3137	0	1.64419e-07	0	0.000507619	0	0	0	0
44.7059	0.00890343	8.27322e-07	0	0.00293191	0	0	0	0			44.7059	0.00887822	3.96498e-06	0	0.00469371	0	0	0	0			44.7059	0	5.89939e-07	0	0.000764747	0	0	0	0
45.098	0.00514964	3.28752e-06	0	0.00466425	0	0	0	0			45.098	0.00509036	1.21474e-05	0	0.00756637	0	0	0	0			45.098	0	1.83657e-06	0	0.00114007	0	0	0	0
45.4902	0.00326205	1.06506e-05	0	0.00692627	0	0	0	0			45.4902	0.00319709	3.27607e-05	0	0.011365	0	0	0	0			45.4902	0	5.08831e-06	0	0.00167564	0	0	0	0
45.8824	0.00236366	3.00396e-05	0	0.00964988	0	0	5.81196e-10	0			45.8824	0.00230667	7.88233e-05	0	0.015903	0	0	0	0			45.8824	0	1.27642e-05	0	0.00242132	0	0	0	0
46.2745	0.00191778	7.56516e-05	0	0.012712	0	0	5.46879e-09	0			46.2745	0.00187552	0.000170995	0	0.0207899	0	0	0	0			46.2745	0	2.93677e-05	0	0.0034334	0	0	0	0
46.6667	0.00163588	0.000171329	0	0.0159787	0	1.88974e-09	3.1477e-08	0			46.6667	0.00160802	0.000337961	0	0.0255436	0	1.47814e-10	1.85212e-09	0			46.6667	0	6.25539e-05	0	0.00476967	0	0	0	0
47.0588	0.00138226	0.000352839	0	0.0193499	0	1.41159e-08	1.34944e-07	0			47.0588	0.00136498	0.000615053	0	0.029763	0	7.73015e-09	1.82832e-08	0			47.0588	0	0.000124523	0	0.0064813	0	0	0	0
47.451	0.0011117	0.000666924	0	0.0227797	0	8.96679e-08	4.55587e-07	0			47.451	0.00109935	0.00104321	0	0.0332629	0	1.5381e-07	1.13526e-07	0			47.451	0	0.000233789	0	0.00860646	0	0	0	0
47.8431	0.000830681	0.00117089	0	0.0262543	0	4.78237e-07	1.3173e-06	0			47.8431	0.000819167	0.00166845	0	0.0360895	0	7.5081e-07	5.49072e-07	0			47.8431	0	0.000417331	0	0.0111706	0	5.93718e-10	2.25656e-10	0
48.2353	0.000567819	0.00193022	0	0.02974	0	2.13037e-06	3.38579e-06	0			48.2353	0.000556176	0.00254294	0	0.0384166	0	2.80931e-06	2.0971e-06	0			48.2353	0	0.000713012	0	0.0141962	0	8.82346e-09	2.45427e-08	0
48.6275	0.000351291	0.00301362	0	0.0331423	0	7.58773e-06	7.80966e-06	0			48.6275	0.000340632	0.00372424	0	0.0404058	0	9.6473e-06	6.79455e-06	0			48.6275	0	0.00117185	0	0.0177172	0	5.33343e-08	1.65824e-07	0
49.0196	0.000195142	0.00448486	0	0.0363019	0	2.34767e-05	1.64763e-05	0			49.0196	0.000186817	0.00527179	0	0.0421358	0	2.84756e-05	1.91143e-05	0			49.0196	0	0.00186015	0	0.0217844	0	2.34679e-07	7.25765e-07	0
49.4118	9.67228e-05	0.00638704	0	0.0390241	0	6.41627e-05	3.21439e-05	0			49.4118	9.12391e-05	0.00724095	0	0.0436446	0	7.66084e-05	4.76911e-05	0			49.4118	0	0.00286003	0	0.026456	0	8.84129e-07	2.52572e-06	0
49.8039	4.25348e-05	0.0087286	0	0.0411302	0	0.000157806	5.89652e-05	0			49.8039	3.94873e-05	0.00967339	0	0.0450266	0	0.000186654	0.000107246	0			49.8039	0	0.00426967	0	0.0317762	0	2.8629e-06	7.44645e-06	0
50.1961	1.6489e-05	0.011479	0	0.0425238	0	0.000353628	0.000103424	0			50.1961	1.50436e-05	0.0125836	0	0.0464863	0	0.000419051	0.000218328	0			50.1961	0	0.00620105	0	0.0377563	0	8.23179e-06	1.95126e-05	0
50.5882	5.57228e-06	0.0145799	0	0.0432695	0	0.000725925	0.000176376	0			50.5882	4.97835e-06	0.0159467	0	0.0482644	0	0.000872225	0.000404764	0			50.5882	0	0.00877675	0	0.0443679	0	2.14925e-05	4.59144e-05	0
50.9804	1.5773e-06	0.0179633	0	0.0436544	0	0.00137724	0.000294562	0			50.9804	1.3595e-06	0.0196922	0	0.0504792	0	0.00168715	0.000687421	0			50.9804	0	0.0121226	0	0.0515451	0	5.13795e-05	9.82058e-05	0
51.3725	3.2784e-07	0.0215674	0	0.0441547	0	0.00243414	0.00048045	0			51.3725	2.65766e-07	0.0237154	0	0.0530111	0	0.00303888	0.00107836	0			51.3725	0	0.016361	0	0.0591857	0	0.000113542	0.000193723	0
51.7647	3.78815e-08	0.0253414	0	0.045261	0	0.00404332	0.000758606	0			51.7647	2.78735e-08	0.0279076	0	0.0555301	0	0.00510455	0.0015805	0			51.7647	0	0.0216006	0	0.0671494	0	0.000233762	0.000357853	0
52.1569	7.50897e-10	0.0292384	0	0.0472303	0	0.00635693	0.00114978	0			52.1569	0	0.0321849	0	0.0576579	0	0.00802145	0.00219447	0			52.1569	0	0.0279253	0	0.0752579	0	0.000451431	0.000627731	0
52.549	0	0.0331938	0	0.0499229	0	0.00950171	0.00166712	0			52.549	0	0.0364969	0	0.0591456	0	0.0118533	0.00293108	0			52.549	0	0.0353795	0	0.0833055	0	0.000822868	0.0010593	0
52.9412	0	0.0371014	0	0.0528544	0	0.0135272	0.00231823	0			52.9412	0	0.0408011	4.50517e-11	0.0599634	0	0.0165864	0.00381809	0			52.9412	0	0.043951	0	0.0910761	0	0.00142492	0.00173723	0
53.3333	0	0.0408098	1.15804e-10	0.0554626	0	0.0183546	0.00311682	0			53.3333	0	0.0450282	9.81061e-10	0.0602841	0	0.0221563	0.00489398	0			53.3333	0	0.053555	0	0.0983605	0	0.0023587	0.00278708	0
53.7255	0	0.0441584	2.70871e-09	0.0574314	0	0.0237805	0.00409868	0			53.7255	0	0.0490663	5.26887e-09	0.0603997	0	0.0284769	0.00619384	0			53.7255	0	0.0640246	0	0.104962	0	0.00375431	0.00438557	0
54.1176	0	0.0470451	1.46716e-08	0.0588519	0	0.0295613	0.00533518	0			54.1176	0	0.0527731	2.15499e-08	0.0606192	0	0.0354418	0.00773397	0			54.1176	0	0.0751082	0	0.110691	0	0.00577567	0.00676096	0
54.5098	0	0.049491	5.59429e-08	0.06011	0	0.0355505	0.00693381	0			54.5098	0	0.0560039	7.4012e-08	0.0611664	0	0.0429035	0.00951412	0			54.5098	0	0.0864752	0	0.115357	0	0.00862007	0.0101814	0
54.902	0	0.0516443	1.76528e-07	0.0616025	0	0.0417773	0.00902078	0			54.902	0	0.0586459	2.18409e-07	0.0621086	0	0.0506525	0.0115281	0			54.902	0	0.0977283	0	0.118768	0	0.0125082	0.0149247	0
55.2941	0	0.0537079	4.92169e-07	0.0634743	0	0.0483722	0.0117013	0			55.2941	0	0.0606541	5.70428e-07	0.0633392	0	0.0584433	0.013781	0			55.2941	0	0.108421	0	0.12075	0	0.0176572	0.0212365	0
55.6863	0	0.0558236	1.25313e-06	0.0655558	0	0.0553716	0.015008	0			55.6863	0	0.0620808	1.41821e-06	0.0646386	0	0.0660467	0.0162959	0			55.6863	0	0.118092	0	0.121174	0	0.0242447	0.0292862	0
56.0784	0	0.0579897	3.19263e-06	0.0675174	0	0.0625555	0.0188717	0			56.0784	0	0.0630697	3.41446e-06	0.0657946	0	0.0732802	0.0191102	0			56.0784	0	0.126306	0	0.119975	0	0.0323663	0.0391238	0
56.4706	0	0.0600697	8.07258e-06	0.0691106	0	0.069485	0.0231395	0			56.4706	0	0.0638178	8.26158e-06	0.0667001	0	0.0799707	0.0222683	0			56.4706	0	0.132701	0	0.117164	0	0.0420038	0.0506443	0
56.8627	0	0.0618979	1.9855e-05	0.0703227	0	0.0757328	0.0276532	0			56.8627	0	0.0645309	1.97152e-05	0.06736	0	0.0858957	0.0258186	0			56.8627	0	0.137017	0	0.112813	0	0.0530053	0.0635692	0
57.2549	0	0.0634097	4.71576e-05	0.0713403	0	0.0811179	0.032344	0			57.2549	0	0.0654084	4.60189e-05	0.0678087	0	0.0907943	0.0298145	0			57.2549	0	0.13911	0	0.10705	0	0.0650831	0.0774598	0
57.6471	0	0.0647112	0.000107104	0.0723907	0	0.0857602	0.0372816	0			57.6471	0	0.0666402	0.000103132	0.0680195	0	0.0944932	0.0343049	0			57.6471	0	0.138951	0	0.100043	0	0.0778234	0.0917706	0
58.0392	0	0.0660288	0.000227741	0.0735838	0	0.0899196	0.0426276	0			58.0392	0	0.06837	0.000218037	0.0679075	0	0.0970719	0.0393119	0			58.0392	0	0.136609	0	0.0919971	0	0.0907199	0.105919	0
58.4314	0	0.0675696	0.000447982	0.0748377	0	0.0937681	0.0485186	0			58.4314	0	0.0706201	0.000430656	0.0674093	0	0.0988989	0.0448007	0			58.4314	0	0.132217	0	0.0831426	0	0.103229	0.119345	0
58.8235	0	0.0693856	0.000811102	0.0759007	0	0.0972643	0.0549502	0			58.8235	0	0.0732394	0.000788068	0.0665411	0	0.100461	0.0506569	0			58.8235	0	0.125925	0	0.0737342	0	0.114834	0.131543	0
59.2157	0	0.0713416	0.00135584	0.0764332	0	0.100206	0.0617542	0			59.2157	0	0.0759513	0.00133624	0.0653745	0	0.10208	0.0567051	0			59.2157	0	0.11788	0	0.0640439	0	0.1251	0.142069	0
59.6078	0	0.0732186	0.0021109	0.0761276	0	0.1024	0.0686702	0			59.6078	0	0.0784845	0.00211554	0.0639635	0	0.103721	0.0627715	0			59.6078	0	0.108233	0	0.0543566	0	0.13369	0.150535	0
60	0	0.0748877	0.0031011	0.0748232	0	0.103799	0.075453	0			60	0	0.0806935	0.00316837	0.0623295	0	0.105038	0.068793	0			60	0	0.097189	0	0.0449615	0	0.140353	0.156584	0
60.3922	0	0.0764512	0.00436023	0.072564	0	0.104517	0.081943	0			60.3922	0	0.0825814	0.00455687	0.0605192	0	0.105608	0.0748894	0			60.3922	0	0.085059	0	0.0361371	0	0.144897	0.15986	0
60.7843	0	0.0782495	0.00593837	0.0695677	0	0.104699	0.0880612	0			60.7843	0	0.0842226	0.00637477	0.0586497	0	0.10516	0.0813297	0			60.7843	0	0.0722872	0	0.0281288	0	0.147156	0.159995	0
61.1765	0	0.0807022	0.0078961	0.066131	0	0.104372	0.0937802	0			61.1765	0	0.0856592	0.00872901	0.0568573	0	0.103639	0.0883603	0			61.1765	0	0.0594239	0	0.0211258	0	0.146986	0.156654	0
61.5686	0	0.0840325	0.0102772	0.0625268	0	0.103394	0.0991079	0			61.5686	0	0.0868248	0.0116872	0.055167	0	0.101102	0.0959753	0			61.5686	0	0.0470598	0	0.0152424	0	0.144273	0.149628	0
61.9608	0	0.0880213	0.013081	0.05892	0	0.101531	0.104082	0			61.9608	0	0.0875138	0.0152188	0.0533864	0	0.0975766	0.103749	0			61.9608	0	0.0357459	0	0.0105114	0	0.13896	0.138965	0
62.3529	0	0.091953	0.0162498	0.0553121	0	0.0985854	0.108714	0			62.3529	0	0.0874	0.0191785	0.051105	0	0.0930132	0.11087	0			62.3529	0	0.0259222	6.92158e-10	0.00688761	0	0.131087	0.125064	0
62.7451	0	0.0948076	0.0196765	0.0515351	0	0.0944834	0.112874	0			62.7451	0	0.08612	0.0233453	0.0478314	0	0.087351	0.116394	0			62.7451	0	0.0178626	6.68244e-09	0.00425943	0	0.120836	0.108687	0
63.1373	0	0.095614	0.023231	0.0472924	0	0.0892681	0.116171	0			63.1373	0	0.0834109	0.0274834	0.0432096	0	0.0806234	0.119597	0			63.1373	0	0.0116426	3.31899e-08	0.00246772	0	0.108566	0.0908858	0
63.5294	0	0.0937662	0.0267866	0.0422669	0	0.08305	0.11797	0			63.5294	0	0.0792284	0.0313882	0.0372179	0	0.0730028	0.120248	0			63.5294	0	0.00714617	1.3483e-07	0.00132888	0	0.0948168	0.0728573	0
63.9216	0	0.0891526	0.0302379	0.0362901	0	0.075957	0.117608	0			63.9216	0	0.0737404	0.034901	0.0302463	0	0.0647661	0.118655	0			63.9216	0	0.00411165	4.50886e-07	0.000659745	0	0.0802695	0.0557682	0
64.3137	0	0.0820671	0.0335049	0.0295052	0	0.0681203	0.114735	0			64.3137	0	0.0671884	0.0379103	0.0229987	0	0.0562201	0.115489	0			64.3137	0	0.0022054	1.32388e-06	0.000299427	0	0.0656801	0.0405829	0
64.7059	0	0.0730153	0.0365257	0.0224154	0	0.059699	0.109553	0			64.7059	0	0.059732	0.0403685	0.0162568	0	0.0476572	0.111488	0			64.7059	0	0.00109523	3.47855e-06	0.000123077	0	0.0517887	0.027938	0
65.098	0	0.0625647	0.0392644	0.0157382	0	0.0509178	0.102816	0			65.098	0	0.0514382	0.0423288	0.0106307	0	0.0393499	0.107183	0			65.098	0	0.000499309	8.33348e-06	4.53031e-05	0	0.0392296	0.0180908	0
65.4902	0	0.0513235	0.0417362	0.0101304	0	0.0420955	0.0955389	0			65.4902	0	0.042445	0.0439702	0.00640829	0	0.0315566	0.102691	0			65.4902	0	0.000206567	1.83835e-05	1.46882e-05	0	0.0284551	0.0109461	0
65.8824	0	0.0399884	0.0440129	0.00594906	0	0.0336239	0.0885422	0			65.8824	0	0.0331487	0.0455479	0.00355251	0	0.0245104	0.0976587	0			65.8824	0	7.65614e-05	3.78261e-05	4.0575e-06	0	0.0196964	0.00614344	0
66.2745	0	0.0293394	0.0461866	0.0031812	0	0.0258951	0.0820609	0			66.2745	0	0.0242218	0.0472744	0.00180879	0	0.0183872	0.0914097	0			66.2745	0	2.49589e-05	7.33594e-05	8.97474e-07	0	0.0129638	0.0031725	0
66.6667	0	0.0201115	0.0483063	0.00155134	0	0.019206	0.0756558	0			66.6667	0	0.0164094	0.0492046	0.000845293	0	0.013279	0.0832775	0			66.6667	0	7.04865e-06	0.000135519	1.30852e-07	0	0.00808555	0.00149465	0
67.0588	0	0.0128008	0.0503307	0.000692506	0	0.013699	0.0685089	0			67.0588	0	0.0102462	0.0512191	0.000362428	0	0.00919069	0.0729912	1.09855e-10			67.0588	0	1.61466e-06	0.000240745	6.04971e-09	0	0.00476453	0.000636756	0
67.451	0	0.00753699	0.0521394	0.000283778	0	0.00936741	0.0599444	0			67.451	0	0.00588169	0.0531179	0.000142361	0	0.00605928	0.0608949	5.27297e-09			67.451	0	1.97992e-07	0.00041445	0	0	0.00264655	0.000242796	0
67.8431	0	0.00410071	0.0535894	0.00010662	0	0.00610549	0.0498722	1.21591e-10			67.8431	0	0.0031061	0.0547389	5.12001e-05	0	0.00377665	0.0479103	2.91366e-08			67.8431	0	0	0.000694884	0	0	0.001383	8.16111e-05	0
68.2353	0	0.00206502	0.0545857	3.63699e-05	0	0.00376133	0.0389147	3.45177e-09			68.2353	0	0.00151413	0.0560265	1.67242e-05	0	0.00220648	0.0352579	1.35803e-07			68.2353	0	0	0.00113773	0	0	0.000678382	2.36721e-05	0
68.6275	0	0.000965664	0.0551349	1.12939e-05	0	0.00216827	0.0281644	4.57693e-08			68.6275	0	0.000684249	0.0570374	4.8867e-06	0	0.00119833	0.0240891	5.01811e-07			68.6275	0	0	0.00182035	0	0	0.000311268	5.48598e-06	0
69.0196	0	0.000420685	0.0553661	3.32265e-06	0	0.00115766	0.0187412	2.66503e-07			69.0196	0	0.000287336	0.0579176	1.31412e-06	0	0.000599933	0.0151734	1.64292e-06			69.0196	0	0	0.00284518	0	0	0.00013259	8.46828e-07	0
69.4118	0	0.000170853	0.0555056	9.31376e-07	0	0.000567141	0.0113869	1.18129e-06			69.4118	0	0.000111959	0.0588596	3.37766e-07	0	0.000274903	0.00875545	4.79797e-06			69.4118	0	0	0.00434089	0	0	5.18794e-05	5.85796e-08	0
69.8039	0	6.4446e-05	0.0558176	2.14502e-07	0	0.000252781	0.0062848	4.44064e-06			69.8039	0	4.02518e-05	0.0600335	6.60286e-08	0	0.000114445	0.00460145	1.30873e-05			69.8039	0	0	0.00646031	0	0	1.83863e-05	0	0
70.1961	0	2.25535e-05	0.056538	3.29601e-08	0	0.000101751	0.00313896	1.42213e-05			70.1961	0	1.33979e-05	0.0615005	7.61437e-09	0	4.28724e-05	0.00219159	3.28165e-05			70.1961	0	0	0.00937432	0	0	5.83583e-06	0	0
70.5882	0	7.30501e-06	0.0578079	2.08888e-09	0	3.65296e-05	0.00141415	3.99915e-05			70.5882	0	4.12672e-06	0.063159	4.47411e-10	0	1.42354e-05	0.000941382	7.62466e-05			70.5882	0	0	0.013262	0	0	1.62658e-06	0	0
70.9804	0	2.19213e-06	0.0596369	4.02063e-11	0	1.14867e-05	0.000572973	0.000101018			70.9804	0	1.16369e-06	0.0647931	0	0	4.09978e-06	0.000362763	0.000166071			70.9804	0	0	0.0182979	0	0	3.68378e-07	0	0
71.3725	0	5.78563e-07	0.0618997	0	0	3.02016e-06	0.000208035	0.00023161			71.3725	0	2.63823e-07	0.0662043	0	0	9.66029e-07	0.000124357	0.000339204			71.3725	0	0	0.0246368	0	0	5.44311e-08	0	0
71.7647	0	1.15948e-07	0.0643829	0	0	6.30974e-07	6.64528e-05	0.000485641			71.7647	0	4.05398e-08	0.0673363	0	0	1.78019e-07	3.67978e-05	0.000649518			71.7647	0	0	0.0323998	0	0	0	0	0
72.1569	0	1.50764e-08	0.0668732	0	0	8.77395e-08	1.77771e-05	0.000937102			72.1569	0	6.8107e-10	0.0682865	0	0	2.31369e-08	8.87159e-06	0.00116592			72.1569	0	0	0.0416564	0	0	0	0	0
72.549	0	0	0.0692292	0	0	1.02729e-08	3.98161e-06	0.00167447			72.549	0	0	0.0692108	0	0	2.3076e-09	1.77082e-06	0.00196646			72.549	0	0	0.0524062	0	0	0	0	0
72.9412	0	0	0.0714096	0	0	5.80383e-10	8.48049e-07	0.00279022			72.9412	0	0	0.0702064	0	0	0	3.00658e-07	0.00312876			72.9412	0	0	0.0645584	0	0	0	0	0
73.3333	0	0	0.0734302	0	0	0	1.41946e-07	0.00436908			73.3333	0	0	0.0712649	0	0	0	3.64577e-08	0.00471859			73.3333	0	0	0.0779081	0	0	0	0	0
73.7255	0	0	0.0752797	0	0	0	1.11739e-08	0.0064803			73.7255	0	0	0.0723096	0	0	0	9.6418e-10	0.00678207			73.7255	0	0	0.092122	0	0	0	0	0
74.1176	0	0	0.0768589	0	0	0	0	0.00916421			74.1176	0	0	0.0732725	0	0	0	0	0.0093474			74.1176	0	0	0.106734	0	0	0	0	6.57949e-10
74.5098	0	0	0.0780046	0	0	0	0	0.012414			74.5098	0	0	0.0741273	0	0	0	0	0.0124376			74.5098	0	0	0.121161	0	0	0	0	2.39676e-08
74.902	0	0	0.0785612	0	0	0	0	0.0161407			74.902	0	0	0.0748268	0	0	0	0	0.0160872			74.902	0	0	0.134742	0	0	0	0	2.05523e-07
75.2941	0	0	0.0784362	0	0	0	0	0.0201483			75.2941	0	0	0.0751903	0	0	0	0	0.020347			75.2941	0	0	0.146773	0	0	0	0	1.01619e-06
75.6863	0	0	0.0775876	0	0	0	0	0.0241506			75.6863	0	0	0.0748519	0	0	0	0	0.0252508			75.6863	0	0	0.156542	0	0	0	0	3.91851e-06
76.0784	0	0	0.0759678	0	0	0	0	0.0278661			76.0784	0	0	0.0733691	0	0	0	0	0.0307551			76.0784	0	0	0.163369	0	0	0	0	1.29392e-05
76.4706	0	0	0.0734903	0	0	0	0	0.031169			76.4706	0	0	0.0704373	0	0	0	0	0.0367179			76.4706	0	0	0.16665	0	0	0	0	3.81073e-05
76.8627	0	0	0.0700632	0	0	0	0	0.0342256			76.8627	0	0	0.0660627	0	0	0	0	0.0429572			76.8627	0	0	0.16592	0	0	0	0	0.000101392
77.2549	0	0	0.0656565	0	0	0	0	0.0375224			77.2549	0	0	0.0605657	0	0	0	0	0.049373			77.2549	0	0	0.160919	0	0	0	0	0.00024703
77.6471	0	0	0.0603403	0	0	0	0	0.0417272			77.6471	0	0	0.0544255	0	0	0	0	0.0560056			77.6471	0	0	0.15165	0	0	0	0	0.000556161
78.0392	0	0	0.0542766	0	0	0	0	0.0474396			78.0392	0	0	0.0480796	0	0	0	0	0.0629577			78.0392	0	0	0.138417	0	0	0	0	0.0011677
78.4314	0	0	0.0476845	0	0	0	0	0.0549533			78.4314	0	0	0.0417919	0	0	0	0	0.0702161			78.4314	0	0	0.121867	0	0	0	0	0.00229954
78.8235	0	0	0.0408197	0	0	0	0	0.0641426			78.8235	0	0	0.0356473	0	0	0	0	0.077505			78.8235	0	0	0.10301	0	0	0	0	0.00425971
79.2157	0	0	0.0339614	0	0	0	0	0.074504			79.2157	0	0	0.0296441	0	0	0	0	0.0843023			79.2157	0	0	0.0831557	0	0	0	0	0.00744181
79.6078	0	0	0.0273844	0	0	0	0	0.0852858			79.6078	0	0	0.023813	0	0	0	0	0.0900278			79.6078	0	0	0.0637544	0	0	0	0	0.0122924
80	0	0	0.0213228	0	0	0	0	0.0956336			80	0	0	0.0182855	0	0	0	0	0.094282			80	0	0	0.0461499	0	0	0	0	0.0192542
80.3922	0	0	0.0159432	0	0	0	0	0.104733			80.3922	0	0	0.0132834	0	0	0	0	0.0970119			80.3922	0	0	0.031343	0	0	0	0	0.0287068
80.7843	0	0	0.0113554	0	0	0	0	0.111967			80.7843	0	0	0.00904319	0	0	0	0	0.0985481			80.7843	0	0	0.0198394	0	0	0	0	0.0408899
81.1765	0	0	0.00762701	0	0	0	0	0.117061			81.1765	0	0	0.00572278	0	0	0	0	0.0995167			81.1765	0	0	0.011623	0	0	0	0	0.0558271
81.5686	0	0	0.00477932	0	0	0	0	0.120151			81.5686	0	0	0.00334305	0	0	0	0	0.100648			81.5686	0	0	0.00625825	0	0	0	0	0.0732531
81.9608	0	0	0.00276499	0	0	0	0	0.121659			81.9608	0	0	0.00179159	0	0	0	0	0.102514			81.9608	0	0	0.00307548	0	0	0	0	0.0925678
82.3529	0	0	0.00146294	0	0	0	0	0.12201			82.3529	0	0	0.000875906	0	0	0	0	0.105282			82.3529	0	0	0.00136892	0	0	0	0	0.112853
82.7451	0	0	0.000702549	0	0	0	0	0.121345			82.7451	0	0	0.000388189	0	0	0	0	0.108608			82.7451	0	0	0.000547573	0	0	0	0	0.132956
83.1373	0	0	0.000304437	0	0	0	0	0.119451			83.1373	0	0	0.000154795	0	0	0	0	0.111712			83.1373	0	0	0.000194755	0	0	0	0	0.151606
83.5294	0	0	0.000117952	0	0	0	0	0.115978			83.5294	0	0	5.48884e-05	0	0	0	0	0.113608			83.5294	0	0	6.02372e-05	0	0	0	0	0.167509
83.9216	0	0	4.03049e-05	0	0	0	0	0.110798			83.9216	0	0	1.68608e-05	0	0	0	0	0.113375			83.9216	0	0	1.53838e-05	0	0	0	0	0.179459
84.3137	0	0	1.18254e-05	0	0	0	0	0.104205			84.3137	0	0	4.40425e-06	0	0	0	0	0.110404			84.3137	0	0	3.02841e-06	0	0	0	0	0.186477
84.7059	0	0	2.81494e-06	0	0	0	0	0.09678			84.7059	0	0	9.03313e-07	0	0	0	0	0.104538			84.7059	0	0	3.63387e-07	0	0	0	0	0.187986
85.098	0	0	4.78163e-07	0	0	0	0	0.0890282			85.098	0	0	1.03813e-07	0	0	0	0	0.0960973			85.098	0	0	0	0	0	0	0	0.183911
85.4902	0	0	5.81869e-08	0	0	0	0	0.0810614			85.4902	0	0	8.9697e-09	0	0	0	0	0.0857362			85.4902	0	0	0	0	0	0	0	0.174625
85.8824	0	0	4.28652e-09	0	0	0	0	0.0725947			85.8824	0	0	2.64013e-10	0	0	0	0	0.0742287			85.8824	0	0	0	0	0	0	0	0.160734
86.2745	0	0	1.61218e-10	0	0	0	0	0.0632618			86.2745	0	0	0	0	0	0	0	0.0622794			86.2745	0	0	0	0	0	0	0	0.142914
86.6667	0	0	0	0	0	0	0	0.0530049			86.6667	0	0	0	0	0	0	0	0.0504517			86.6667	0	0	0	0	0	0	0	0.121956
87.0588	0	0	0	0	0	0	0	0.0422589			87.0588	0	0	0	0	0	0	0	0.0392101			87.0588	0	0	0	0	0	0	0	0.0990078
87.451	0	0	0	0	0	0	0	0.0318201			87.451	0	0	0	0	0	0	0	0.028991			87.451	0	0	0	0	0	0	0	0.0757111
87.8431	0	0	0	0	0	0	0	0.0225195			87.8431	0	0	0	0	0	0	0	0.0202049			87.8431	0	0	0	0	0	0	0	0.0540059
88.2353	0	0	0	0	0	0	0	0.0149293			88.2353	0	0	0	0	0	0	0	0.0131542			88.2353	0	0	0	0	0	0	0	0.0356235
88.6275	0	0	0	0	0	0	0	0.00924201			88.6275	0	0	0	0	0	0	0	0.00793526			88.6275	0	0	0	0	0	0	0	0.0215675
89.0196	0	0	0	0	0	0	0	0.00531966			89.0196	0	0	0	0	0	0	0	0.00440375			89.0196	0	0	0	0	0	0	0	0.0119069
89.4118	0	0	0	0	0	0	0	0.00283155			89.4118	0	0	0	0	0	0	0	0.0022346			89.4118	0	0	0	0	0	0	0	0.00595872
89.8039	0	0	0	0	0	0	0	0.00138358			89.8039	0	0	0	0	0	0	0	0.0010307			89.8039	0	0	0	0	0	0	0	0.00268702
90.1961	0	0	0	0	0	0	0	0.000615643			90.1961	0	0	0	0	0	0	0	0.0004292			90.1961	0	0	0	0	0	0	0	0.00108413
90.5882	0	0	0	0	0	0	0	0.000247238			90.5882	0	0	0	0	0	0	0	0.000159841			90.5882	0	0	0	0	0	0	0	0.0003853
90.9804	0	0	0	0	0	0	0	8.88612e-05			90.9804	0	0	0	0	0	0	0	5.24802e-05			90.9804	0	0	0	0	0	0	0	0.000118507
91.3725	0	0	0	0	0	0	0	2.8135e-05			91.3725	0	0	0	0	0	0	0	1.47167e-05			91.3725	0	0	0	0	0	0	0	3.02428e-05
91.7647	0	0	0	0	0	0	0	7.50762e-06			91.7647	0	0	0	0	0	0	0	3.36924e-06			91.7647	0	0	0	0	0	0	0	5.64669e-06
92.1569	0	0	0	0	0	0	0	1.54049e-06			92.1569	0	0	0	0	0	0	0	5.64981e-07			92.1569	0	0	0	0	0	0	0	5.31725e-07
92.549	0	0	0	0	0	0	0	2.13617e-07			92.549	0	0	0	0	0	0	0	6.08187e-08			92.549	0	0	0	0	0	0	0	0
92.9412	0	0	0	0	0	0	0	1.90751e-08			92.9412	0	0	0	0	0	0	0	4.03186e-09			92.9412	0	0	0	0	0	0	0	0
93.3333	0	0	0	0	0	0	0	7.75642e-10			93.3333	0	0	0	0	0	0	0	0			93.3333	0	0	0	0	0	0	0	0
93.7255	0	0	0	0	0	0	0	1.16667e-11			93.7255	0	0	0	0	0	0	0	0			93.7255	0	0	0	0	0	0	0	0
94.1176	0	0	0	0	0	0	0	0			94.1176	0	0	0	0	0	0	0	0			94.1176	0	0	0	0	0	0	0	0
94.5098	0	0	0	0	0	0	0	0			94.5098	0	0	0	0	0	0	0	0			94.5098	0	0	0	0	0	0	0	0
94.902	0	0	0	0	0	0	0	0			94.902	0	0	0	0	0	0	0	0			94.902	0	0	0	0	0	0	0	0
95.2941	0	0	0	0	0	0	0	0			95.2941	0	0	0	0	0	0	0	0			95.2941	0	0	0	0	0	0	0	0
95.6863	0	0	0	0	0	0	0	0			95.6863	0	0	0	0	0	0	0	0			95.6863	0	0	0	0	0	0	0	0
96.0784	0	0	0	0	0	0	0	0			96.0784	0	0	0	0	0	0	0	0			96.0784	0	0	0	0	0	0	0	0
96.4706	0	0	0	0	0	0	0	0			96.4706	0	0	0	0	0	0	0	0			96.4706	0	0	0	0	0	0	0	0
96.8627	0	0	0	0	0	0	0	0			96.8627	0	0	0	0	0	0	0	0			96.8627	0	0	0	0	0	0	0	0
97.2549	0	0	0	0	0	0	0	0			97.2549	0	0	0	0	0	0	0	0			97.2549	0	0	0	0	0	0	0	0
97.6471	0	0	0	0	0	0	0	0			97.6471	0	0	0	0	0	0	0	0			97.6471	0	0	0	0	0	0	0	0
98.0392	0	0	0	0	0	0	0	0			98.0392	0	0	0	0	0	0	0	0			98.0392	0	0	0	0	0	0	0	0
98.4314	0	0	0	0	0	0	0	0			98.4314	0	0	0	0	0	0	0	0			98.4314	0	0	0	0	0	0	0	0
98.8235	0	0	0	0	0	0	0	0			98.8235	0	0	0	0	0	0	0	0			98.8235	0	0	0	0	0	0	0	0
99.2157	0	0	0	0	0	0	0	0			99.2157	0	0	0	0	0	0	0	0			99.2157	0	0	0	0	0	0	0	0
99.6078	0	0	0	0	0	0	0	0			99.6078	0	0	0	0	0	0	0	0			99.6078	0	0	0	0	0	0	0	0
100	0	0	0	0	0	0	0	0			100	0	0	0	0	0	0	0	0			100	0	0	0	0	0	0	0	0
