# Supplementary material for: Ligand-coupled conformational changes in a cyclic nucleotide-gated ion channel revealed by time-resolved transition metal ion FRET
Source: eLife. 2024 Dec 10;13:RP99854. doi: 10.7554/eLife.99854 (PMC11630820; doi:10.7554/eLife.99854)
Supplement: Figure 5—source data 1. [file elife-99854-fig5-data1.xlsx]

## Sheet: Figure5_A_B
FePhenM A)																		RuBpy B)
Frequencies,MHz	Modulation1 (Donor)	Phase1 (Donor)	Modulation2 (Apo-FePhenM)	Phase2 (Apo-FePhenM)	Modulation3 (cAMP- FePhenM)	Phase3 (cAMP- FePhenM)	Modulation4 (cGMP- FePhenM)	Phase4 (cGMP- FePhenM)	GlobalFit- Modulation1 (Donor)	GlobalFit- Phase1 (Donor)	GlobalFit- Modulation2 (Apo-FePhenM)	GlobalFit- Phase2 (Apo-FePhenM)	GlobalFit- Modulation3 (cAMP- FePhenM)	GlobalFit- Phase3 (cAMP- FePhenM)	GlobalFit- Modulation4 (cGMP- FePhenM)	GlobalFit- Phase4 (cGMP- FePhenM)		Frequencies, MHz	Modulation1 (Donor)	Phase1 (Donor)	Modulation2 (Apo-RuBpy)	Phase2 (Apo-RuBpy)	Modulation3 (cAMP- RuBpy)	Phase3 (cAMP- RuBpy)	Modulation4 (cGMP- RuBpy)	Phase4 (cGMP- RuBpy)	GlobalFit- Modulation1 (Donor)	GlobalFit-Phase1 (Donor)	GlobalFit- Modulation2 (Apo-RuBpy)	GlobalFit-Phase2 (Apo-RuBpy)	GlobalFit- Modulation3 (cAMP- RuBpy)	GlobalFit- Phase3 (cAMP- RuBpy)	GlobalFit-Modulation4 (cGMP- RuBpy)	GlobalFit- Phase4 (cGMP- RuBpy)
10	0.678999	47.2209	0.806818	32.0857	0.752735	27.0445	0.80428	30.5207	0.677887	47.3213	0.802037	32.1737	0.756474	27.0145	0.807271	30.4966		10	0.678996	47.2215	0.817589	30.379	0.736716	28.981	0.807017	29.81	0.677998	47.3126	0.813462	30.4997	0.739411	28.8472	0.80693	29.8551
20	0.418589	64.9758	0.59574	48.2946	0.580207	32.6718	0.603189	45.026	0.643964	49.912	0.778101	34.213	0.732405	28.0751	0.784059	32.3975		20	0.418584	64.9765	0.618566	46.1341	0.547892	34.3852	0.61054	43.9503	0.644078	49.9034	0.791001	32.4484	0.713326	29.9695	0.784207	31.6842
30	0.294324	72.3647	0.461648	57.1975	0.507942	35.2938	0.477735	53.0071	0.612197	52.2515	0.754919	36.112	0.710218	28.9719	0.761594	34.1623		30	0.29432	72.3655	0.486724	55.3443	0.470361	35.7148	0.486356	51.8989	0.612313	52.243	0.769215	34.2705	0.689226	30.906	0.76228	33.3823
40	0.225793	76.5027	0.374608	62.8128	0.46441	38.4707	0.395349	58.1463	0.582579	54.3679	0.732571	37.8836	0.689856	29.7325	0.739952	35.8039		40	0.225789	76.5034	0.397864	61.3406	0.427824	37.4876	0.403341	57.0676	0.582696	54.3596	0.748166	35.9783	0.667067	31.6856	0.741202	34.9629
50	0.182686	79.2127	0.314742	66.7	0.429063	41.8849	0.337441	61.896	0.555039	56.2866	0.711096	39.5398	0.671217	30.3812	0.719169	37.334		50	0.182682	79.2133	0.334685	65.5669	0.397126	39.6667	0.344403	60.7158	0.555156	56.2785	0.727887	37.5822	0.646753	32.3339	0.720992	36.4379
60	0.1529	81.4097	0.270835	69.6484	0.39839	45.1083	0.293829	64.7477	0.52947	58.0304	0.690507	41.0909	0.654175	30.9389	0.699255	38.7631		60	0.152897	81.4102	0.288025	68.647	0.371845	41.99	0.300542	63.4485	0.529586	58.0225	0.708384	39.092	0.62816	32.873	0.701644	37.8175
70	0.130148	82.8875	0.237035	71.9088	0.371529	48.2002	0.260589	66.8311	0.505745	59.6192	0.670797	42.5464	0.638593	31.4231	0.680203	40.1004		70	0.130145	82.8879	0.252449	70.9065	0.349882	44.2934	0.266663	65.5163	0.505859	59.6116	0.689651	40.5157	0.611151	33.3223	0.683141	39.111
80	0.11286	83.7453	0.210833	73.5927	0.347449	50.9843	0.234509	68.577	0.483729	61.0707	0.65195	43.9149	0.624335	31.8489	0.661993	41.3543		80	0.112857	83.7456	0.224921	72.6456	0.330713	46.494	0.240573	67.1241	0.483842	61.0634	0.671673	41.861	0.595589	33.698	0.665455	40.3264
90	0.100076	84.003	0.189747	74.9426	0.325249	53.5387	0.213594	70.0695	0.46329	62.4004	0.633937	45.2038	0.611269	32.2283	0.644598	42.5323		90	0.100074	84.0031	0.203353	74.1376	0.313856	48.6287	0.219462	68.6198	0.4634	62.3933	0.654426	43.1342	0.581338	34.0142	0.648554	41.4707
100	0.0904625	84.632	0.173031	76.0739	0.30611	55.9447	0.196313	71.5515	0.444296	63.6217	0.616727	46.4199	0.599272	32.5716	0.627986	43.641		100	0.0904602	84.6319	0.185438	75.5136	0.298706	50.8075	0.20202	69.9317	0.444405	63.6147	0.637885	44.3412	0.568271	34.2823	0.632402	42.55
110	0.0821675	85.1199	0.158978	77.1749	0.287986	58.2219	0.181069	72.913	0.426627	64.7463	0.600285	47.5691	0.588232	32.8871	0.612124	44.6862		110	0.0821653	85.1197	0.170218	76.7608	0.284007	52.9298	0.187263	71.1846	0.426734	64.7396	0.622022	45.4871	0.55627	34.5122	0.616964	43.5698
120	0.0752834	85.7394	0.146759	78.1473	0.270746	60.2384	0.167465	73.93	0.41017	65.7845	0.584577	48.6569	0.578046	33.1816	0.596974	45.6733		120	0.0752813	85.739	0.157133	77.7659	0.270061	54.9718	0.174315	72.3948	0.410274	65.778	0.606807	46.5766	0.545226	34.7121	0.602203	44.5351
130	0.0692714	86.3606	0.136262	79.1092	0.255969	61.8222	0.155933	74.9521	0.394819	66.7453	0.569565	49.688	0.568621	33.4605	0.582502	46.607		130	0.0692694	86.3601	0.146095	78.6472	0.256057	56.7251	0.162645	73.3815	0.394921	66.739	0.592211	47.6137	0.535042	34.8886	0.588084	45.4501
140	0.0637417	86.4575	0.126744	79.8175	0.243052	63.3707	0.145406	75.3202	0.38048	67.6366	0.555214	50.6668	0.559875	33.7284	0.568672	47.4916		140	0.0637397	86.4568	0.136368	79.3	0.244042	58.1239	0.152958	74.222	0.380579	67.6304	0.578206	48.6022	0.52563	35.0473	0.574574	46.3186
150	0.059436	85.9486	0.118781	80.4963	0.230856	64.973	0.137548	75.9128	0.367067	68.4652	0.541489	51.5971	0.551734	33.9887	0.55545	48.331		150	0.059434	85.9476	0.127934	80.1127	0.233158	59.3816	0.144184	75.0466	0.367164	68.4592	0.564763	49.5455	0.51691	35.1929	0.561639	47.1443
160	0.0564837	86.2629	0.111288	80.8102	0.219454	66.1346	0.130714	76.7293	0.3545	69.2372	0.528357	52.4827	0.544133	34.2443	0.542803	49.1285		160	0.0564818	86.2618	0.120159	80.5192	0.223819	60.7724	0.136539	75.7195	0.354595	69.2314	0.551855	50.4466	0.508812	35.3292	0.549248	47.9302
170	0.0532489	86.5898	0.105481	81.036	0.209684	67.3977	0.123683	77.5423	0.34271	69.958	0.515786	53.3265	0.537014	34.4974	0.5307	49.8873		170	0.0532469	86.5884	0.114189	80.6432	0.21455	61.8244	0.129279	76.0168	0.342802	69.9523	0.539455	51.3083	0.501272	35.4591	0.537373	48.6792
180	0.0500382	86.8665	0.10052	81.542	0.199935	68.6728	0.116978	78.2137	0.33163	70.6322	0.503746	54.1316	0.530325	34.7497	0.51911	50.6103		180	0.0500363	86.8651	0.109381	81.1688	0.207712	62.8694	0.124391	76.3738	0.33172	70.6268	0.52754	52.1332	0.494233	35.5852	0.525985	49.3939
190	0.0476416	86.5298	0.0949862	82.4708	0.191009	69.7466	0.109787	78.7626	0.321205	71.2642	0.492208	54.9006	0.524021	35.0026	0.508005	51.3001		190	0.0476397	86.5282	0.104297	82.0148	0.199921	64.3691	0.119517	77.1377	0.321292	71.2589	0.516083	52.9235	0.487647	35.7096	0.515057	50.0766
200	0.0456549	86.7006	0.0902543	82.8475	0.18173	70.8454	0.104696	79.1451	0.31138	71.8576	0.481143	55.6359	0.518061	35.2571	0.497359	51.959		200	0.0456529	86.699	0.0993742	82.8576	0.19148	65.3885	0.114332	77.8892	0.311466	71.8524	0.505064	53.6815	0.481467	35.8338	0.504566	50.7295
									0.302109	72.4157	0.470528	56.3396	0.51241	35.514	0.487145	52.5892											0.302192	72.4107	0.49446	54.409	0.475654	35.9591	0.494487	51.3545
									0.293348	72.9415	0.460337	57.0139	0.507037	35.7737	0.477341	53.1926											0.29343	72.9366	0.484251	55.1079	0.470173	36.0865	0.4848	51.9534
									0.28506	73.4376	0.450548	57.6604	0.501913	36.0367	0.467924	53.771											0.285139	73.4328	0.474417	55.7798	0.464992	36.2169	0.475482	52.5279
									0.277207	73.9064	0.441139	58.281	0.497014	36.3032	0.458873	54.3261											0.277285	73.9017	0.46494	56.4263	0.460082	36.3507	0.466516	53.0795
									0.26976	74.35	0.43209	58.8773	0.492317	36.5732	0.450168	54.8593											0.269836	74.3455	0.455803	57.0487	0.455419	36.4885	0.457882	53.6096
									0.262687	74.7704	0.423383	59.4505	0.487803	36.8468	0.441791	55.3721											0.262761	74.766	0.44699	57.6484	0.450979	36.6305	0.449565	54.1195
									0.255963	75.1694	0.415	60.0021	0.483455	37.124	0.433724	55.8657											0.256036	75.165	0.438485	58.2267	0.446743	36.7769	0.441546	54.6104
									0.249563	75.5483	0.406924	60.5332	0.479257	37.4046	0.425952	56.3413											0.249635	75.5441	0.430273	58.7846	0.442692	36.9278	0.433813	55.0834
									0.243466	75.9088	0.399139	61.0451	0.475196	37.6885	0.418458	56.7999											0.243536	75.9047	0.42234	59.3232	0.43881	37.0833	0.42635	55.5396
									0.237651	76.2521	0.391632	61.5387	0.471258	37.9756	0.41123	57.2427											0.237719	76.248	0.414675	59.8435	0.435082	37.2433	0.419145	55.9798
									0.232099	76.5793	0.384387	62.015	0.467434	38.2656	0.404253	57.6705											0.232166	76.5754	0.407263	60.3464	0.431496	37.4079	0.412184	56.405
									0.226794	76.8916	0.377393	62.475	0.463714	38.5583	0.397514	58.0841											0.22686	76.8877	0.400095	60.8327	0.428039	37.5768	0.405456	56.816
									0.22172	77.1899	0.370637	62.9195	0.460088	38.8536	0.391002	58.4843											0.221784	77.1862	0.393158	61.3034	0.424701	37.7499	0.39895	57.2135
									0.216862	77.4752	0.364108	63.3492	0.456549	39.1511	0.384707	58.872											0.216925	77.4715	0.386442	61.7591	0.421472	37.9272	0.392656	57.5984
									0.212208	77.7482	0.357795	63.765	0.45309	39.4507	0.378616	59.2477											0.21227	77.7446	0.379938	62.2005	0.418343	38.1084	0.386563	57.9711
									0.207745	78.0098	0.351689	64.1674	0.449705	39.7521	0.372722	59.6121											0.207806	78.0062	0.373637	62.6283	0.415307	38.2934	0.380662	58.3325
									0.203462	78.2605	0.345778	64.5572	0.446388	40.055	0.367013	59.9658											0.203521	78.257	0.367529	63.0431	0.412357	38.482	0.374945	58.683
									0.199348	78.5012	0.340055	64.9349	0.443134	40.3594	0.361483	60.3094											0.199407	78.4977	0.361606	63.4454	0.409486	38.6739	0.369403	59.0232
									0.195394	78.7322	0.334511	65.3011	0.43994	40.6649	0.356121	60.6433											0.195452	78.7289	0.35586	63.836	0.406688	38.8691	0.364028	59.3536
									0.191591	78.9543	0.329138	65.6563	0.436799	40.9713	0.350922	60.9681											0.191648	78.9511	0.350285	64.2152	0.403958	39.0673	0.358814	59.6747
									0.187931	79.1679	0.323929	66.001	0.43371	41.2784	0.345877	61.2841											0.187986	79.1647	0.344872	64.5835	0.401291	39.2683	0.353753	59.987
									0.184405	79.3735	0.318876	66.3357	0.430669	41.586	0.34098	61.5919											0.184459	79.3704	0.339615	64.9415	0.398683	39.472	0.348838	60.2908
									0.181007	79.5716	0.313973	66.6609	0.427673	41.894	0.336224	61.8917											0.18106	79.5685	0.334508	65.2895	0.39613	39.678	0.344064	60.5866
									0.17773	79.7624	0.309213	66.9769	0.424719	42.2021	0.331604	62.184											0.177782	79.7594	0.329545	65.628	0.393628	39.8864	0.339424	60.8747
									0.174568	79.9465	0.304591	67.2841	0.421805	42.5102	0.327112	62.4691											0.174619	79.9435	0.32472	65.9573	0.391174	40.0968	0.334912	61.1555
									0.171514	80.1241	0.3001	67.5828	0.418929	42.8181	0.322745	62.7473											0.171565	80.1212	0.320028	66.2778	0.388765	40.3092	0.330525	61.4293
									0.168564	80.2957	0.295736	67.8736	0.416088	43.1256	0.318496	63.0189											0.168614	80.2927	0.315463	66.5899	0.386398	40.5232	0.326256	61.6964
									0.165713	80.4614	0.291493	68.1566	0.413283	43.4327	0.314362	63.2843											0.165762	80.4585	0.31102	66.8939	0.384071	40.7389	0.322101	61.9572
									0.162954	80.6216	0.287366	68.4322	0.410509	43.7391	0.310336	63.5436											0.163003	80.6188	0.306695	67.19	0.381782	40.956	0.318055	62.2118
									0.160286	80.7765	0.283351	68.7006	0.407767	44.0447	0.306416	63.7971											0.160333	80.7738	0.302484	67.4787	0.379527	41.1744	0.314113	62.4606
									0.157701	80.9265	0.279443	68.9622	0.405056	44.3495	0.302596	64.0451											0.157748	80.9238	0.298382	67.7602	0.377307	41.3939	0.310273	62.7038
									0.155198	81.0717	0.275639	69.2172	0.402373	44.6533	0.298873	64.2878											0.155245	81.069	0.294385	68.0347	0.375117	41.6144	0.30653	62.9416
									0.152773	81.2124	0.271934	69.4659	0.399718	44.9559	0.295243	64.5254											0.152818	81.2097	0.290489	68.3025	0.372958	41.8357	0.30288	63.1743
									0.150421	81.3487	0.268324	69.7085	0.39709	45.2573	0.291703	64.758											0.150465	81.3461	0.286691	68.5638	0.370828	42.0579	0.29932	63.402
									0.148139	81.4809	0.264807	69.9452	0.394488	45.5574	0.288248	64.9859											0.148183	81.4783	0.282987	68.819	0.368725	42.2806	0.295846	63.625
									0.145925	81.6091	0.261378	70.1763	0.391911	45.8561	0.284877	65.2093											0.145969	81.6066	0.279373	69.0681	0.366647	42.5038	0.292456	63.8434
									0.143776	81.7336	0.258034	70.4019	0.38936	46.1533	0.281586	65.4283											0.143819	81.7311	0.275848	69.3114	0.364595	42.7274	0.289146	64.0574
									0.141688	81.8545	0.254773	70.6223	0.386832	46.4489	0.278372	65.643											0.14173	81.852	0.272406	69.5492	0.362567	42.9513	0.285913	64.2672
									0.139659	81.9719	0.251591	70.8376	0.384328	46.7429	0.275231	65.8537											0.139701	81.9695	0.269047	69.7815	0.360561	43.1755	0.282755	64.4729
									0.137687	82.0859	0.248486	71.048	0.381847	47.0352	0.272163	66.0604											0.137729	82.0836	0.265766	70.0087	0.358577	43.3997	0.279669	64.6747
									0.13577	82.1969	0.245454	71.2536	0.379388	47.3257	0.269164	66.2634											0.135811	82.1945	0.262561	70.2307	0.356614	43.6239	0.276652	64.8727
									0.133905	82.3047	0.242494	71.4547	0.376952	47.6144	0.266231	66.4626											0.133945	82.3024	0.25943	70.448	0.354672	43.848	0.273703	65.0671
									0.13209	82.4096	0.239603	71.6514	0.374537	47.9012	0.263363	66.6583											0.132129	82.4074	0.256371	70.6605	0.352749	44.072	0.270818	65.258
									0.130322	82.5118	0.236778	71.8438	0.372144	48.1861	0.260557	66.8506											0.130362	82.5095	0.25338	70.8684	0.350846	44.2958	0.267996	65.4455
									0.128602	82.6112	0.234018	72.0321	0.369772	48.4691	0.257812	67.0395											0.12864	82.609	0.250455	71.0719	0.348961	44.5193	0.265234	65.6297
									0.126925	82.708	0.23132	72.2164	0.367421	48.75	0.255124	67.2252											0.126963	82.7058	0.247595	71.2711	0.347093	44.7424	0.262531	65.8108
									0.125292	82.8024	0.228682	72.3968	0.36509	49.0289	0.252493	67.4078											0.125329	82.8002	0.244798	71.4662	0.345243	44.965	0.259885	65.9888
									0.1237	82.8943	0.226102	72.5735	0.362779	49.3057	0.249916	67.5874											0.123737	82.8922	0.242061	71.6573	0.34341	45.1872	0.257294	66.1638
									0.122147	82.984	0.223578	72.7466	0.360488	49.5805	0.247392	67.7639											0.122184	82.9819	0.239383	71.8445	0.341593	45.4089	0.254756	66.336
									0.120632	83.0714	0.221109	72.9161	0.358218	49.8531	0.24492	67.9377											0.120669	83.0693	0.236761	72.0279	0.339793	45.6299	0.252269	66.5053
									0.119155	83.1567	0.218693	73.0823	0.355966	50.1236	0.242497	68.1086											0.119191	83.1546	0.234195	72.2076	0.338008	45.8503	0.249831	66.672
									0.117713	83.2399	0.216328	73.2451	0.353734	50.3919	0.240121	68.2769											0.117748	83.2378	0.231681	72.3838	0.336238	46.0699	0.247443	66.8361
									0.116305	83.3211	0.214012	73.4047	0.351522	50.658	0.237793	68.4425											0.11634	83.3191	0.22922	72.5565	0.334483	46.2889	0.245101	66.9977
									0.11493	83.4004	0.211745	73.5613	0.349328	50.922	0.235509	68.6056											0.114965	83.3984	0.226808	72.7259	0.332743	46.507	0.242804	67.1568
									0.113587	83.4779	0.209524	73.7148	0.347153	51.1837	0.233269	68.7662											0.113621	83.4759	0.224446	72.892	0.331017	46.7244	0.240551	67.3135
									0.112275	83.5535	0.207348	73.8654	0.344997	51.4432	0.231072	68.9244											0.112309	83.5516	0.222131	73.055	0.329306	46.9408	0.238341	67.4679
									0.110993	83.6274	0.205217	74.0131	0.342859	51.7005	0.228916	69.0802											0.111026	83.6255	0.219861	73.2149	0.327608	47.1564	0.236173	67.62
									0.109739	83.6997	0.203127	74.1581	0.34074	51.9556	0.2268	69.2337											0.109772	83.6978	0.217636	73.3718	0.325923	47.3711	0.234044	67.77
									0.108514	83.7704	0.201079	74.3004	0.338639	52.2084	0.224723	69.385											0.108546	83.7685	0.215455	73.5259	0.324253	47.5847	0.231955	67.9178
									0.107315	83.8394	0.199072	74.4401	0.336556	52.459	0.222684	69.5341											0.107347	83.8376	0.213316	73.6771	0.322595	47.7975	0.229904	68.0636
									0.106142	83.907	0.197103	74.5773	0.334491	52.7074	0.220681	69.6811											0.106174	83.9052	0.211217	73.8255	0.32095	48.0091	0.22789	68.2073
									0.104995	83.9731	0.195172	74.712	0.332444	52.9536	0.218715	69.826											0.105026	83.9713	0.209158	73.9713	0.319318	48.2198	0.225911	68.3491
									0.103872	84.0378	0.193278	74.8443	0.330414	53.1975	0.216783	69.9688											0.103903	84.036	0.207138	74.1145	0.317698	48.4294	0.223968	68.4889
									0.102772	84.1012	0.191419	74.9742	0.328402	53.4392	0.214885	70.1097											0.102803	84.0994	0.205156	74.2552	0.316091	48.6379	0.222058	68.6269
									0.101696	84.1632	0.189596	75.1019	0.326408	53.6787	0.213019	70.2487											0.101726	84.1614	0.20321	74.3934	0.314496	48.8454	0.220181	68.7631
									0.100641	84.2239	0.187806	75.2274	0.32443	53.9159	0.211186	70.3857											0.100672	84.2221	0.2013	74.5292	0.312914	49.0517	0.218337	68.8975
									0.0996086	84.2834	0.186049	75.3507	0.32247	54.151	0.209384	70.5209											0.0996386	84.2816	0.199425	74.6626	0.311343	49.2569	0.216524	69.0302
									0.0985967	84.3416	0.184324	75.472	0.320527	54.3839	0.207613	70.6543											0.0986264	84.3399	0.197583	74.7938	0.309784	49.4609	0.214741	69.1611
									0.097605	84.3987	0.182631	75.5911	0.318601	54.6145	0.205871	70.786											0.0976344	84.397	0.195774	74.9228	0.308237	49.6638	0.212988	69.2904
									0.096633	84.4547	0.180967	75.7083	0.316692	54.843	0.204158	70.9159											0.0966622	84.453	0.193997	75.0496	0.306701	49.8655	0.211264	69.4182
									0.0956801	84.5095	0.179333	75.8236	0.3148	55.0694	0.202473	71.0441											0.0957089	84.5079	0.192251	75.1743	0.305177	50.0661	0.209567	69.5443
									0.0947457	84.5633	0.177728	75.9369	0.312924	55.2936	0.200816	71.1706											0.0947743	84.5617	0.190536	75.2969	0.303664	50.2654	0.207899	69.6689
									0.0938293	84.6161	0.176151	76.0484	0.311064	55.5156	0.199185	71.2956											0.0938576	84.6144	0.18885	75.4176	0.302162	50.4636	0.206257	69.7919
									0.0929303	84.6678	0.174602	76.1581	0.309221	55.7356	0.19758	71.4189											0.0929584	84.6662	0.187194	75.5362	0.300671	50.6605	0.204641	69.9135
									0.0920484	84.7185	0.173078	76.2661	0.307394	55.9534	0.196001	71.5407											0.0920762	84.7169	0.185565	75.653	0.299191	50.8562	0.203051	70.0337
									0.091183	84.7683	0.171581	76.3723	0.305583	56.1691	0.194447	71.6609											0.0912105	84.7667	0.183964	75.7679	0.297723	51.0507	0.201485	70.1525
									0.0903336	84.8172	0.170109	76.4769	0.303788	56.3828	0.192916	71.7797											0.0903609	84.8156	0.182389	75.881	0.296265	51.244	0.199944	70.2698
									0.0894998	84.8652	0.168662	76.5798	0.302009	56.5943	0.19141	71.897											0.0895269	84.8636	0.180841	75.9923	0.294817	51.4361	0.198426	70.3858
									0.0886813	84.9123	0.167239	76.6811	0.300245	56.8039	0.189927	72.0128											0.0887081	84.9107	0.179318	76.1019	0.29338	51.6269	0.196932	70.5005
									0.0878775	84.9585	0.165839	76.7809	0.298498	57.0113	0.188466	72.1273											0.0879041	84.957	0.17782	76.2098	0.291954	51.8165	0.19546	70.6139
									0.0870881	85.0039	0.164462	76.8792	0.296765	57.2168	0.187027	72.2404											0.0871144	85.0024	0.176346	76.316	0.290538	52.0048	0.194009	70.726
									0.0863127	85.0485	0.163108	76.9759	0.295048	57.4203	0.18561	72.3521											0.0863388	85.047	0.174896	76.4206	0.289132	52.1919	0.192581	70.8368
									0.0855509	85.0923	0.161775	77.0712	0.293346	57.6218	0.184214	72.4624											0.0855768	85.0908	0.173469	76.5236	0.287737	52.3778	0.191173	70.9464
									0.0848025	85.1353	0.160464	77.1651	0.291659	57.8213	0.182838	72.5715											0.0848281	85.1339	0.172065	76.6251	0.286352	52.5624	0.189786	71.0549
									0.0840669	85.1776	0.159173	77.2577	0.289988	58.0189	0.181483	72.6793											0.0840923	85.1762	0.170683	76.7251	0.284977	52.7458	0.188419	71.1621
									0.083344	85.2192	0.157903	77.3488	0.288331	58.2145	0.180147	72.7858											0.0833692	85.2177	0.169322	76.8236	0.283611	52.9279	0.187072	71.2682
									0.0826333	85.2601	0.156652	77.4386	0.286688	58.4082	0.17883	72.8911											0.0826583	85.2586	0.167983	76.9206	0.282256	53.1089	0.185744	71.3731
									0.0819346	85.3002	0.155421	77.5272	0.28506	58.6001	0.177533	72.9952											0.0819594	85.2988	0.166664	77.0163	0.280911	53.2885	0.184434	71.4769
									0.0812476	85.3397	0.154209	77.6144	0.283447	58.79	0.176254	73.098											0.0812722	85.3383	0.165365	77.1105	0.279575	53.467	0.183143	71.5796
									0.080572	85.3786	0.153015	77.7005	0.281848	58.9781	0.174992	73.1997											0.0805964	85.3772	0.164086	77.2034	0.278249	53.6442	0.18187	71.6813
									0.0799075	85.4167	0.15184	77.7853	0.280263	59.1644	0.173749	73.3003											0.0799317	85.4154	0.162826	77.295	0.276932	53.8202	0.180615	71.7818
									0.0792539	85.4543	0.150682	77.8689	0.278693	59.3488	0.172522	73.3997											0.0792779	85.4529	0.161585	77.3853	0.275625	53.9949	0.179377	71.8814
									0.0786108	85.4913	0.149541	77.9513	0.277136	59.5314	0.171313	73.498											0.0786346	85.4899	0.160362	77.4743	0.274328	54.1684	0.178155	71.9799
									0.077978	85.5277	0.148418	78.0327	0.275593	59.7123	0.17012	73.5952											0.0780016	85.5263	0.159158	77.562	0.27304	54.3408	0.17695	72.0774
									0.0773553	85.5634	0.14731	78.1129	0.274064	59.8914	0.168943	73.6913											0.0773787	85.5621	0.157971	77.6486	0.271761	54.5119	0.175761	72.1739
									0.0767424	85.5987	0.14622	78.192	0.272548	60.0687	0.167783	73.7864											0.0767657	85.5973	0.156801	77.7339	0.270491	54.6817	0.174588	72.2694
									0.0761392	85.6333	0.145144	78.27	0.271046	60.2443	0.166637	73.8804											0.0761622	85.632	0.155648	77.8181	0.269231	54.8504	0.173431	72.364
									0.0755453	85.6674	0.144085	78.347	0.269557	60.4182	0.165508	73.9734											0.0755682	85.6661	0.154512	77.9012	0.267979	55.0179	0.172288	72.4577
									0.0749606	85.701	0.14304	78.423	0.268081	60.5904	0.164393	74.0654											0.0749833	85.6997	0.153392	77.9831	0.266737	55.1842	0.171161	72.5504
									0.0743849	85.7341	0.142011	78.4979	0.266619	60.7609	0.163292	74.1564											0.0744074	85.7328	0.152287	78.064	0.265503	55.3493	0.170048	72.6422
									0.0738179	85.7667	0.140996	78.5719	0.265169	60.9298	0.162206	74.2465											0.0738402	85.7654	0.151198	78.1437	0.264279	55.5133	0.168949	72.7331
									0.0732594	85.7988	0.139995	78.6449	0.263732	61.097	0.161134	74.3355											0.0732816	85.7975	0.150125	78.2224	0.263063	55.676	0.167865	72.8231
									0.0727093	85.8304	0.139008	78.717	0.262308	61.2626	0.160076	74.4237											0.0727314	85.8291	0.149066	78.3001	0.261856	55.8376	0.166794	72.9122
									0.0721674	85.8615	0.138035	78.7881	0.260897	61.4266	0.159032	74.5108											0.0721893	85.8603	0.148022	78.3768	0.260658	55.998	0.165736	73.0005
									0.0716335	85.8922	0.137075	78.8583	0.259498	61.589	0.158	74.5971											0.0716553	85.8909	0.146992	78.4524	0.259468	56.1573	0.164692	73.0879
									0.0711075	85.9224	0.136128	78.9277	0.258111	61.7498	0.156982	74.6825											0.071129	85.9212	0.145976	78.5271	0.258287	56.3154	0.163661	73.1745
									0.070589	85.9522	0.135194	78.9961	0.256737	61.9091	0.155977	74.767											0.0706104	85.951	0.144973	78.6009	0.257114	56.4724	0.162642	73.2603
									0.0700781	85.9815	0.134273	79.0637	0.255374	62.0669	0.154984	74.8506											0.0700993	85.9803	0.143985	78.6736	0.25595	56.6282	0.161636	73.3453
									0.0695745	86.0105	0.133364	79.1305	0.254024	62.2231	0.154003	74.9334											0.0695956	86.0092	0.143009	78.7455	0.254794	56.7829	0.160642	73.4295
									0.069078	86.039	0.132467	79.1964	0.252685	62.3779	0.153034	75.0153											0.069099	86.0378	0.142046	78.8165	0.253646	56.9365	0.15966	73.5128
									0.0685886	86.0671	0.131582	79.2615	0.251358	62.5312	0.152078	75.0963											0.0686094	86.0659	0.141096	78.8866	0.252506	57.0889	0.15869	73.5955
									0.068106	86.0948	0.130708	79.3259	0.250043	62.683	0.151133	75.1766											0.0681267	86.0936	0.140158	78.9558	0.251375	57.2403	0.157732	73.6773
									0.0676302	86.1221	0.129846	79.3894	0.24874	62.8333	0.150199	75.256											0.0676507	86.1209	0.139233	79.0242	0.250252	57.3905	0.156785	73.7584
									0.067161	86.1491	0.128995	79.4522	0.247447	62.9822	0.149276	75.3347											0.0671813	86.1479	0.138319	79.0917	0.249137	57.5397	0.155849	73.8388
									0.0666982	86.1756	0.128155	79.5142	0.246167	63.1297	0.148365	75.4125											0.0667184	86.1745	0.137418	79.1584	0.248029	57.6878	0.154924	73.9184
									0.0662417	86.2018	0.127326	79.5755	0.244897	63.2759	0.147465	75.4896											0.0662618	86.2007	0.136527	79.2243	0.24693	57.8348	0.154009	73.9973
									0.0657914	86.2277	0.126507	79.636	0.243638	63.4206	0.146575	75.5659											0.0658114	86.2266	0.135648	79.2895	0.245838	57.9807	0.153106	74.0755
									0.0653472	86.2532	0.125699	79.6959	0.24239	63.5639	0.145695	75.6415											0.065367	86.2521	0.13478	79.3538	0.244754	58.1256	0.152212	74.153
									0.0649089	86.2784	0.124901	79.755	0.241153	63.706	0.144826	75.7163											0.0649286	86.2772	0.133923	79.4174	0.243678	58.2694	0.151329	74.2298
									0.0644765	86.3032	0.124113	79.8135	0.239927	63.8466	0.143967	75.7904											0.0644961	86.3021	0.133077	79.4802	0.24261	58.4121	0.150456	74.3059
									0.0640498	86.3277	0.123334	79.8712	0.238712	63.986	0.143117	75.8638											0.0640692	86.3266	0.132241	79.5423	0.241549	58.5538	0.149593	74.3813
									0.0636287	86.3519	0.122565	79.9284	0.237507	64.124	0.142278	75.9364											0.063648	86.3508	0.131415	79.6036	0.240496	58.6945	0.14874	74.4561
									0.063213	86.3757	0.121806	79.9848	0.236312	64.2608	0.141448	76.0084											0.0632322	86.3746	0.130599	79.6643	0.23945	58.8342	0.147896	74.5302
									0.0628028	86.3993	0.121056	80.0406	0.235127	64.3963	0.140627	76.0796											0.0628218	86.3982	0.129794	79.7242	0.238412	58.9728	0.147061	74.6037
									0.0623978	86.4225	0.120315	80.0958	0.233953	64.5305	0.139816	76.1502											0.0624167	86.4215	0.128998	79.7835	0.23738	59.1104	0.146236	74.6765
									0.061998	86.4455	0.119583	80.1504	0.232789	64.6635	0.139014	76.2201											0.0620168	86.4444	0.128211	79.842	0.236357	59.2471	0.145419	74.7487
									0.0616033	86.4682	0.118859	80.2043	0.231635	64.7953	0.138221	76.2894											0.061622	86.4671	0.127434	79.9	0.23534	59.3827	0.144612	74.8203
									0.0612136	86.4905	0.118145	80.2577	0.230491	64.9258	0.137436	76.358											0.0612321	86.4895	0.126667	79.9572	0.234331	59.5174	0.143813	74.8912
									0.0608287	86.5126	0.117438	80.3105	0.229356	65.0552	0.136661	76.4259											0.0608472	86.5116	0.125908	80.0138	0.233328	59.651	0.143023	74.9616
									0.0604487	86.5344	0.11674	80.3627	0.228231	65.1834	0.135893	76.4932											0.060467	86.5334	0.125158	80.0698	0.232333	59.7837	0.142242	75.0313
									0.0600734	86.556	0.11605	80.4143	0.227116	65.3103	0.135134	76.5599											0.0600916	86.5549	0.124417	80.1252	0.231345	59.9155	0.141468	75.1005
									0.0597027	86.5773	0.115369	80.4654	0.22601	65.4362	0.134384	76.626											0.0597208	86.5762	0.123685	80.18	0.230364	60.0463	0.140703	75.169
									0.0593365	86.5983	0.114695	80.5159	0.224914	65.5609	0.133641	76.6914											0.0593545	86.5972	0.122961	80.2341	0.229389	60.1761	0.139946	75.237
									0.0589748	86.619	0.114029	80.5658	0.223826	65.6844	0.132907	76.7563											0.0589927	86.618	0.122245	80.2877	0.228422	60.305	0.139197	75.3044
									0.0586175	86.6395	0.11337	80.6153	0.222748	65.8068	0.13218	76.8206											0.0586353	86.6385	0.121537	80.3407	0.227461	60.433	0.138456	75.3713
									0.0582644	86.6598	0.112719	80.6642	0.221679	65.9282	0.131461	76.8842											0.0582821	86.6588	0.120838	80.3931	0.226507	60.56	0.137723	75.4376
									0.0579156	86.6798	0.112075	80.7126	0.220619	66.0484	0.13075	76.9473											0.0579332	86.6788	0.120146	80.4449	0.22556	60.6861	0.136997	75.5033
									0.0575709	86.6996	0.111439	80.7605	0.219568	66.1676	0.130046	77.0098											0.0575884	86.6986	0.119462	80.4962	0.224619	60.8113	0.136278	75.5685
									0.0572303	86.7192	0.11081	80.8079	0.218526	66.2857	0.129349	77.0718											0.0572477	86.7182	0.118786	80.547	0.223685	60.9356	0.135567	75.6332
									0.0568937	86.7385	0.110187	80.8548	0.217492	66.4027	0.12866	77.1332											0.056911	86.7375	0.118118	80.5972	0.222757	61.0591	0.134863	75.6973
									0.0565611	86.7576	0.109572	80.9012	0.216467	66.5187	0.127978	77.194											0.0565783	86.7566	0.117456	80.6469	0.221836	61.1816	0.134166	75.7609
									0.0562323	86.7764	0.108963	80.9471	0.215451	66.6337	0.127303	77.2543											0.0562494	86.7754	0.116802	80.6961	0.220921	61.3032	0.133477	75.824
									0.0559073	86.7951	0.108361	80.9926	0.214443	66.7476	0.126634	77.3141											0.0559242	86.7941	0.116155	80.7447	0.220012	61.424	0.132794	75.8866
									0.055586	86.8135	0.107766	81.0376	0.213443	66.8605	0.125973	77.3733											0.0556029	86.8125	0.115516	80.7929	0.21911	61.5439	0.132118	75.9487
									0.0552684	86.8317	0.107177	81.0821	0.212451	66.9725	0.125318	77.4321											0.0552852	86.8308	0.114883	80.8405	0.218214	61.663	0.131448	76.0102
									0.0549543	86.8498	0.106594	81.1263	0.211468	67.0835	0.12467	77.4903											0.054971	86.8488	0.114256	80.8877	0.217324	61.7812	0.130786	76.0713
									0.0546439	86.8676	0.106018	81.1699	0.210493	67.1935	0.124029	77.548											0.0546605	86.8666	0.113637	80.9344	0.216441	61.8986	0.130129	76.1319
									0.0543369	86.8852	0.105447	81.2131	0.209526	67.3025	0.123394	77.6052											0.0543534	86.8842	0.113024	80.9806	0.215563	62.0151	0.12948	76.192
									0.0540333	86.9026	0.104883	81.2559	0.208566	67.4106	0.122765	77.6618											0.0540497	86.9017	0.112418	81.0263	0.214692	62.1308	0.128836	76.2516
									0.0537331	86.9198	0.104325	81.2983	0.207615	67.5177	0.122142	77.718											0.0537495	86.9189	0.111818	81.0716	0.213826	62.2457	0.128199	76.3108
									0.0534363	86.9369	0.103773	81.3403	0.206671	67.6239	0.121526	77.7738											0.0534525	86.9359	0.111224	81.1165	0.212967	62.3597	0.127568	76.3694
									0.0531426	86.9537	0.103226	81.3818	0.205735	67.7292	0.120916	77.829											0.0531588	86.9528	0.110637	81.1609	0.212113	62.473	0.126942	76.4277
									0.0528522	86.9704	0.102685	81.423	0.204806	67.8336	0.120311	77.8838											0.0528683	86.9695	0.110056	81.2048	0.211265	62.5854	0.126323	76.4854
									0.0525649	86.9869	0.10215	81.4637	0.203885	67.9372	0.119713	77.9381											0.0525809	86.9859	0.10948	81.2483	0.210423	62.6971	0.12571	76.5427
									0.0522808	87.0032	0.10162	81.5041	0.202972	68.0398	0.11912	77.9919											0.0522967	87.0023	0.108911	81.2914	0.209586	62.808	0.125103	76.5996
									0.0519997	87.0193	0.101095	81.5441	0.202065	68.1415	0.118533	78.0453											0.0520155	87.0184	0.108347	81.3341	0.208756	62.9181	0.124501	76.656
									0.0517216	87.0353	0.100576	81.5837	0.201166	68.2424	0.117952	78.0983											0.0517373	87.0343	0.107789	81.3764	0.207931	63.0274	0.123905	76.712
									0.0514464	87.051	0.100062	81.6229	0.200275	68.3424	0.117376	78.1508											0.051462	87.0501	0.107237	81.4182	0.207111	63.1359	0.123314	76.7676
									0.0511742	87.0667	0.0995537	81.6617	0.19939	68.4416	0.116805	78.2028											0.0511897	87.0658	0.10669	81.4597	0.206297	63.2437	0.122729	76.8227
									0.0509048	87.0821	0.0990502	81.7002	0.198512	68.5399	0.11624	78.2544											0.0509202	87.0812	0.106149	81.5007	0.205489	63.3508	0.122149	76.8774
									0.0506382	87.0974	0.0985516	81.7383	0.197641	68.6375	0.115681	78.3056											0.0506536	87.0965	0.105614	81.5414	0.204686	63.4571	0.121575	76.9317
									0.0503744	87.1125	0.0980581	81.7761	0.196778	68.7342	0.115126	78.3564											0.0503897	87.1117	0.105083	81.5817	0.203889	63.5626	0.121006	76.9855
									0.0501134	87.1275	0.0975694	81.8135	0.195921	68.8301	0.114577	78.4067											0.0501286	87.1266	0.104558	81.6216	0.203097	63.6674	0.120442	77.039
									0.049855	87.1423	0.0970855	81.8506	0.19507	68.9252	0.114033	78.4567											0.0498701	87.1415	0.104038	81.6611	0.20231	63.7715	0.119883	77.092
									0.0495993	87.157	0.0966063	81.8874	0.194227	69.0195	0.113494	78.5062											0.0496143	87.1561	0.103523	81.7002	0.201528	63.8749	0.119329	77.1447
									0.0493461	87.1715	0.0961319	81.9238	0.19339	69.113	0.11296	78.5553											0.0493611	87.1707	0.103013	81.739	0.200752	63.9776	0.11878	77.197
									0.0490956	87.1859	0.095662	81.9598	0.19256	69.2058	0.11243	78.6041											0.0491105	87.185	0.102508	81.7775	0.199981	64.0795	0.118236	77.2488
									0.0488476	87.2001	0.0951966	81.9956	0.191736	69.2978	0.111906	78.6524											0.0488624	87.1993	0.102008	81.8155	0.199215	64.1808	0.117697	77.3003
									0.048602	87.2142	0.0947358	82.031	0.190918	69.389	0.111386	78.7003											0.0486168	87.2134	0.101512	81.8533	0.198454	64.2813	0.117163	77.3514
									0.0483589	87.2282	0.0942793	82.0661	0.190107	69.4795	0.110871	78.7479											0.0483736	87.2273	0.101022	81.8907	0.197698	64.3812	0.116633	77.4021
									0.0481183	87.242	0.0938272	82.1009	0.189302	69.5693	0.110361	78.7951											0.0481329	87.2411	0.100536	81.9277	0.196947	64.4804	0.116108	77.4525
									0.04788	87.2556	0.0933793	82.1354	0.188503	69.6583	0.109855	78.8419											0.0478946	87.2548	0.100055	81.9644	0.196202	64.5789	0.115588	77.5024
									0.0476441	87.2692	0.0929357	82.1696	0.187711	69.7466	0.109354	78.8883											0.0476585	87.2683	0.0995779	82.0008	0.195461	64.6767	0.115072	77.552
									0.0474104	87.2826	0.0924963	82.2035	0.186924	69.8342	0.108857	78.9344											0.0474248	87.2817	0.0991056	82.0369	0.194725	64.7739	0.114561	77.6013
									0.0471791	87.2958	0.0920609	82.2371	0.186144	69.9211	0.108365	78.9801											0.0471934	87.295	0.0986377	82.0726	0.193994	64.8704	0.114054	77.6501
									0.04695	87.309	0.0916296	82.2704	0.185369	70.0073	0.107877	79.0254											0.0469643	87.3082	0.0981741	82.108	0.193267	64.9662	0.113552	77.6987
									0.0467231	87.322	0.0912023	82.3034	0.184601	70.0928	0.107393	79.0704											0.0467373	87.3212	0.0977149	82.1431	0.192546	65.0614	0.113053	77.7468
									0.0464984	87.3349	0.0907789	82.3361	0.183838	70.1776	0.106913	79.115											0.0465125	87.3341	0.0972599	82.1779	0.191829	65.156	0.112559	77.7946
									0.0462758	87.3476	0.0903594	82.3686	0.183081	70.2618	0.106438	79.1593											0.0462899	87.3468	0.096809	82.2124	0.191117	65.2499	0.11207	77.8421
									0.0460554	87.3603	0.0899438	82.4007	0.18233	70.3452	0.105967	79.2032											0.0460694	87.3595	0.0963623	82.2466	0.190409	65.3432	0.111584	77.8892

## Sheet: Figure5_C_D
Figure 5C	Gauss_Apo_PM_0	Gauss_Apo_PM_1	Gauss_Apo_PM_2	Gauss_Apo_PM_3	Gauss_cAMP_PM_0	Gauss_cAMP_PM_1	Gauss_cAMP_PM_2	Gauss_cAMP_PM_3	Gauss_cGMP_PM0	Gauss_cGMP_PM1	Gauss_cGMP_PM2	Gauss_cGMP_PM3		Figure 5D	Gauss_Apo_RB_0	Gauss_Apo_RB_1	Gauss_Apo_RB_2	Gauss_Apo_RB_3	Gauss_cAMP_RB_0	Gauss_cAMP_RB_1	Gauss_cAMP_RB_2	Gauss_cAMP_RB_3	Gauss_cGMP_RB0	Guass_cGMP_RB1	Gauss_cGMP_RB2	Gauss_cGMP_RB3
	1.71677e-11	7.22038e-11	6.69249e-11	3.2435e-11	0	0	0	0	2.42926e-11	2.54786e-11	2.52797e-11	2.55275e-11			1.30874e-14	8.87188e-14	7.09117e-14	2.32357e-13	0	0	0	0	4.70372e-14	4.68697e-14	5.03463e-14	4.68714e-14
	2.14518e-11	8.8874e-11	8.24638e-11	4.02626e-11	0	0	0	0	3.01453e-11	3.1617e-11	3.13702e-11	3.16776e-11			1.75337e-14	1.16543e-13	9.34399e-14	3.0253e-13	0	0	0	0	6.19993e-14	6.17786e-14	6.6361e-14	6.17808e-14
	2.67747e-11	1.09278e-10	1.01503e-10	4.99245e-11	0	0	0	0	3.73671e-11	3.91914e-11	3.88854e-11	3.92665e-11			2.34562e-14	1.52884e-13	1.22955e-13	3.93374e-13	0	0	0	0	8.16079e-14	8.13174e-14	8.7349e-14	8.13202e-14
	3.33806e-11	1.34225e-10	1.24806e-10	6.18372e-11	0	0	0	0	4.62683e-11	4.85272e-11	4.81483e-11	4.86202e-11			3.13334e-14	2.00284e-13	1.6157e-13	5.10822e-13	0	0	0	0	1.0727e-13	1.06888e-13	1.14816e-13	1.06892e-13
	4.15694e-11	1.64693e-10	1.53296e-10	7.65086e-11	0	0	0	0	5.72272e-11	6.00211e-11	5.95525e-11	6.01361e-11			4.17948e-14	2.62023e-13	2.12019e-13	6.62459e-13	0	0	0	0	1.40806e-13	1.40305e-13	1.50712e-13	1.4031e-13
	5.17087e-11	2.01866e-10	1.8809e-10	9.45573e-11	0	0	0	0	7.07043e-11	7.41563e-11	7.35773e-11	7.42984e-11			5.56674e-14	3.42327e-13	2.77837e-13	8.57974e-13	0	0	0	0	1.84573e-13	1.83915e-13	1.97557e-13	1.83922e-13
	6.42484e-11	2.47168e-10	2.30538e-10	1.16736e-10	0	0	0	0	8.72599e-11	9.15201e-11	9.08056e-11	9.16955e-11			7.40364e-14	4.46634e-13	3.63583e-13	1.10972e-12	0	0	0	0	2.41608e-13	2.40748e-13	2.58605e-13	2.40757e-13
	7.9739e-11	3.02319e-10	2.82266e-10	1.43958e-10	0	0	0	0	1.07574e-10	1.12826e-10	1.11945e-10	1.13042e-10			9.83228e-14	5.81929e-13	4.75135e-13	1.43345e-12	0	0	0	0	3.15832e-13	3.14708e-13	3.38051e-13	3.14719e-13
	9.88528e-11	3.69387e-10	3.45236e-10	1.77334e-10	0	0	0	0	1.32473e-10	1.3894e-10	1.37855e-10	1.39206e-10			1.30385e-13	7.57175e-13	6.20055e-13	1.84916e-12	0	0	0	0	4.12288e-13	4.1082e-13	4.41292e-13	4.10834e-13
	1.2241e-10	4.5086e-10	4.21806e-10	2.1821e-10	0	0	0	0	1.62956e-10	1.70911e-10	1.69577e-10	1.71239e-10			1.7265e-13	9.83856e-13	8.0806e-13	2.38227e-12	0	0	0	0	5.37458e-13	5.35544e-13	5.75268e-13	5.35563e-13
	1.5141e-10	5.49723e-10	5.14813e-10	2.68213e-10	0	0	0	0	2.00233e-10	2.10009e-10	2.0837e-10	2.10412e-10			2.28282e-13	1.27666e-12	1.05162e-12	3.06503e-12	0	0	0	0	6.99662e-13	6.97171e-13	7.48883e-13	6.97196e-13
	1.87068e-10	6.6956e-10	6.27664e-10	3.29313e-10	0	0	0	0	2.4577e-10	2.57769e-10	2.55757e-10	2.58263e-10			3.01398e-13	1.65435e-12	1.36669e-12	3.93826e-12	0	0	0	0	9.09561e-13	9.06323e-13	9.73549e-13	9.06355e-13
	2.30864e-10	8.14663e-10	7.64442e-10	4.03889e-10	0	0	0	0	3.01333e-10	3.16044e-10	3.13577e-10	3.1665e-10			3.9735e-13	2.14085e-12	1.77371e-12	5.05359e-12	0	0	0	0	1.1808e-12	1.17659e-12	1.26387e-12	1.17664e-12
	2.84592e-10	9.90171e-10	9.30042e-10	4.94811e-10	0	0	0	0	3.69053e-10	3.8707e-10	3.84049e-10	3.87812e-10			5.23084e-13	2.76665e-12	2.29877e-12	6.47621e-12	0	0	0	0	1.5308e-12	1.52535e-12	1.63849e-12	1.52541e-12
	3.50427e-10	1.20222e-09	1.13032e-09	6.05537e-10	0	0	0	0	4.51497e-10	4.7354e-10	4.69843e-10	4.74448e-10			6.87599e-13	3.57051e-12	2.97514e-12	8.28834e-12	0	0	0	0	1.98181e-12	1.97475e-12	2.12123e-12	1.97482e-12
	4.31005e-10	1.45815e-09	1.37227e-09	7.40229e-10	0	0	0	0	5.51755e-10	5.78693e-10	5.74175e-10	5.79802e-10			9.02534e-13	4.60167e-12	3.84521e-12	1.05935e-11	0	0	0	0	2.56215e-12	2.55303e-12	2.7424e-12	2.55312e-12
	5.29513e-10	1.76671e-09	1.66425e-09	9.03891e-10	0	0	0	0	6.73539e-10	7.06422e-10	7.00908e-10	7.07776e-10			1.18292e-12	5.92254e-12	4.96286e-12	1.35219e-11	0	0	0	0	3.30787e-12	3.29609e-12	3.54057e-12	3.29621e-12
	6.49802e-10	2.1383e-09	2.01621e-09	1.10253e-09	0	0	0	0	8.21304e-10	8.61401e-10	8.54676e-10	8.63052e-10			1.54816e-12	7.61219e-12	6.39652e-12	1.7237e-11	0	0	0	0	4.26472e-12	4.24954e-12	4.56474e-12	4.24969e-12
	7.96516e-10	2.58533e-09	2.44003e-09	1.34335e-09	0	0	0	0	1.00039e-09	1.04923e-09	1.04104e-09	1.05124e-09			2.02319e-12	9.77055e-12	8.23294e-12	2.19438e-11	0	0	0	0	5.49077e-12	5.47122e-12	5.87704e-12	5.47141e-12
	9.75253e-10	3.12254e-09	2.94981e-09	1.63497e-09	0	0	0	0	1.21719e-09	1.27662e-09	1.26665e-09	1.27907e-09			2.64013e-12	1.25238e-11	1.0582e-11	2.78989e-11	0	0	0	0	7.05952e-12	7.03439e-12	7.55616e-12	7.03464e-12
	1.19275e-09	3.7674e-09	3.56233e-09	1.98773e-09	0	0	0	0	1.47937e-09	1.55159e-09	1.53948e-09	1.55456e-09			3.44016e-12	1.60311e-11	1.35824e-11	3.54232e-11	0	0	0	0	9.06395e-12	9.03168e-12	9.7016e-12	9.032e-12
	1.45711e-09	4.54065e-09	4.29748e-09	2.41394e-09	0	0	0	0	1.79604e-09	1.88372e-09	1.86902e-09	1.88733e-09			4.47606e-12	2.04926e-11	1.74096e-11	4.49174e-11	0	0	0	0	1.16214e-11	1.158e-11	1.2439e-11	1.15805e-11
	1.77805e-09	5.46687e-09	5.17885e-09	2.92834e-09	0	0	0	0	2.17811e-09	2.28445e-09	2.26662e-09	2.28883e-09			5.81539e-12	2.61602e-11	2.22844e-11	5.68809e-11	0	0	0	0	1.48799e-11	1.4827e-11	1.59267e-11	1.48275e-11
	2.16723e-09	6.57509e-09	6.23438e-09	3.54846e-09	0	0	0	0	2.63858e-09	2.7674e-09	2.74579e-09	2.7727e-09			7.54442e-12	3.33497e-11	2.84846e-11	7.19358e-11	0	0	0	0	1.90258e-11	1.89581e-11	2.03643e-11	1.89587e-11
	2.63862e-09	7.89966e-09	7.49711e-09	4.29519e-09	0	0	0	0	3.19289e-09	3.34878e-09	3.32263e-09	3.35519e-09			9.77324e-12	4.24572e-11	3.63598e-11	9.0855e-11	0	0	0	0	2.42932e-11	2.42067e-11	2.60022e-11	2.42075e-11
	3.2089e-09	9.48109e-09	9.00605e-09	5.19338e-09	0	0	0	0	3.85943e-09	4.04786e-09	4.01626e-09	4.05561e-09			1.2642e-11	5.39782e-11	4.63481e-11	1.14598e-10	0	0	0	0	3.0976e-11	3.08657e-11	3.31552e-11	3.08668e-11
	3.89804e-09	1.13671e-08	1.08072e-08	6.2725e-09	0	0	0	0	4.66001e-09	4.88753e-09	4.84937e-09	4.89689e-09			1.63289e-11	6.85322e-11	5.89987e-11	1.44356e-10	0	0	0	0	3.94427e-11	3.93022e-11	4.22175e-11	3.93036e-11
	4.72984e-09	1.3614e-08	1.2955e-08	7.56756e-09	0	0	0	0	5.62051e-09	5.89492e-09	5.8489e-09	5.90622e-09			2.10603e-11	8.68919e-11	7.49984e-11	1.816e-10	0	0	0	0	5.01542e-11	4.99756e-11	5.36825e-11	4.99774e-11
	5.73265e-09	1.62879e-08	1.5513e-08	9.12e-09	0	0	0	0	6.77157e-09	7.10217e-09	7.04673e-09	7.11578e-09			2.7123e-11	1.1002e-10	9.52055e-11	2.28151e-10	0	0	0	0	6.36866e-11	6.34598e-11	6.81669e-11	6.34621e-11
	6.94023e-09	1.94665e-08	1.85566e-08	1.09789e-08	0	0	0	0	8.14944e-09	8.54731e-09	8.48058e-09	8.56369e-09			3.48798e-11	1.39115e-10	1.2069e-10	2.86256e-10	0	0	0	0	8.07585e-11	8.0471e-11	8.64399e-11	8.04739e-11
	8.39271e-09	2.32409e-08	2.21738e-08	1.32022e-08	0	0	0	0	9.79694e-09	1.02752e-08	1.0195e-08	1.02949e-08			4.47895e-11	1.75664e-10	1.52785e-10	3.58684e-10	0	0	0	0	1.02265e-10	1.01901e-10	1.0946e-10	1.01905e-10
	1.01377e-08	2.7718e-08	2.64681e-08	1.58583e-08	0	0	0	0	1.17646e-08	1.2339e-08	1.22427e-08	1.23627e-08			5.74305e-11	2.21513e-10	1.93148e-10	4.48845e-10	0	0	0	0	1.29321e-10	1.28861e-10	1.38419e-10	1.28865e-10
	1.22317e-08	3.30228e-08	3.15605e-08	1.9028e-08	0	0	0	0	1.41121e-08	1.48011e-08	1.46855e-08	1.48294e-08			7.35316e-11	2.78949e-10	2.43837e-10	5.60926e-10	0	0	0	0	1.63309e-10	1.62727e-10	1.74797e-10	1.62733e-10
	1.47416e-08	3.93014e-08	3.7593e-08	2.28062e-08	0	0	0	0	1.69094e-08	1.77349e-08	1.75965e-08	1.77689e-08			9.40092e-11	3.508e-10	3.07404e-10	7.0007e-10	0	0	0	0	2.05944e-10	2.05211e-10	2.20432e-10	2.05218e-10
	1.77464e-08	4.67247e-08	4.4731e-08	2.73047e-08	0	0	0	0	2.02391e-08	2.12272e-08	2.10614e-08	2.12678e-08			1.20014e-10	4.40557e-10	3.87006e-10	8.72574e-10	0	0	0	0	2.59351e-10	2.58428e-10	2.77597e-10	2.58437e-10
	2.13396e-08	5.54916e-08	5.31682e-08	3.26546e-08	0	0	0	0	2.41979e-08	2.53792e-08	2.51811e-08	2.54279e-08			1.52988e-10	5.52526e-10	4.86549e-10	1.08615e-09	0	0	0	0	3.26158e-10	3.24997e-10	3.49103e-10	3.25008e-10
	2.56314e-08	6.58342e-08	6.31298e-08	3.90101e-08	0	0	0	0	2.88994e-08	3.03103e-08	3.00737e-08	3.03684e-08			1.94737e-10	6.92008e-10	6.1085e-10	1.35021e-09	0	0	0	0	4.09607e-10	4.08148e-10	4.38422e-10	4.08163e-10
	3.07516e-08	7.80223e-08	7.48786e-08	4.65515e-08	0	0	0	0	3.44766e-08	3.61598e-08	3.58776e-08	3.62291e-08			2.47517e-10	8.65523e-10	7.65849e-10	1.67626e-09	0	0	0	0	5.13696e-10	5.11867e-10	5.49834e-10	5.11885e-10
	3.68529e-08	9.23696e-08	8.872e-08	5.54899e-08	0	0	0	0	4.10852e-08	4.30911e-08	4.27547e-08	4.31737e-08			3.14142e-10	1.08107e-09	9.58851e-10	2.07828e-09	0	0	0	0	6.43347e-10	6.41056e-10	6.88606e-10	6.41079e-10
	4.4115e-08	1.0924e-07	1.05009e-07	6.60721e-08	0	0	0	0	4.89071e-08	5.12948e-08	5.08944e-08	5.13931e-08			3.98119e-10	1.34846e-09	1.19883e-09	2.57332e-09	0	0	0	0	8.04607e-10	8.01742e-10	8.61211e-10	8.01771e-10
	5.27484e-08	1.29056e-07	1.24156e-07	7.85863e-08	0	0	0	0	5.81544e-08	6.09936e-08	6.05174e-08	6.11105e-08			5.03806e-10	1.67969e-09	1.49681e-09	3.18207e-09	0	0	0	0	1.0049e-09	1.00132e-09	1.07559e-09	1.00136e-09
	6.30003e-08	1.52307e-07	1.4664e-07	9.33683e-08	0	0	0	0	6.90745e-08	7.24468e-08	7.18813e-08	7.25857e-08			6.36618e-10	2.08945e-09	1.86627e-09	3.92962e-09	0	0	0	0	1.25332e-09	1.24885e-09	1.34149e-09	1.2489e-09
	7.51598e-08	1.79557e-07	1.73012e-07	1.10809e-07	0	0	0	0	8.19555e-08	8.59567e-08	8.52856e-08	8.61214e-08			8.03267e-10	2.59561e-09	2.32371e-09	4.84638e-09	0	0	0	0	1.56099e-09	1.55543e-09	1.6708e-09	1.55548e-09
	8.9565e-08	2.1146e-07	2.03912e-07	1.31364e-07	0	0	0	0	9.71321e-08	1.01874e-07	1.01079e-07	1.0207e-07			1.01206e-09	3.22001e-09	2.88928e-09	5.96912e-09	0	0	0	0	1.9415e-09	1.93459e-09	2.07808e-09	1.93465e-09
	1.06611e-07	2.4877e-07	2.40075e-07	1.55562e-07	0	0	0	0	1.14993e-07	1.20607e-07	1.19666e-07	1.20839e-07			1.27326e-09	3.98917e-09	3.58754e-09	7.34225e-09	0	0	0	0	2.41143e-09	2.40285e-09	2.58107e-09	2.40293e-09
	1.26757e-07	2.92355e-07	2.82352e-07	1.84014e-07	0	0	0	0	1.3599e-07	1.42629e-07	1.41516e-07	1.42903e-07			1.59952e-09	4.93533e-09	4.44839e-09	9.01931e-09	0	0	0	0	2.99097e-09	2.98032e-09	3.20139e-09	2.98043e-09
	1.5054e-07	3.43215e-07	3.31724e-07	2.17433e-07	0	0	0	0	1.60645e-07	1.68488e-07	1.67172e-07	1.68811e-07			2.00646e-09	6.09759e-09	5.5082e-09	1.10648e-08	0	0	0	0	3.70467e-09	3.69148e-09	3.9653e-09	3.69162e-09
	1.78584e-07	4.02499e-07	3.89316e-07	2.56639e-07	0	0	0	0	1.89562e-07	1.98816e-07	1.97264e-07	1.99197e-07			2.51325e-09	7.5233e-09	6.81109e-09	1.35562e-08	0	0	0	0	4.58234e-09	4.56603e-09	4.90471e-09	4.56619e-09
	2.11614e-07	4.71527e-07	4.56423e-07	3.02583e-07	0	0	0	0	2.23439e-07	2.34348e-07	2.32518e-07	2.34797e-07			3.14345e-09	9.26973e-09	8.41052e-09	1.65867e-08	0	0	0	0	5.66011e-09	5.63995e-09	6.05829e-09	5.64015e-09
	2.50469e-07	5.51813e-07	5.34532e-07	3.56361e-07	0	0	0	0	2.63083e-07	2.75927e-07	2.73773e-07	2.76456e-07			3.92592e-09	1.1406e-08	1.03712e-08	2.02678e-08	0	0	0	0	6.9817e-09	6.95685e-09	7.47287e-09	6.95709e-09
	2.96123e-07	6.45089e-07	6.25345e-07	4.19237e-07	0	0	0	0	3.09422e-07	3.24528e-07	3.21995e-07	3.2515e-07			4.896e-09	1.40155e-08	1.27713e-08	2.47332e-08	0	0	0	0	8.6e-09	8.56938e-09	9.205e-09	8.56968e-09
	3.49705e-07	7.5334e-07	7.30813e-07	4.92667e-07	0	0	0	0	3.63525e-07	3.81272e-07	3.78296e-07	3.82003e-07			6.09686e-09	1.71986e-08	1.57051e-08	3.01424e-08	0	0	0	0	1.05788e-08	1.05411e-08	1.1323e-08	1.05415e-08
	4.12515e-07	8.78831e-07	8.53164e-07	5.78325e-07	0	0	0	0	4.2662e-07	4.47449e-07	4.43956e-07	4.48306e-07			7.58116e-09	2.10758e-08	1.92862e-08	3.66862e-08	0	0	0	0	1.29949e-08	1.29486e-08	1.3909e-08	1.2949e-08
	4.86058e-07	1.02415e-06	9.94946e-07	6.78132e-07	0	0	0	0	5.0012e-07	5.24537e-07	5.20442e-07	5.25542e-07			9.41304e-09	2.5792e-08	2.36511e-08	4.45915e-08	0	0	0	0	1.59407e-08	1.58839e-08	1.70621e-08	1.58845e-08
	5.72065e-07	1.19224e-06	1.15906e-06	7.94292e-07	0	0	0	0	5.85641e-07	6.14233e-07	6.09438e-07	6.1541e-07			1.16705e-08	3.15205e-08	2.89639e-08	5.41288e-08	0	0	0	0	1.95274e-08	1.94578e-08	2.09011e-08	1.94585e-08
	6.72531e-07	1.38646e-06	1.34882e-06	9.29332e-07	0	0	0	0	6.85036e-07	7.18481e-07	7.12872e-07	7.19858e-07			1.44482e-08	3.84689e-08	3.54211e-08	6.5619e-08	0	0	0	0	2.3888e-08	2.38029e-08	2.55685e-08	2.38038e-08
	7.89749e-07	1.61063e-06	1.56798e-06	1.08614e-06	0	0	0	0	8.00425e-07	8.39503e-07	8.32949e-07	8.41112e-07			1.78609e-08	4.68851e-08	4.32581e-08	7.94432e-08	0	0	0	0	2.9182e-08	2.90781e-08	3.1235e-08	2.90791e-08
	9.2635e-07	1.86907e-06	1.82083e-06	1.26801e-06	0	0	0	1.4013e-45	9.34226e-07	9.79837e-07	9.72188e-07	9.81715e-07			2.20474e-08	5.70647e-08	5.2756e-08	9.60527e-08	0	0	0	0	3.56001e-08	3.54733e-08	3.81045e-08	3.54746e-08
	1.08535e-06	2.1667e-06	2.11221e-06	1.47872e-06	0	0	0	8.40779e-45	1.0892e-06	1.14238e-06	1.13346e-06	1.14457e-06			2.71754e-08	6.93601e-08	6.42505e-08	1.15981e-07	0	0	0	0	4.33697e-08	4.32153e-08	4.64207e-08	4.32168e-08
	1.27021e-06	2.50908e-06	2.44762e-06	1.72256e-06	0	0	0	7.9874e-44	1.2685e-06	1.33043e-06	1.32004e-06	1.33298e-06			3.34472e-08	8.41898e-08	7.81413e-08	1.3986e-07	0	0	0	0	5.2762e-08	5.25742e-08	5.64738e-08	5.2576e-08
	1.48488e-06	2.90251e-06	2.8333e-06	2.0044e-06	0	0	0	7.32879e-43	1.47569e-06	1.54774e-06	1.53565e-06	1.5507e-06			4.11064e-08	1.02051e-07	9.49041e-08	1.68431e-07	0	0	0	0	6.40998e-08	6.38715e-08	6.86091e-08	6.38738e-08
	1.73386e-06	3.35411e-06	3.27629e-06	2.32981e-06	0	0	0	6.51324e-42	1.71485e-06	1.79857e-06	1.78453e-06	1.80202e-06			5.04456e-08	1.23533e-07	1.15104e-07	2.02571e-07	0	0	0	0	7.77663e-08	7.74894e-08	8.32371e-08	7.74921e-08
	2.02232e-06	3.87189e-06	3.78452e-06	2.70507e-06	0	0	0	5.64835e-41	1.99059e-06	2.08777e-06	2.07147e-06	2.09178e-06			6.18161e-08	1.49334e-07	1.3941e-07	2.4331e-07	1.4013e-45	0	0	0	9.42162e-08	9.38808e-08	1.00844e-07	9.38841e-08
	2.35609e-06	4.4649e-06	4.36696e-06	3.13735e-06	0	0	0	4.77656e-40	2.30814e-06	2.42083e-06	2.40193e-06	2.42547e-06			7.56389e-08	1.80278e-07	1.68615e-07	2.91855e-07	1.12104e-44	0	0	0	1.13988e-07	1.13582e-07	1.22007e-07	1.13586e-07
	2.74186e-06	5.14333e-06	5.03372e-06	3.63471e-06	0	0	0	3.93886e-39	2.67342e-06	2.80394e-06	2.78205e-06	2.80931e-06			9.24174e-08	2.17337e-07	2.03657e-07	3.49623e-07	1.21913e-43	0	0	0	1.37719e-07	1.37229e-07	1.47408e-07	1.37234e-07
	3.18719e-06	5.91861e-06	5.79613e-06	4.20631e-06	0	0	0	3.16727e-38	3.09312e-06	3.24413e-06	3.2188e-06	3.25035e-06			1.12753e-07	2.61658e-07	2.45642e-07	4.18272e-07	1.292e-42	0	0	0	1.66161e-07	1.65569e-07	1.7785e-07	1.65575e-07
	3.70067e-06	6.80359e-06	6.66696e-06	4.86248e-06	0	0	0	2.48346e-37	3.5748e-06	3.74932e-06	3.72005e-06	3.75651e-06			1.37362e-07	3.14587e-07	2.95874e-07	4.99738e-07	1.32311e-41	0	0	0	2.00199e-07	1.99487e-07	2.14283e-07	1.99494e-07
	4.29202e-06	7.81267e-06	7.66051e-06	5.61484e-06	0	0	0	1.89883e-36	4.12696e-06	4.32845e-06	4.29466e-06	4.33674e-06			1.67097e-07	3.77709e-07	3.55885e-07	5.96284e-07	1.31673e-40	0	0	0	2.40878e-07	2.4002e-07	2.57823e-07	2.40028e-07
	4.97225e-06	8.96199e-06	8.79281e-06	6.47651e-06	0	0	0	1.41571e-35	4.75921e-06	4.99156e-06	4.95259e-06	5.00113e-06			2.02972e-07	4.52879e-07	4.27477e-07	7.1054e-07	1.27322e-39	0	0	0	2.89421e-07	2.88391e-07	3.09782e-07	2.88401e-07
	5.75379e-06	1.02696e-05	1.00818e-05	7.46224e-06	0	0	0	1.02924e-34	5.48231e-06	5.74996e-06	5.70508e-06	5.76098e-06			2.46189e-07	5.42269e-07	5.12761e-07	8.45571e-07	1.19628e-38	0	0	0	3.47267e-07	3.4603e-07	3.71697e-07	3.46043e-07
	6.65066e-06	1.17556e-05	1.15475e-05	8.58858e-06	0	0	4.2039e-45	7.29662e-34	6.30837e-06	6.61635e-06	6.5647e-06	6.62903e-06			2.98172e-07	6.4842e-07	6.14211e-07	1.00493e-06	1.09216e-37	0	0	0	4.16099e-07	4.14617e-07	4.45371e-07	4.14632e-07
	7.67864e-06	1.34424e-05	1.32123e-05	9.87411e-06	0	0	6.5861e-44	5.04408e-33	7.25096e-06	7.60496e-06	7.54559e-06	7.61954e-06			3.60604e-07	7.74294e-07	7.34716e-07	1.19275e-06	9.68865e-37	0	0	0	4.97886e-07	4.96113e-07	5.32912e-07	4.96131e-07
	8.85552e-06	1.53552e-05	1.51012e-05	1.13396e-05	0	0	8.632e-43	3.40017e-32	8.32527e-06	8.73173e-06	8.66356e-06	8.74846e-06			4.3547e-07	9.23344e-07	8.77651e-07	1.4138e-06	8.3515e-36	0	0	0	5.94925e-07	5.92807e-07	6.36778e-07	5.92828e-07
	1.02012e-05	1.75217e-05	1.72418e-05	1.30084e-05	0	0	1.10268e-41	2.235e-31	9.54831e-06	1.00145e-05	9.93629e-06	1.00337e-05			5.2511e-07	1.09959e-06	1.04694e-06	1.67361e-06	6.99503e-35	0	0	0	7.09897e-07	7.07369e-07	7.59838e-07	7.07394e-07
	1.17382e-05	1.99728e-05	1.9665e-05	1.49064e-05	0	0	1.36056e-40	1.43256e-30	1.0939e-05	1.14731e-05	1.13835e-05	1.14951e-05			6.32278e-07	1.30769e-06	1.24717e-06	1.97854e-06	5.69297e-34	0	0	0	8.45917e-07	8.42905e-07	9.05427e-07	8.42935e-07
	1.34915e-05	2.27429e-05	2.2405e-05	1.70626e-05	0	0	1.62206e-39	8.95373e-30	1.25186e-05	1.31298e-05	1.30273e-05	1.3155e-05			7.60204e-07	1.55305e-06	1.48363e-06	2.33593e-06	4.50206e-33	5.60519e-45	0	0	1.00661e-06	1.00302e-06	1.07742e-06	1.00306e-06
	1.54891e-05	2.58699e-05	2.54998e-05	1.95093e-05	0	0	1.86863e-38	5.457e-29	1.43106e-05	1.50093e-05	1.48921e-05	1.50381e-05			9.12678e-07	1.84195e-06	1.7625e-06	2.75424e-06	3.45946e-32	8.12753e-44	0	0	1.19617e-06	1.19191e-06	1.28032e-06	1.19195e-06
	1.77625e-05	2.9396e-05	2.89914e-05	2.22824e-05	0	0	2.08011e-37	3.24311e-28	1.63413e-05	1.71391e-05	1.70053e-05	1.71719e-05			1.09413e-06	2.18161e-06	2.09088e-06	3.24316e-06	2.58303e-31	1.25276e-42	0	0	1.41946e-06	1.41441e-06	1.51932e-06	1.41446e-06
	2.03466e-05	3.33676e-05	3.29262e-05	2.54219e-05	0	0	2.23745e-36	1.87944e-27	1.86396e-05	1.95496e-05	1.9397e-05	1.95871e-05			1.30974e-06	2.58039e-06	2.47703e-06	3.81384e-06	1.87402e-30	1.84691e-41	0	0	1.68212e-06	1.67613e-06	1.80045e-06	1.67619e-06
	2.32803e-05	3.78359e-05	3.73554e-05	2.89719e-05	0	0	2.32557e-35	1.06206e-26	2.1238e-05	2.22749e-05	2.2101e-05	2.23176e-05			1.56556e-06	3.0479e-06	2.93043e-06	4.479e-06	1.32112e-29	2.62158e-40	0	0	1.99062e-06	1.98353e-06	2.13066e-06	1.9836e-06
	2.66069e-05	4.28575e-05	4.23357e-05	3.29815e-05	0	0	2.33567e-34	5.85238e-26	2.41721e-05	2.53523e-05	2.51543e-05	2.54008e-05			1.8686e-06	3.59521e-06	3.46204e-06	5.25322e-06	9.0497e-29	3.58075e-39	0	0	2.35244e-06	2.34407e-06	2.51794e-06	2.34415e-06
	3.03745e-05	4.84944e-05	4.79291e-05	3.75049e-05	0	0	2.26673e-33	3.14464e-25	2.74815e-05	2.88232e-05	2.85982e-05	2.88785e-05			2.22704e-06	4.23504e-06	4.08444e-06	6.15313e-06	6.02352e-28	4.70638e-38	0	0	2.7762e-06	2.76631e-06	2.9715e-06	2.76641e-06
	3.46365e-05	5.48152e-05	5.42042e-05	4.26019e-05	0	0	2.12566e-32	1.64766e-24	3.12098e-05	3.27336e-05	3.2478e-05	3.27963e-05			2.65036e-06	4.98194e-06	4.81208e-06	7.19767e-06	3.89574e-27	5.95255e-37	0	0	3.27176e-06	3.26011e-06	3.50193e-06	3.26023e-06
	3.9452e-05	6.18946e-05	6.12359e-05	4.83387e-05	0	0	1.92617e-31	8.41828e-24	3.54052e-05	3.71338e-05	3.68439e-05	3.72049e-05			3.14953e-06	5.85258e-06	5.66152e-06	8.4084e-06	2.44824e-26	7.24473e-36	0	0	3.85046e-06	3.83675e-06	4.12134e-06	3.83689e-06
	4.48862e-05	6.98148e-05	6.91067e-05	5.47879e-05	0	0	1.68656e-30	4.19407e-23	4.01206e-05	4.20794e-05	4.17509e-05	4.216e-05			3.73725e-06	6.86601e-06	6.6517e-06	9.80982e-06	1.495e-25	8.48484e-35	0	0	4.52526e-06	4.50915e-06	4.84361e-06	4.50931e-06
	5.10113e-05	7.86658e-05	7.79065e-05	6.20296e-05	0	0	1.42698e-29	2.03754e-22	4.54143e-05	4.76315e-05	4.72597e-05	4.77228e-05			4.42816e-06	8.04397e-06	7.80428e-06	1.14297e-05	8.8706e-25	9.56242e-34	0	0	5.31097e-06	5.29206e-06	5.6846e-06	5.29225e-06
	5.79068e-05	8.85456e-05	8.7734e-05	7.01515e-05	0	0	1.16664e-28	9.65239e-22	5.13502e-05	5.38572e-05	5.34368e-05	5.39605e-05			5.23914e-06	9.41118e-06	9.14392e-06	1.32994e-05	5.11433e-24	1.03704e-32	0	0	6.2245e-06	6.20233e-06	6.66239e-06	6.20255e-06
	6.56603e-05	9.95615e-05	9.86967e-05	7.925e-05	0	0	9.21648e-28	4.45883e-21	5.79985e-05	6.08301e-05	6.03552e-05	6.09467e-05			6.18958e-06	1.09958e-05	1.06987e-05	1.54546e-05	2.86515e-23	1.08224e-31	0	0	7.28508e-06	7.25914e-06	7.79759e-06	7.2594e-06
	7.43678e-05	0.00011183	0.000110912	8.94305e-05	0	0	7.03556e-27	2.00847e-20	6.54359e-05	6.86306e-05	6.80949e-05	6.87622e-05			7.30175e-06	1.28297e-05	1.25006e-05	1.79353e-05	1.55966e-22	1.08682e-30	0	0	8.5146e-06	8.48429e-06	9.11361e-06	8.48459e-06
	8.4135e-05	0.000125479	0.000124506	0.000100808	0	0	5.18966e-26	8.822e-20	7.37463e-05	7.73468e-05	7.6743e-05	7.7495e-05			8.60118e-06	1.49491e-05	1.45858e-05	2.07866e-05	8.24969e-22	1.05025e-29	4.2039e-45	0	9.93789e-06	9.90251e-06	1.0637e-05	9.90286e-06
	9.50776e-05	0.000140645	0.00013962	0.000113509	0	0	3.69901e-25	3.77857e-19	8.30213e-05	8.70745e-05	8.63948e-05	8.72414e-05			1.01171e-05	1.7395e-05	1.69953e-05	2.40595e-05	4.24002e-21	9.76633e-29	1.44334e-43	0	1.15831e-05	1.15418e-05	1.23979e-05	1.15422e-05
	0.000107322	0.000157478	0.000156402	0.00012767	0	0	2.54765e-24	1.57814e-18	9.33605e-05	9.79185e-05	9.71541e-05	9.81062e-05			1.18827e-05	2.02134e-05	1.97755e-05	2.78108e-05	2.1175e-20	8.73922e-28	4.25294e-42	0	1.3482e-05	1.3434e-05	1.44304e-05	1.34344e-05
	0.000121007	0.000176141	0.000175016	0.000143441	0	0	1.6955e-23	6.42717e-18	0.000104872	0.000109993	0.000109134	0.000110203			1.39361e-05	2.34565e-05	2.29787e-05	3.21046e-05	1.02755e-19	7.52517e-27	1.18129e-40	0	1.56705e-05	1.56147e-05	1.67729e-05	1.56153e-05
	0.000136282	0.000196809	0.000195638	0.000160983	0	0	1.09035e-22	2.55243e-17	0.000117675	0.00012342	0.000122457	0.000123657			1.63204e-05	2.71828e-05	2.6664e-05	3.70123e-05	4.84511e-19	6.23538e-26	3.09136e-39	0	1.81891e-05	1.81244e-05	1.94687e-05	1.8125e-05
	0.000153313	0.00021967	0.000218459	0.000180472	0	0	6.77544e-22	9.88426e-17	0.000131896	0.000138336	0.000137256	0.000138601			1.90848e-05	3.14583e-05	3.08975e-05	4.26138e-05	2.21988e-18	4.97179e-25	7.62267e-38	0	2.10834e-05	2.10083e-05	2.25666e-05	2.10091e-05
	0.000172278	0.000244929	0.000243683	0.000202099	0	0	4.06834e-21	3.73244e-16	0.000147674	0.000154884	0.000153675	0.000155181			2.22847e-05	3.63567e-05	3.57537e-05	4.89983e-05	9.88281e-18	3.81474e-24	1.77104e-36	0	2.44045e-05	2.43176e-05	2.61213e-05	2.43185e-05
	0.000193369	0.000272805	0.000271532	0.000226071	4.2039e-45	0	2.36049e-20	1.37436e-15	0.000165159	0.000173223	0.00017187	0.000173555			2.59832e-05	4.19605e-05	4.1316e-05	5.62649e-05	4.27518e-17	2.81656e-23	3.87717e-35	0	2.82097e-05	2.81093e-05	3.01942e-05	2.81103e-05
	0.000216798	0.000303535	0.000302244	0.000252608	2.5924e-43	0	1.32341e-19	4.93474e-15	0.000184512	0.00019352	0.00019201	0.000193891			3.02512e-05	4.83622e-05	4.76778e-05	6.45237e-05	1.79702e-16	2.00114e-22	7.9977e-34	0	3.25632e-05	3.24472e-05	3.4854e-05	3.24484e-05
	0.000242792	0.000337371	0.000336074	0.000281952	1.26972e-41	0	7.16957e-19	1.72777e-14	0.000205907	0.00021596	0.000214274	0.000216374			3.51688e-05	5.56647e-05	5.49432e-05	7.3897e-05	7.33962e-16	1.36816e-21	1.55446e-32	0	3.75366e-05	3.7403e-05	4.01773e-05	3.74043e-05
	0.000271595	0.000374585	0.000373295	0.00031436	5.75698e-40	0	3.75317e-18	5.89885e-14	0.000229532	0.000240739	0.000238859	0.0002412			4.08261e-05	6.39826e-05	6.32282e-05	8.45201e-05	2.91286e-15	9.00122e-21	2.84682e-31	0	4.32099e-05	4.3056e-05	4.62497e-05	4.30576e-05
	0.000303472	0.000415466	0.000414199	0.000350109	2.41125e-38	0	1.8985e-17	1.96384e-13	0.000255588	0.000268066	0.000265974	0.00026858			4.73241e-05	7.34432e-05	7.26621e-05	9.65427e-05	1.12328e-14	5.69859e-20	4.91252e-30	0	4.96719e-05	4.94951e-05	5.31663e-05	4.94968e-05
	0.000338708	0.000460324	0.0004591	0.000389496	9.32883e-37	0	9.27958e-17	6.37531e-13	0.00028429	0.00029817	0.000295842	0.000298741			5.47763e-05	8.4188e-05	8.33883e-05	0.00011013	4.20903e-14	3.47166e-19	7.98754e-29	0	5.70215e-05	5.68185e-05	6.1033e-05	5.68205e-05
	0.000377608	0.00050949	0.000508329	0.000432839	3.3339e-35	0	4.38282e-16	2.01816e-12	0.00031587	0.000331291	0.000328705	0.000331926			6.33093e-05	9.63734e-05	9.55656e-05	0.000125463	1.53249e-13	2.03521e-18	1.22373e-27	0	6.53682e-05	6.51354e-05	6.99668e-05	6.51377e-05
	0.000420501	0.000563313	0.000562241	0.000480479	1.10057e-33	0	2.00025e-15	6.22969e-12	0.000350573	0.000367689	0.000364818	0.000368393			7.30646e-05	0.000110172	0.00010937	0.000142742	5.42176e-13	1.14811e-17	1.76654e-26	0	7.48331e-05	7.45667e-05	8.00976e-05	7.45693e-05
	0.000467737	0.000622168	0.000621213	0.000532779	3.35597e-32	0	8.82109e-15	1.87515e-11	0.000388664	0.000407639	0.000404457	0.000408421			8.41999e-05	0.000125775	0.000124996	0.000162186	1.86382e-12	6.23247e-17	2.40285e-25	3.22299e-44	8.55502e-05	8.52456e-05	9.15686e-05	8.52486e-05
	0.000519693	0.00068645	0.000685645	0.000590124	9.4528e-31	0	3.75895e-14	5.50381e-11	0.000430422	0.000451436	0.000447912	0.000452301			9.68904e-05	0.000143393	0.000142656	0.000184035	6.22577e-12	3.25567e-16	3.07959e-24	2.97075e-42	9.7667e-05	9.73193e-05	0.000104538	9.73227e-05
	0.000576768	0.000756577	0.000755958	0.000652926	2.45947e-29	0	1.54781e-13	1.57525e-10	0.000476146	0.000499392	0.000495493	0.000500349			0.000111331	0.000163255	0.000162587	0.000208552	2.02072e-11	1.63653e-15	3.71898e-23	2.41658e-40	0.000111346	0.00011095	0.000119179	0.000110954
	0.000639388	0.000832991	0.0008326	0.00072162	5.911e-28	0	6.15849e-13	4.39634e-10	0.00052615	0.000551838	0.00054753	0.000552895			0.000127736	0.000185616	0.000185047	0.000236022	6.37298e-11	7.91606e-15	4.23175e-22	1.77135e-38	0.000126766	0.000126314	0.000135684	0.000126319
	0.000708008	0.000916159	0.000916042	0.000796668	1.31226e-26	0	2.36776e-12	1.19644e-09	0.00058077	0.000609124	0.000604369	0.000610292			0.000146345	0.000210752	0.000210319	0.000266758	1.953e-10	3.68466e-14	4.53712e-21	1.17009e-36	0.000144121	0.000143608	0.00015426	0.000143613
	0.000783107	0.00100657	0.00100678	0.000878557	2.69103e-25	0	8.79646e-12	3.17505e-09	0.000640359	0.000671623	0.00066638	0.00067291			0.00016742	0.000238967	0.000238712	0.000301099	5.8155e-10	1.6504e-13	4.58358e-20	6.96527e-35	0.000163627	0.000163044	0.000175138	0.00016305
	0.000865194	0.00110474	0.00110534	0.000967803	5.09747e-24	0	3.1578e-11	8.21612e-09	0.00070529	0.000739724	0.000733949	0.000741142			0.00019125	0.000270589	0.000270564	0.00033941	1.68265e-09	7.11349e-13	4.36309e-19	3.73652e-33	0.000185516	0.000184855	0.000198567	0.000184862
	0.000954807	0.00121121	0.00121225	0.00106495	8.9193e-23	0	1.09539e-10	2.0732e-08	0.000775956	0.000813839	0.000807486	0.000815399			0.000218153	0.000305979	0.000306242	0.000382091	4.73071e-09	2.95039e-12	3.91334e-18	1.80636e-31	0.000210042	0.000209294	0.000224819	0.000209302
	0.00105251	0.00132655	0.00132811	0.00117056	1.4416e-21	0	3.67162e-10	5.10121e-08	0.000852768	0.000894401	0.000887419	0.000896116			0.000248476	0.000345527	0.000346146	0.000429571	1.29236e-08	1.17755e-11	3.30724e-17	7.86952e-30	0.000237483	0.000236637	0.00025419	0.000236646
	0.00115891	0.00145134	0.0014535	0.00128523	2.15228e-20	0	1.1892e-09	1.22395e-07	0.000936158	0.000981863	0.000974198	0.000983745			0.0002826	0.000389655	0.00039071	0.000482312	3.43053e-08	4.52253e-11	2.6336e-16	3.08959e-28	0.000268138	0.000267183	0.000287001	0.000267192
	0.00127462	0.00158621	0.00158904	0.0014096	2.9682e-19	0	3.72183e-09	2.86359e-07	0.00102658	0.0010767	0.00106829	0.00107876			0.000320942	0.00043882	0.000440402	0.000540814	8.84841e-08	1.67142e-10	1.97604e-15	1.09311e-26	0.000302331	0.000301255	0.0003236	0.000301266
	0.0014003	0.00173178	0.00173538	0.00154431	3.78116e-18	0	1.12555e-08	6.53306e-07	0.0011245	0.0011794	0.0011702	0.00118166			0.000363953	0.000493516	0.000495728	0.000605609	2.21765e-07	5.94422e-10	1.39704e-14	3.48523e-25	0.000340415	0.000339203	0.000364363	0.000339215
	0.00153663	0.00188872	0.0018932	0.00169003	4.44934e-17	0	3.28913e-08	1.45338e-06	0.00123042	0.00129049	0.00128042	0.00129297			0.000412124	0.000554273	0.000557234	0.000677272	5.40062e-07	2.03426e-09	9.30646e-14	1.0014e-23	0.000382766	0.000381403	0.000409694	0.000381417
	0.00168434	0.00205772	0.00206318	0.00184749	4.83622e-16	0	9.2876e-08	3.15284e-06	0.00134484	0.0014105	0.00139949	0.0014132			0.00046599	0.000621663	0.000625506	0.000756414	1.27796e-06	6.69914e-09	5.84152e-13	2.59294e-22	0.000429792	0.000428262	0.000460028	0.000428277
	0.00184416	0.00223948	0.00224604	0.00201739	4.85573e-15	0	2.53415e-07	6.6693e-06	0.00146831	0.00153999	0.00152797	0.00154294			0.000526126	0.000696297	0.000701174	0.000843688	2.93844e-06	2.12293e-08	3.45486e-12	6.05043e-21	0.000481929	0.000480213	0.000515833	0.00048023
	0.00201686	0.00243474	0.00244253	0.00220052	4.50342e-14	0	6.6814e-07	1.37568e-05	0.00160136	0.00167954	0.00166643	0.00168276			0.000593154	0.00077883	0.000784909	0.000939788	6.56508e-06	6.47373e-08	1.92531e-11	1.27229e-19	0.000539645	0.000537723	0.000577609	0.000537743
	0.00220325	0.00264424	0.00265339	0.00239763	3.85807e-13	0	1.70219e-06	2.76702e-05	0.0017446	0.00182976	0.00181548	0.00183326			0.000667745	0.000869959	0.000877431	0.00104545	1.42524e-05	1.89966e-07	1.01096e-10	2.411e-18	0.000603439	0.000601291	0.00064589	0.000601312
	0.00240415	0.00286875	0.00287941	0.00260955	3.05306e-12	0	4.19042e-06	5.42706e-05	0.00189867	0.00199132	0.00197578	0.00199513			0.000750617	0.000970428	0.000979504	0.00116146	3.00647e-05	5.36416e-07	5.00189e-10	4.11731e-17	0.000673847	0.000671448	0.00072125	0.000671472
	0.00262041	0.00310904	0.00312137	0.00283708	2.23173e-11	0	9.96809e-06	0.000103795	0.00206432	0.00216498	0.0021481	0.00216913			0.000842541	0.00108103	0.00109194	0.00128863	6.16242e-05	1.45757e-06	2.33184e-09	6.33635e-16	0.000751444	0.000748769	0.000804301	0.000748795
	0.0028529	0.00336592	0.00338009	0.00308107	1.5069e-10	0	2.29125e-05	0.000193573	0.00224257	0.00235173	0.00233343	0.00235623			0.000944341	0.00120259	0.00121561	0.00142784	0.000122735	3.81118e-06	1.0243e-08	8.78765e-15	0.000836859	0.000833881	0.00089571	0.00083391
	0.0031025	0.0036402	0.00365637	0.00334239	9.39872e-10	0	5.0891e-05	0.000352022	0.0024349	0.00255299	0.00253319	0.00255785			0.00105689	0.001336	0.0013514	0.00157999	0.000237526	9.58942e-06	4.23954e-08	1.09828e-13	0.000930817	0.000927506	0.00099623	0.000927539
	0.00337014	0.00393268	0.00395106	0.00362189	5.4149e-09	0	0.000109223	0.000624243	0.00264387	0.00277109	0.00274975	0.00277633			0.00118113	0.00148219	0.0015003	0.00174605	0.00044666	2.32182e-05	1.65339e-07	1.23698e-12	0.00103424	0.00103056	0.00110678	0.0010306
	0.00365674	0.0042442	0.00426497	0.00392047	2.88172e-08	0	0.000226514	0.00107943	0.0028741	0.00301017	0.00298735	0.00301577			0.00131805	0.00164214	0.0016633	0.00192702	0.000816144	5.40962e-05	6.07571e-07	1.25551e-11	0.00114847	0.00114442	0.00122867	0.00114446
	0.00396322	0.00457558	0.00459896	0.00423902	1.41662e-07	0	0.000453924	0.0018201	0.0031341	0.00327778	0.00325368	0.0032837			0.00146868	0.00181687	0.00184146	0.00212392	0.00144904	0.000121285	2.1037e-06	1.14838e-10	0.0012759	0.00127144	0.00136404	0.00127149
	0.00429055	0.00492764	0.00495385	0.00457843	6.43267e-07	0	0.000878975	0.00299263	0.00343936	0.00358755	0.0035627	0.00359365			0.00163415	0.00200746	0.00203589	0.00233786	0.00249987	0.000261669	6.86331e-06	9.46588e-10	0.00142113	0.00141629	0.00151692	0.00141633
	0.00463967	0.00530122	0.00533049	0.0049396	2.69817e-06	0	0.00164466	0.00479809	0.00381717	0.0039634	0.00393888	0.00396943			0.00181559	0.00221502	0.00224774	0.00256994	0.00419063	0.00054325	2.10984e-05	7.03142e-09	0.00159349	0.00158834	0.00169525	0.00158839
	0.00501153	0.00569712	0.00572969	0.00532342	1.04541e-05	0	0.00297361	0.00750138	0.00431357	0.00444564	0.00442349	0.00445108			0.00201423	0.00244072	0.00247821	0.00282133	0.00682597	0.0010853	6.11123e-05	4.70688e-08	0.00181165	0.00180643	0.00191477	0.00180648
	0.00540709	0.00611615	0.00615226	0.00573079	3.74148e-05	0	0.00519513	0.011436	0.00500254	0.00509893	0.00508277	0.0051029			0.00223134	0.00268575	0.00272854	0.00309322	0.0108037	0.00208642	0.000166791	2.83943e-07	0.00211162	0.00210686	0.00220567	0.00210691
	0.00582729	0.0065591	0.00659902	0.00616257	0.000123691	0	0.00877034	0.0170005	0.00599662	0.0060216	0.00601741	0.00602263			0.00246825	0.00295135	0.003	0.00338683	0.0166152	0.00385973	0.000428925	1.54361e-06	0.0025593	0.00255608	0.002623	0.00255611
	0.00627305	0.00702673	0.00707073	0.00661963	0.000377723	0	0.0143068	0.0246438	0.00745699	0.00735444	0.00737163	0.00735021			0.00272631	0.00323881	0.00329392	0.00370341	0.0248292	0.00687093	0.00103933	7.56225e-06	0.00326815	0.0032685	0.0032614	0.00326849
	0.00674529	0.00751978	0.00756814	0.0071028	0.00106548	0	0.0225515	0.0348347	0.00959948	0.00928587	0.00933847	0.00927296			0.00300695	0.00354942	0.00361164	0.00404423	0.0360532	0.01177	0.00237297	3.33867e-05	0.00442077	0.00442824	0.00427306	0.00442817
	0.00724489	0.00803897	0.00809196	0.00761288	0.00277625	0	0.034349	0.0480148	0.0126913	0.0120493	0.0121569	0.0120228			0.00331164	0.00388452	0.00395453	0.00441057	0.0508684	0.0194017	0.00510498	0.000132832	0.00628971	0.00631019	0.00588504	0.00630998
	0.00777272	0.00858497	0.0086429	0.00815067	0.00668207	0	0.0505545	0.0645349	0.0170332	0.0159071	0.0160959	0.0158607			0.00364187	0.00424548	0.004324	0.00480375	0.0697391	0.0307756	0.0103481	0.000476257	0.0092487	0.00929122	0.00840862	0.0092908
	0.00832959	0.00915842	0.00922157	0.00871689	0.014856	0	0.0718972	0.084581	0.0229216	0.0211181	0.0214206	0.0210439			0.00399918	0.00463366	0.00472146	0.00522506	0.0929027	0.046976	0.0197648	0.00153882	0.0137611	0.0138386	0.0122296	0.0138378
	0.00891628	0.00975989	0.00982857	0.00931223	0.0305092	0	0.0988032	0.108096	0.030591	0.0278872	0.0283407	0.0277759			0.00438513	0.00505045	0.00514833	0.00567581	0.120255	0.0689999	0.0355704	0.00448067	0.0203311	0.0204608	0.0177679	0.0204595
	0.00953352	0.0103899	0.0104645	0.00993734	0.0578761	0	0.131201	0.134711	0.0401406	0.0363009	0.0369449	0.0361428			0.00480129	0.00549723	0.00560605	0.0061573	0.151253	0.0975266	0.0603182	0.0117572	0.0294088	0.0296117	0.0253984	0.0296097
	0.010182	0.011049	0.0111297	0.0105928	0.101416	0	0.168348	0.163702	0.0514583	0.0462615	0.0471331	0.0460476			0.00524927	0.00597539	0.00609603	0.0066708	0.184854	0.132648	0.0963769	0.027802	0.0412518	0.0415512	0.0353355	0.0415482
	0.0108623	0.0117376	0.0118247	0.0112791	0.164155	0	0.208731	0.193983	0.0641614	0.0574352	0.0585632	0.0571582			0.00573067	0.00648629	0.00661968	0.00721759	0.219521	0.173613	0.145098	0.0592453	0.0557676	0.0561859	0.0475027	0.0561817
	0.011575	0.0124559	0.0125498	0.0119968	0.245436	0	0.250075	0.224146	0.0775752	0.0692329	0.070632	0.0688894			0.00624706	0.00703129	0.00717838	0.00779887	0.253307	0.218658	0.205834	0.113773	0.0723799	0.0729346	0.0614206	0.0729291
	0.0123205	0.0132043	0.0133052	0.0127461	0.338972	1.28234e-38	0.289509	0.252555	0.0907673	0.0808413	0.082506	0.0804326			0.00680004	0.00761171	0.00777349	0.00841583	0.284016	0.265003	0.275128	0.196895	0.0899739	0.090673	0.0761614	0.090666
	0.0130992	0.013983	0.0140913	0.0135274	0.432441	7.75032e-24	0.323862	0.277484	0.102645	0.0913069	0.0932084	0.09084			0.00739115	0.00822882	0.00840631	0.0090696	0.309429	0.309058	0.346511	0.307071	0.106967	0.107805	0.0904087	0.107797
	0.0139114	0.014792	0.0149079	0.0143409	0.5096	1.33467e-12	0.350077	0.297289	0.112106	0.0996668	0.101753	0.0991546			0.00802191	0.00888385	0.00907809	0.00976124	0.32757	0.346842	0.411211	0.431568	0.121525	0.122481	0.102635	0.122471
	0.0147573	0.0156313	0.0157552	0.0151866	0.554717	6.5489e-05	0.365657	0.310583	0.11821	0.105102	0.1073	0.104562			0.00869377	0.00957797	0.00979001	0.0104917	0.336955	0.374564	0.459808	0.546599	0.131882	0.13292	0.111373	0.132909
	0.015637	0.0165009	0.0166331	0.0160646	0.557766	0.915589	0.369055	0.316398	0.120349	0.10708	0.109305	0.106534			0.00940813	0.0103123	0.0105432	0.011262	0.336792	0.389245	0.484455	0.623872	0.136708	0.137781	0.115514	0.13777
	0.0165504	0.0174006	0.0175412	0.0169747	0.51805	3.64731	0.359928	0.314303	0.11835	0.105452	0.107615	0.10492			0.0101663	0.0110877	0.0113386	0.0120728	0.327097	0.389245	0.480944	0.641698	0.1354	0.136455	0.114558	0.136445
	0.0174974	0.0183301	0.0184794	0.0179168	0.444458	0.00413983	0.339192	0.304453	0.112514	0.100479	0.102497	0.0999833			0.0109695	0.0119053	0.0121772	0.012925	0.308685	0.374564	0.449883	0.594804	0.128222	0.129209	0.108723	0.129199
	0.0184778	0.0192889	0.0194472	0.0188904	0.352232	1.33885e-09	0.308874	0.287574	0.103558	0.0927871	0.0945935	0.0923436			0.0118189	0.0127657	0.0130598	0.0138189	0.283059	0.346842	0.396524	0.49685	0.116243	0.117121	0.0988999	0.117112
	0.019491	0.0202765	0.020444	0.0198952	0.257849	1.23373e-19	0.271785	0.264873	0.0924843	0.0832507	0.0847992	0.0828705			0.0127155	0.0136697	0.013987	0.0147552	0.252211	0.309058	0.329309	0.374011	0.101097	0.101838	0.0864487	0.101831
	0.0205365	0.0212922	0.0214691	0.0209304	0.174358	3.23927e-33	0.231087	0.237894	0.0804091	0.0728445	0.0741132	0.072533			0.0136601	0.0146177	0.0149594	0.0157341	0.21836	0.265003	0.257693	0.253718	0.0846352	0.0852286	0.0729099	0.0852228
	0.0216138	0.0223354	0.0225218	0.0219954	0.108907	0	0.189859	0.208347	0.0683935	0.062494	0.0634834	0.0622511			0.0146534	0.0156102	0.0159772	0.0167558	0.183699	0.218658	0.190006	0.155106	0.0685755	0.069024	0.0597135	0.0690195
	0.0227219	0.023405	0.0236011	0.0230893	0.0628362	0	0.150728	0.17793	0.0573043	0.0529557	0.053685	0.0527766			0.015696	0.0166475	0.0170407	0.0178202	0.150164	0.173613	0.132006	0.0854498	0.0542374	0.0545553	0.0479576	0.0545521
	0.0238598	0.0245	0.024706	0.024211	0.033489	0	0.115628	0.148172	0.0477349	0.0447473	0.0452483	0.0446243			0.0167881	0.0177294	0.01815	0.0189272	0.119274	0.132648	0.0864146	0.0424231	0.0424135	0.0426216	0.0383017	0.0426195
	0.0250264	0.0256193	0.0258352	0.0253594	0.0164867	0	0.0857114	0.120322	0.0399877	0.0381325	0.0384436	0.0380561			0.0179301	0.018856	0.0193047	0.0200765	0.0920561	0.0975266	0.0533021	0.0189803	0.0333777	0.0334993	0.0309739	0.0334981
	0.0262204	0.0267616	0.0269874	0.0265332	0.00749731	0	0.0613932	0.095275	0.034108	0.0331506	0.0333111	0.0331112			0.0191217	0.0200269	0.0205045	0.0212673	0.069037	0.0689999	0.0309789	0.00765261	0.0269944	0.0270517	0.0258611	0.0270511
	0.0274404	0.0279254	0.0281613	0.0277309	0.00314931	0	0.0424922	0.073565	0.0299501	0.0296745	0.0297207	0.0296631			0.0203627	0.0212415	0.0217489	0.022499	0.0503078	0.046976	0.0169649	0.00278052	0.0228727	0.0228846	0.022638	0.0228845
	0.0286848	0.0291092	0.029355	0.0289509	0.00122198	0	0.0284187	0.0553888	0.0272548	0.0274775	0.0274402	0.0274867			0.0216526	0.0224991	0.0230369	0.0237706	0.0356215	0.0307756	0.00875391	0.000910436	0.0205164	0.0204975	0.0208916	0.0204976
	0.0299517	0.0303112	0.030567	0.0301916	0.000437978	0	0.0183656	0.0406659	0.0257187	0.0262948	0.0261982	0.0263185			0.0229905	0.0237987	0.0243674	0.0250809	0.0245083	0.0194017	0.00425615	0.000268647	0.0194379	0.0193985	0.0202156	0.0193989
	0.0312393	0.0315298	0.0317954	0.0314509	0.000145004	0	0.0114687	0.0291136	0.0250467	0.0258685	0.0257307	0.0259024			0.0243754	0.0251391	0.0257393	0.0264285	0.0163847	0.01177	0.00194983	7.14367e-05	0.0192243	0.0191716	0.0202665	0.0191721
	0.0325455	0.0327628	0.0330381	0.0327268	4.43451e-05	0	0.00692036	0.0203245	0.024984	0.0259762	0.0258098	0.026017			0.025806	0.0265188	0.0271508	0.0278116	0.0106435	0.00687093	0.000841669	1.71186e-05	0.019563	0.0195013	0.0207838	0.0195019
	0.033868	0.0340082	0.0342931	0.0340172	1.25271e-05	0	0.00403506	0.0138357	0.0253294	0.0264417	0.0262552	0.0264875			0.0272807	0.0279362	0.0286001	0.0292285	0.00671829	0.00385973	0.000342334	3.6968e-06	0.0202374	0.0201691	0.0215869	0.0201698
	0.0352045	0.0352639	0.035558	0.0353198	3.26885e-06	0	0.00227341	0.0091842	0.0259351	0.0271359	0.0269345	0.0271854			0.0287974	0.0293893	0.0300853	0.0306769	0.00412055	0.00208642	0.000131197	7.19432e-07	0.0211085	0.021035	0.0225597	0.0210358
	0.0365524	0.0365275	0.0368307	0.0366321	7.87912e-07	0	0.00123769	0.00594482	0.0266992	0.0279697	0.0277566	0.028022			0.0303541	0.0308758	0.0316038	0.0321546	0.0024557	0.0010853	4.73763e-05	1.26172e-07	0.022093	0.0220151	0.0236326	0.0220159
	0.0379091	0.0377966	0.0381085	0.0379515	1.75428e-07	0	0.000651107	0.00375227	0.0275555	0.0288848	0.0286618	0.0289395			0.0319481	0.0323934	0.0331532	0.0336589	0.00142206	0.00054325	1.61199e-05	1.99408e-08	0.023144	0.0230619	0.0247661	0.0230627
	0.0392718	0.0390687	0.0393889	0.0392755	3.60795e-08	0	0.000330978	0.00230944	0.0284627	0.0298448	0.029613	0.0299017			0.0335768	0.0339393	0.0347304	0.035187	0.000800179	0.000261669	5.16809e-06	2.84008e-09	0.0242357	0.0241495	0.0259383	0.0241504
	0.0406376	0.0403411	0.0406693	0.040601	6.85426e-09	0	0.000162575	0.00138605	0.0293961	0.0308279	0.0305877	0.0308868			0.0352369	0.0355105	0.0363325	0.0367359	0.000437501	0.000121285	1.56121e-06	3.64525e-10	0.0253546	0.0252644	0.0271374	0.0252652
	0.0420034	0.0416111	0.0419468	0.0419254	1.20282e-09	0	7.71638e-05	0.000811161	0.030341	0.0318208	0.0315727	0.0318818			0.036925	0.0371039	0.037956	0.0383023	0.000232431	5.40962e-05	4.44382e-07	4.2163e-11	0.0264929	0.0263986	0.0283564	0.0263995
	0.043366	0.0428761	0.0432187	0.0432455	1.94975e-10	0	3.539e-05	0.000462907	0.0312888	0.0328158	0.0325597	0.0328786			0.0386374	0.0387161	0.0395972	0.0398827	0.000119987	2.32182e-05	1.19184e-07	4.39485e-12	0.0276459	0.0275475	0.0295907	0.0275484
	0.0447224	0.044133	0.0444821	0.0445584	2.91941e-11	0	1.56839e-05	0.000257595	0.032234	0.0338075	0.0335436	0.0338723			0.0403702	0.0403432	0.0412524	0.0414735	6.01863e-05	9.58942e-06	3.01191e-08	4.12824e-13	0.0288098	0.0287073	0.0308366	0.0287083
	0.0460691	0.045379	0.0457339	0.0458608	4.03786e-12	0	6.71634e-06	0.000139779	0.0331728	0.0347923	0.0345207	0.034859			0.0421191	0.0419816	0.0429174	0.0430707	2.93349e-05	3.81118e-06	7.17185e-09	3.49457e-14	0.0299816	0.0298748	0.0320908	0.0298759
	0.0474028	0.0466111	0.0469712	0.0471496	5.15878e-13	0	2.7792e-06	7.39606e-05	0.0341022	0.0357671	0.0354879	0.0358356			0.0438795	0.0436269	0.044588	0.0446703	1.3893e-05	1.45757e-06	1.60911e-09	2.66582e-15	0.031158	0.031047	0.0333499	0.0310481
	0.0487201	0.0478264	0.048191	0.0484215	6.08809e-14	0	1.11125e-06	3.81609e-05	0.0350195	0.0367292	0.0364425	0.0367996			0.0456467	0.0452751	0.0462596	0.0462681	6.39338e-06	5.36416e-07	3.40176e-10	1.83263e-16	0.0323358	0.0322207	0.0346106	0.0322218
	0.0500175	0.0490217	0.0493901	0.0496733	6.63674e-15	0	4.29349e-07	1.91997e-05	0.0359222	0.037676	0.0373819	0.0377482			0.0474157	0.0469215	0.0479276	0.0478598	2.85884e-06	1.89966e-07	6.7762e-11	1.13535e-17	0.0335118	0.0333925	0.0358694	0.0333937
	0.0512915	0.0501941	0.0505654	0.0509017	6.68293e-16	0	1.60294e-07	9.4195e-06	0.036808	0.038605	0.0383036	0.038679			0.0491812	0.0485616	0.0495871	0.0494407	1.24214e-06	6.47373e-08	1.27184e-11	6.33854e-19	0.0346827	0.0345592	0.0371226	0.0345604
	0.0525385	0.0513405	0.051714	0.0521033	6.2161e-17	0	5.78267e-08	4.50629e-06	0.0376743	0.0395136	0.0392052	0.0395894			0.050938	0.0501906	0.0512333	0.0510064	5.24419e-07	2.12293e-08	2.24929e-12	3.18903e-20	0.0358448	0.0357172	0.0383665	0.0357185
	0.0537551	0.0524578	0.0528327	0.0532748	5.34083e-18	0	2.0158e-08	2.10217e-06	0.0385189	0.0403994	0.040084	0.0404769			0.0526804	0.0518036	0.052861	0.0525522	2.15134e-07	6.69914e-09	3.74819e-13	1.44589e-21	0.0369948	0.0368631	0.0395974	0.0368644
	0.0549379	0.0535431	0.0539185	0.054413	4.23875e-19	0	6.79004e-09	9.5626e-07	0.0393393	0.0412599	0.0409378	0.041339			0.0544028	0.0533956	0.0544652	0.0540732	8.57557e-08	2.03426e-09	5.88522e-14	5.90773e-23	0.0381289	0.0379932	0.0408113	0.0379945
	0.0560832	0.0545934	0.0549684	0.0555147	3.10747e-20	0	2.21006e-09	4.24171e-07	0.0401332	0.0420926	0.041764	0.0421733			0.0560994	0.0549616	0.0560405	0.0555647	3.32155e-08	5.94422e-10	8.70699e-15	2.17527e-24	0.0392436	0.0391038	0.0420043	0.0391052
	0.0571879	0.0556058	0.0559794	0.0565767	2.10433e-21	0	6.95092e-10	1.83469e-07	0.0408985	0.0428952	0.0425603	0.0429774			0.0577644	0.0564966	0.0575817	0.057022	1.2501e-08	1.67142e-10	1.21377e-15	7.21797e-26	0.040335	0.0401914	0.0431725	0.0401928
	0.0582484	0.0565774	0.0569487	0.0575958	1.31632e-22	0	2.11245e-10	7.73828e-08	0.0416327	0.0436652	0.0433244	0.0437489			0.0593919	0.0579953	0.0590836	0.0584401	4.57161e-09	4.52253e-11	1.59431e-16	2.15836e-27	0.0413995	0.0412521	0.044312	0.0412536
	0.0592617	0.0575055	0.0578735	0.0585691	7.60581e-24	0	6.20352e-11	3.1826e-08	0.0423337	0.0444005	0.0440539	0.0444856			0.060976	0.0594528	0.060541	0.0598143	1.6245e-09	1.17755e-11	1.9732e-17	5.81623e-29	0.0424335	0.0422824	0.0454186	0.0422839
	0.0602246	0.0583873	0.058751	0.0594936	4.05948e-25	0	1.76034e-11	1.27638e-08	0.0429995	0.0450988	0.0447467	0.0451852			0.0625109	0.0608639	0.0619486	0.06114	5.60909e-10	2.95039e-12	2.3011e-18	1.41243e-30	0.0434332	0.0432785	0.0464887	0.04328
	0.061134	0.0592203	0.0595788	0.0603665	2.0014e-26	0	4.8268e-12	4.99152e-09	0.0436279	0.0457579	0.0454007	0.0458456			0.0639907	0.0622236	0.0633014	0.0624124	1.88187e-10	7.11349e-13	2.5285e-19	3.09101e-32	0.044395	0.0442369	0.0475182	0.0442385
	0.0619871	0.0600021	0.0603543	0.0611852	9.11457e-28	0	1.27888e-12	1.90347e-09	0.0442172	0.0463759	0.0460139	0.0464648			0.0654099	0.0635271	0.0645945	0.0636272	6.13494e-11	1.6504e-13	2.61792e-20	6.09596e-34	0.0453155	0.0451542	0.0485034	0.0451558
	0.0627812	0.0607303	0.0610752	0.061947	3.83423e-29	0	3.27422e-13	7.07807e-10	0.0447654	0.0469509	0.0465844	0.0470409			0.0667629	0.0647696	0.0658229	0.0647799	1.94337e-11	3.68466e-14	2.55395e-21	1.08341e-35	0.0461912	0.0460267	0.0494407	0.0460284
	0.0635137	0.0614026	0.0617393	0.0626496	1.4899e-30	0	8.10011e-14	2.56651e-10	0.0452708	0.047481	0.0471103	0.047572			0.0680442	0.0659465	0.0669821	0.0658663	5.9817e-12	7.91606e-15	2.34765e-22	1.7352e-37	0.0470188	0.0468514	0.0503266	0.0468531
	0.0641822	0.0620172	0.0623446	0.0632908	5.34783e-32	0	1.93634e-14	9.07461e-11	0.0457318	0.0479646	0.0475901	0.0480565			0.0692488	0.0670534	0.0680675	0.0668824	1.78903e-12	1.63653e-15	2.03339e-23	2.50447e-39	0.0477951	0.047625	0.0511575	0.0476266
	0.0647846	0.062572	0.0628892	0.0638686	1.77311e-33	0	4.47278e-15	3.12875e-11	0.0461471	0.0484001	0.0480222	0.0484928			0.0703718	0.0680861	0.069075	0.0678244	5.19917e-13	3.25567e-16	1.65948e-24	3.2576e-41	0.0485172	0.0483444	0.0519304	0.0483462
	0.0653188	0.0630654	0.0633715	0.064381	5.43043e-35	0	9.98346e-16	1.0519e-11	0.0465152	0.0487861	0.0484052	0.0488796			0.0714084	0.0690405	0.0700006	0.0686889	1.46816e-13	6.23247e-17	1.2761e-25	3.81153e-43	0.0491821	0.049007	0.0526421	0.0490088
	0.0657831	0.0634959	0.0637898	0.0648265	1.53628e-36	0	2.15323e-16	3.44851e-12	0.0468349	0.0491214	0.048738	0.0492156			0.0723545	0.0699129	0.0708407	0.0694724	4.02846e-14	1.14811e-17	9.24625e-27	4.2039e-45	0.0497873	0.0496101	0.0532899	0.0496118
	0.0661759	0.0638621	0.064143	0.0652036	4.01464e-38	0	4.48752e-17	1.10242e-12	0.0471052	0.049405	0.0490193	0.0494997			0.0732059	0.0707	0.0715918	0.070172	1.07406e-14	2.03521e-18	6.31262e-28	0	0.0503304	0.0501512	0.0538711	0.050153
	0.0664959	0.0641629	0.0644299	0.065511	9.69083e-40	0	9.03711e-18	3.43655e-13	0.0473253	0.0496358	0.0492483	0.049731			0.0739591	0.0713986	0.072251	0.070785	2.78253e-15	3.47166e-19	4.06086e-29	0	0.0508091	0.0506282	0.0543835	0.05063
	0.066742	0.0643973	0.0646496	0.0657478	2.1608e-41	0	1.75857e-18	1.04461e-13	0.0474945	0.0498132	0.0494243	0.0499087			0.0746109	0.072006	0.0728155	0.071309	7.00447e-16	5.69859e-20	2.46145e-30	0	0.0512215	0.0510392	0.054825	0.051041
	0.0669135	0.0645646	0.0648015	0.0659132	4.45613e-43	0	3.3067e-19	3.09632e-14	0.0476121	0.0499366	0.0495467	0.0500323			0.0751585	0.0725196	0.0732831	0.0717419	1.71331e-16	9.00122e-21	1.40582e-31	0	0.051566	0.0513824	0.0551937	0.0513842
	0.0670097	0.0646643	0.0648849	0.0660066	8.40779e-45	0	6.00809e-20	8.94941e-15	0.0476777	0.0500055	0.0496151	0.0501013			0.0755994	0.0729375	0.0736519	0.0720821	4.0721e-17	1.36816e-21	7.5654e-33	0	0.0518411	0.0516565	0.0554881	0.0516583
	0.0670302	0.0646961	0.0648997	0.0660278	0	0	1.05484e-20	2.52232e-15	0.0476913	0.0500197	0.0496292	0.0501156			0.0759318	0.0732579	0.0739203	0.0723282	9.4043e-18	2.00114e-22	3.83617e-34	0	0.0520457	0.0518604	0.0557071	0.0518622
	0.0669751	0.0646598	0.0648459	0.0659767	0	0	1.78953e-21	6.93209e-16	0.0476527	0.0499792	0.049589	0.050075			0.0761542	0.0734795	0.0740872	0.0724793	2.11037e-18	2.81656e-23	1.83286e-35	0	0.0521789	0.0519931	0.0558497	0.051995
	0.0668445	0.0645556	0.0647235	0.0658534	0	0	2.93361e-22	1.85774e-16	0.0475621	0.0498841	0.0494947	0.0499797			0.0762657	0.0736015	0.0741519	0.0725347	4.60164e-19	3.81474e-24	8.25136e-37	0	0.0522402	0.0520542	0.0559153	0.0520561
	0.0666389	0.0643838	0.064533	0.0656583	0	0	4.64697e-23	4.85473e-17	0.0474197	0.0497348	0.0493465	0.0498301			0.0762657	0.0736233	0.0741143	0.0724942	9.74972e-20	4.97179e-25	3.50014e-38	0	0.0522294	0.0520434	0.0559037	0.0520453
	0.0663589	0.064145	0.0642749	0.0653922	0	0	7.11286e-24	1.23709e-17	0.047226	0.0495317	0.049145	0.0496266			0.0761542	0.0735448	0.0739743	0.072358	2.00722e-20	6.23538e-26	1.39898e-39	0	0.0521465	0.0519608	0.055815	0.0519626
	0.0660055	0.0638398	0.0639502	0.0650558	0	0	1.05202e-24	3.07396e-18	0.0469817	0.0492754	0.0488907	0.0493699			0.0759318	0.0733664	0.0737326	0.0721266	4.01534e-21	7.52517e-27	5.2686e-41	0	0.0519918	0.0518066	0.0556494	0.0518085
	0.06558	0.0634693	0.0635598	0.0646502	0	0	1.50353e-25	7.44819e-19	0.0466875	0.0489669	0.0485846	0.0490607			0.0755994	0.0730887	0.0733902	0.0718009	7.80499e-22	8.73922e-28	1.86933e-42	0	0.0517659	0.0515816	0.0554076	0.0515834
	0.0650836	0.0630346	0.0631049	0.0641768	0	0	2.07638e-26	1.75979e-19	0.0463444	0.0486071	0.0482276	0.0487002			0.0751585	0.072713	0.0729486	0.0713822	1.47417e-22	9.76633e-29	6.30584e-44	0	0.0514699	0.0512866	0.0550908	0.0512884
	0.064518	0.062537	0.062587	0.0636371	0	0	2.77082e-27	4.05444e-20	0.0459536	0.0481971	0.0478209	0.0482895			0.0746109	0.0722407	0.0724094	0.0708722	2.70549e-23	1.05025e-29	1.4013e-45	0	0.0511049	0.0509229	0.0547001	0.0509247
	0.0638852	0.0619782	0.0620076	0.0630328	0	0	3.57285e-28	9.10872e-21	0.0455162	0.0477384	0.0473657	0.0478299			0.0739591	0.0716738	0.071775	0.0702729	4.82467e-24	1.08682e-30	0	0	0.0506724	0.0504919	0.0542372	0.0504937
	0.0631872	0.0613597	0.0613686	0.0623659	0	0	4.45173e-29	1.99545e-21	0.0450336	0.0472323	0.0468635	0.0473228			0.0732059	0.0710145	0.0710479	0.0695866	8.36014e-25	1.08224e-31	0	0	0.0501741	0.0499955	0.0537039	0.0499973
	0.0624263	0.0606836	0.060672	0.0616385	0	0	5.3598e-30	4.26269e-22	0.0445075	0.0466804	0.046316	0.0467699			0.0723545	0.0702654	0.070231	0.0688159	1.40761e-25	1.03704e-32	0	0	0.0496122	0.0494356	0.0531024	0.0494373
	0.0616049	0.0599518	0.0599197	0.0608529	0	0	6.23556e-31	8.8794e-23	0.0439394	0.0460846	0.0457248	0.0461729			0.0714084	0.0694297	0.0693276	0.0679638	2.30291e-26	9.56242e-34	0	0	0.0489888	0.0488144	0.0524352	0.0488161
	0.0607258	0.0591666	0.0591142	0.0600114	0	0	7.00985e-32	1.80361e-23	0.0433311	0.0454465	0.0450918	0.0455337			0.0703718	0.0685104	0.0683414	0.0670336	3.66096e-27	8.48484e-35	0	0	0.0483064	0.0481344	0.0517048	0.0481362
	0.0597916	0.0583302	0.0582578	0.0591168	0	0	7.61462e-33	3.57238e-24	0.0426844	0.0447684	0.0444189	0.0448542			0.0692488	0.0675113	0.0672761	0.0660287	5.65506e-28	7.24473e-36	0	0	0.0475678	0.0473984	0.0509142	0.0474001
	0.0588053	0.0574452	0.057353	0.0581717	0	0	7.99271e-34	6.89971e-25	0.0420015	0.0440521	0.0437082	0.0441365			0.0680442	0.0664361	0.066136	0.064953	8.48794e-29	5.95255e-37	0	0	0.0467758	0.0466092	0.0500664	0.0466109
	0.0577701	0.0565142	0.0564026	0.0571791	0	0	8.10675e-35	1.29946e-25	0.0412842	0.0432998	0.0429618	0.0433828			0.0667629	0.0652891	0.0649254	0.0638103	1.23792e-29	4.70638e-38	0	0	0.0459334	0.0457699	0.0491648	0.0457715
	0.056689	0.0555398	0.0554092	0.0561419	0	0	7.94522e-36	2.38645e-26	0.0405349	0.0425139	0.042182	0.0425953			0.0654099	0.0640745	0.063649	0.0626049	1.7543e-30	3.58075e-39	0	0	0.0450439	0.0448835	0.0482127	0.0448851
	0.0555653	0.0545248	0.0543757	0.0550631	0	0	7.5244e-37	4.27365e-27	0.0397556	0.0416965	0.041371	0.0417765			0.0639907	0.0627969	0.0623115	0.0613411	2.41569e-31	2.62158e-40	0	0	0.0441106	0.0439536	0.0472138	0.0439551
	0.0544025	0.0534721	0.0533051	0.0539458	0	0	6.88563e-38	7.46283e-28	0.0389486	0.0408502	0.0405313	0.0409285			0.0625109	0.061461	0.0609178	0.0600234	3.23223e-32	1.84691e-41	0	0	0.0431371	0.0429835	0.0461717	0.042985
	0.0532038	0.0523845	0.0522002	0.0527934	0	0	6.08867e-39	1.27077e-28	0.0381163	0.0399773	0.0396652	0.0400539			0.060976	0.0600716	0.0594731	0.0586564	4.2023e-33	1.25276e-42	0	0	0.0421267	0.0419767	0.0450903	0.0419782
	0.0519729	0.0512652	0.0510641	0.051609	0	0	5.20245e-40	2.11002e-29	0.037261	0.0390802	0.0387751	0.0391551			0.0593919	0.0586337	0.0579825	0.0572448	5.30879e-34	8.12753e-44	0	0	0.0410832	0.0409369	0.0439734	0.0409384
	0.0507131	0.0501169	0.0498999	0.0503959	0	0	4.2954e-41	3.41637e-30	0.0363851	0.0381615	0.0378635	0.0382346			0.0577644	0.0571523	0.0564511	0.0557934	6.51671e-35	5.60519e-45	0	0	0.0400102	0.0398678	0.0428249	0.0398692
	0.0494281	0.048943	0.0487107	0.0491575	0	0	3.42617e-42	5.39389e-31	0.0354909	0.0372236	0.036933	0.0372949			0.0560994	0.0556324	0.0548843	0.0543068	7.77292e-36	0	0	0	0.0389114	0.0387729	0.0416488	0.0387743
	0.0481212	0.0477462	0.0474995	0.047897	0	0	2.64845e-43	8.30416e-32	0.0345807	0.036269	0.0359859	0.0363386			0.0544028	0.0540793	0.0532873	0.0527901	9.00875e-37	0	0	0	0.0377906	0.037656	0.0404491	0.0376574
	0.0467959	0.0465297	0.0462694	0.0466176	0	0	1.96182e-44	1.24666e-32	0.0336571	0.0353003	0.0350248	0.035368			0.0526804	0.0524979	0.0516653	0.0512478	1.01454e-37	0	0	0	0.0366513	0.0365208	0.0392297	0.0365221
	0.0454559	0.0452966	0.0450234	0.0453228	0	0	1.4013e-45	1.82498e-33	0.0327224	0.0343199	0.034052	0.0343857			0.050938	0.0508934	0.0500235	0.0496849	1.11019e-38	0	0	0	0.0354973	0.0353709	0.0379945	0.0353722
	0.0441043	0.0440498	0.0437647	0.0440157	0	0	0	2.6051e-34	0.0317787	0.0333302	0.03307	0.0333941			0.0491812	0.0492707	0.048367	0.048106	1.18045e-39	0	0	0	0.0343322	0.0342099	0.0367474	0.0342111
	0.0427447	0.0427922	0.0424961	0.0426994	0	0	0	3.62619e-35	0.0308286	0.0323337	0.0320813	0.0323957			0.0474157	0.0476349	0.0467007	0.0465158	1.21962e-40	0	0	0	0.0331594	0.0330413	0.0354922	0.0330425
	0.0413802	0.0415269	0.0412206	0.0413772	0	0	0	4.92191e-36	0.0298741	0.0313327	0.031088	0.0313927			0.0456467	0.0459906	0.0450296	0.0449186	1.22445e-41	0	0	0	0.0319825	0.0318686	0.0342324	0.0318697
	0.040014	0.0402566	0.0399411	0.040052	0	0	0	6.51441e-37	0.0289176	0.0303294	0.0300926	0.0303875			0.0438795	0.0443427	0.0433583	0.043319	1.19391e-42	0	0	0	0.0308047	0.030695	0.0329718	0.0306961
	0.0386493	0.0389841	0.0386604	0.0387267	0	0	0	8.40764e-38	0.027961	0.0293261	0.0290972	0.0293824			0.0421191	0.0426955	0.0416914	0.0417212	1.13505e-43	0	0	0	0.0296294	0.0295239	0.0317138	0.0295249
	0.037289	0.0377121	0.0373811	0.0374044	0	0	0	1.05811e-38	0.0270066	0.0283251	0.0281039	0.0283794			0.0403702	0.0410536	0.0400332	0.0401291	9.80909e-45	0	0	0	0.0284595	0.0283582	0.0304616	0.0283592
	0.035936	0.0364433	0.036106	0.0360876	0	0	0	1.29851e-39	0.0260561	0.0273283	0.0271149	0.0273806			0.0386374	0.0394211	0.0383879	0.0385469	1.4013e-45	0	0	0	0.0272981	0.0272009	0.0292185	0.0272018
	0.0345929	0.0351802	0.0348374	0.034779	0	0	0	1.55389e-40	0.0251117	0.0263377	0.0261321	0.0263882			0.036925	0.037802	0.0367594	0.0369781	0	0	0	0	0.0261479	0.0260548	0.0279874	0.0260557
	0.0332625	0.0339251	0.0335778	0.0334812	0	0	0	1.81314e-41	0.024175	0.0253552	0.0251573	0.0254038			0.0352369	0.0362	0.0351513	0.0354262	0	0	0	0	0.0250115	0.0249225	0.0267711	0.0249234
	0.0319472	0.0326804	0.0323296	0.0321965	0	0	0	2.06271e-42	0.0232478	0.0243828	0.0241924	0.0244295			0.0335768	0.0346188	0.0335672	0.0338947	0	0	0	0	0.0238916	0.0238065	0.0255723	0.0238073
	0.0306492	0.0314483	0.0310948	0.0309271	0	0	0	2.28412e-43	0.0223317	0.0234219	0.0232391	0.0234668			0.0319481	0.0330615	0.0320102	0.0323864	0	0	0	0	0.0227902	0.0227091	0.0243935	0.0227099
	0.0293708	0.0302308	0.0298755	0.0296753	0	0	0	2.52234e-44	0.0214282	0.0224744	0.0222989	0.0225174			0.0303541	0.0315312	0.0304832	0.0309045	0	0	0	0	0.0217096	0.0216323	0.0232369	0.0216331
	0.0281139	0.0290299	0.0286736	0.028443	0	0	0	2.8026e-45	0.0205388	0.0215415	0.0213734	0.0215828			0.0287974	0.0300309	0.028989	0.0294513	0	0	0	0	0.0206517	0.0205782	0.0221045	0.0205789
	0.0268805	0.0278474	0.027491	0.027232	0	0	0	0	0.0196648	0.0206249	0.0204638	0.0206644			0.0272807	0.028563	0.02753	0.0280294	0	0	0	0	0.0196182	0.0195484	0.0209983	0.019549
	0.0256721	0.026685	0.0263293	0.026044	0	0	0	0	0.0188074	0.0197256	0.0195716	0.0197634			0.025806	0.0271299	0.0261083	0.0266409	0	0	0	0	0.0186107	0.0185444	0.0199199	0.0185451
	0.0244904	0.0255442	0.02519	0.0248806	0	0	0	0	0.0179677	0.0188449	0.0186978	0.018881			0.0243754	0.0257336	0.0247258	0.0252877	0	0	0	0	0.0176305	0.0175678	0.0188708	0.0175684
	0.0233368	0.0244265	0.0240744	0.0237431	0	0	0	0	0.0171467	0.0179838	0.0178434	0.0180183			0.0229905	0.0243759	0.0233842	0.0239716	0	0	0	0	0.0166789	0.0166196	0.0178523	0.0166201
	0.0222123	0.0233331	0.022984	0.0226328	0	0	0	0	0.0163453	0.0171433	0.0170095	0.0171762			0.0216526	0.0230584	0.0220849	0.0226939	0	0	0	0	0.0157569	0.0157008	0.0168654	0.0157014
	0.0211182	0.0222652	0.0219197	0.0215507	0	0	0	0	0.0155644	0.0163243	0.0161968	0.0163555			0.0203627	0.0217824	0.0208289	0.0214559	0	0	0	0	0.0148653	0.0148124	0.0159111	0.0148129
	0.0200554	0.0212239	0.0208826	0.020498	0	0	0	0	0.0148045	0.0155273	0.0154061	0.0155571			0.0191217	0.0205491	0.0196173	0.0202586	0	0	0	0	0.0140048	0.0139549	0.01499	0.0139554
	0.0190245	0.02021	0.0198735	0.0194753	0	0	0	0	0.0140664	0.0147531	0.0146379	0.0147814			0.0179301	0.0193591	0.0184506	0.0191029	0	0	0	0	0.0131758	0.0131289	0.0141028	0.0131294
	0.0180262	0.0192243	0.0188931	0.0184834	0	0	0	0	0.0133504	0.0140022	0.0138929	0.014029			0.0167881	0.0182133	0.0173293	0.0179893	0	0	0	0	0.0123788	0.0123348	0.0132497	0.0123352
	0.0170611	0.0182674	0.0179421	0.0175228	0	0	0	0	0.012657	0.013275	0.0131713	0.0133004			0.015696	0.0171119	0.0162537	0.0169183	0	0	0	0	0.011614	0.0115727	0.012431	0.0115731
	0.0161294	0.0173399	0.0170209	0.0165939	0	0	0	0	0.0119865	0.0125717	0.0124736	0.0125958			0.0146534	0.0160552	0.0152238	0.0158899	0	0	0	0	0.0108814	0.0108426	0.0116469	0.010843
	0.0152313	0.0164422	0.01613	0.015697	0	0	0	0	0.0113391	0.0118927	0.0117999	0.0119155			0.0136601	0.0150433	0.0142395	0.0149044	0	0	0	0	0.0101809	0.0101446	0.0108971	0.010145
	0.0143671	0.0155746	0.0152695	0.0148324	0	0	0	0	0.010715	0.0112381	0.0111504	0.0112596			0.0127155	0.014076	0.0133004	0.0139615	0	0	0	0	0.00951232	0.00947845	0.0101815	0.00947878
	0.0135365	0.0147373	0.0144396	0.014	0	0	0	0	0.0101141	0.0106079	0.0105251	0.0106282			0.0118189	0.0131529	0.0124061	0.013061	0	0	0	0	0.00887539	0.00884379	0.00949977	0.0088441
	0.0127396	0.0139303	0.0136404	0.0131999	0	0	0	0	0.00953648	0.0100021	0.00992399	0.0100212			0.0109695	0.0122737	0.0115559	0.0122024	0	0	0	0	0.00826967	0.00824023	0.00885144	0.00824052
	0.0119761	0.0131536	0.0128718	0.0124319	0	0	0	0	0.00898202	0.00942054	0.00934699	0.00943859			0.0101663	0.0114376	0.0107492	0.0113852	0	0	0	0	0.00769465	0.00766726	0.00823597	0.00766753
	0.0112456	0.0124072	0.0121336	0.0116957	0	0	0	0	0.00845054	0.00886311	0.00879392	0.00888009			0.00940813	0.0106439	0.00998491	0.0106087	0	0	0	0	0.00714973	0.00712427	0.00765271	0.00712452
	0.0105478	0.0116909	0.0114257	0.0109911	0	0	0	0	0.00794181	0.00832954	0.00826452	0.00834551			0.00869377	0.00989188	0.00926219	0.00987208	0	0	0	0	0.00663422	0.0066106	0.00710094	0.00661083
	0.0098821	0.0110043	0.0107477	0.0103176	0	0	0	0	0.00745555	0.00781954	0.00775849	0.00783453			0.00802191	0.00918045	0.00857992	0.00917447	0	0	0	0	0.00614738	0.00612549	0.00657985	0.00612571
	0.00924797	0.0103472	0.0100992	0.00967478	0	0	0	0	0.0069914	0.00733273	0.00727549	0.00734679			0.00739115	0.00850858	0.00793693	0.00851489	0	0	0	0	0.0056884	0.00566815	0.00608858	0.00566835
	0.00864476	0.00971905	0.00947978	0.00906207	0	0	0	0	0.00654898	0.00686871	0.00681509	0.00688188			0.00680004	0.00787515	0.00733198	0.00789229	0	0	0	0	0.00525642	0.0052377	0.00562621	0.00523789
	0.00807177	0.00911945	0.00888897	0.00847887	0	0	0	0	0.00612785	0.00642702	0.00637685	0.00643934			0.00624706	0.00727895	0.00676379	0.00730554	0	0	0	0	0.00485054	0.00483327	0.00519177	0.00483344
	0.00752826	0.00854785	0.00832615	0.00792452	0	0	0	0	0.00572752	0.00600715	0.00596026	0.00601867			0.00573067	0.00671872	0.00623102	0.00675348	0	0	0	0	0.00446981	0.0044539	0.00478426	0.00445405
	0.00701342	0.00800365	0.00779072	0.00739829	0	0	0	0	0.0053475	0.00560857	0.00556479	0.00561932			0.00524927	0.00619317	0.00573228	0.00623489	0	0	0	0	0.00411328	0.00409864	0.00440265	0.00409878
	0.00652641	0.00748622	0.007282	0.00689945	0	0	0	0	0.00498723	0.00523071	0.00518988	0.00524074			0.00480129	0.00570096	0.00526618	0.00574851	0	0	0	0	0.00377996	0.00376651	0.00404588	0.00376664
	0.00606637	0.00699487	0.0067993	0.0064272	0	0	0	0	0.00464614	0.00487298	0.00483493	0.00488232			0.00438513	0.00524072	0.0048313	0.00529307	0	0	0	0	0.00346886	0.00345651	0.00371289	0.00345663
	0.00563239	0.00652891	0.00634188	0.00598071	0	0	0	0	0.00432365	0.00453474	0.00449934	0.00454343			0.00399918	0.00481108	0.00442621	0.00486728	0	0	0	0	0.00317896	0.00316764	0.0034026	0.00316776
	0.00522355	0.00608757	0.00590898	0.00555915	0	0	0	0	0.00401914	0.00421537	0.00418246	0.00422344			0.00364187	0.00441065	0.00404949	0.00446982	0	0	0	0	0.00290927	0.00289891	0.00311394	0.00289901
	0.00483893	0.00567011	0.0054998	0.00516164	0	0	0	0	0.003732	0.0039142	0.00388364	0.0039217			0.00331164	0.00403804	0.00369971	0.0040994	0	0	0	0	0.00265878	0.00264931	0.00284582	0.00264941
	0.00447756	0.00527571	0.00511353	0.00478731	0	0	0	0	0.00346157	0.00363057	0.00360223	0.00363753			0.00300695	0.00369187	0.00337548	0.0037547	0	0	0	0	0.0024265	0.00241786	0.00259721	0.00241795
	0.00413851	0.00490359	0.00474937	0.00443526	0	0	0	0	0.00320723	0.00336382	0.00333756	0.00337026			0.00272631	0.00337079	0.0030754	0.00343444	0	0	0	0	0.00221146	0.00220358	0.00236703	0.00220366
	0.00382081	0.00455293	0.00440647	0.0041046	0	0	0	0	0.00296833	0.00311325	0.00308895	0.00311922			0.00246825	0.00307343	0.00279814	0.00313735	0	0	0	0	0.00201269	0.00200552	0.00215428	0.00200559
	0.00352352	0.0042229	0.004084	0.00379443	0	0	0	0	0.00274422	0.0028782	0.00285573	0.00288372			0.00223134	0.0027985	0.00254236	0.00286217	0	0	0	0	0.00182926	0.00182274	0.00195794	0.00182281
	0.00324569	0.00391267	0.00378113	0.00350386	0	0	0	0	0.00253426	0.00265798	0.00263723	0.00266308			0.00201423	0.00254469	0.00230676	0.00260768	0	0	0	0	0.00166024	0.00165433	0.00177704	0.00165439
	0.0029864	0.00362142	0.00349701	0.003232	0	0	0	0	0.0023378	0.00245193	0.00243279	0.00245663			0.00181559	0.00231075	0.00209011	0.00237267	0	0	0	0	0.00150477	0.00149941	0.00161063	0.00149946
	0.00274472	0.00334833	0.00323082	0.00297796	0	0	0	0	0.00215421	0.00225938	0.00224174	0.00226371			0.00163415	0.00209546	0.00189119	0.00215599	0	0	0	0	0.00136197	0.00135712	0.00145778	0.00135717
	0.00251975	0.00309257	0.00298173	0.00274089	0	0	0	0	0.00198287	0.00207967	0.00206344	0.00208366			0.00146868	0.00189764	0.00170884	0.00195651	0	0	0	0	0.00123102	0.00122663	0.00131762	0.00122668
	0.00231061	0.00285335	0.00274894	0.00251993	0	0	0	0	0.00182316	0.00191217	0.00189724	0.00191583			0.00131805	0.00171615	0.00154194	0.00177315	0	0	0	0	0.00111112	0.00110716	0.00118929	0.0011072
	0.00211643	0.00262986	0.00253164	0.00231424	0	0	0	0	0.00167448	0.00175623	0.00174252	0.00175959			0.00118113	0.00154991	0.00138942	0.00160484	0	0	0	0	0.00100151	0.000997948	0.00107197	0.000997983
	0.00193639	0.00242133	0.00232905	0.00212302	0	0	0	0	0.00153624	0.00161124	0.00159866	0.00161433			0.00105689	0.00139787	0.00125026	0.00145059	0	0	0	0	0.000901475	0.000898265	0.000964893	0.000898297
	0.00176966	0.002227	0.0021404	0.00194546	0	0	0	0	0.00140788	0.00147661	0.00146508	0.00147944			0.000944341	0.00125902	0.00112348	0.00130943	0	0	0	0	0.000810307	0.000807422	0.000867312	0.000807451
	0.00161546	0.0020461	0.00196496	0.0017808	0	0	0	0	0.00128882	0.00135175	0.00134119	0.00135434			0.000842541	0.00113242	0.00100816	0.00118045	0	0	0	0	0.000727354	0.000724764	0.000778523	0.00072479
	0.00147304	0.00187792	0.00180198	0.00162829	0	0	0	0	0.00117855	0.00123609	0.00122644	0.00123846			0.000750617	0.00101717	0.000903433	0.00106276	0	0	0	0	0.000651991	0.00064967	0.000697859	0.000649693
	0.00134165	0.00172176	0.00165077	0.00148722	0	0	0	0	0.00107653	0.00112909	0.00112028	0.00113125			0.000667745	0.000912401	0.000808464	0.000955546	0	0	0	0	0.00058363	0.000581552	0.000624688	0.000581573
	0.00122061	0.00157692	0.00151066	0.00135687	0	0	0	0	0.00098227	0.00103023	0.00102218	0.0010322			0.000593154	0.00081731	0.00072248	0.000858011	0	0	0	0	0.000521715	0.000519857	0.000558417	0.000519876
	0.00110923	0.00144275	0.00138097	0.0012366	0	0	0	0	0.000895282	0.000938991	0.00093166	0.00094079			0.000526126	0.000731132	0.000644748	0.000769414	0	0	0	0	0.000465724	0.000464066	0.000498488	0.000464082
	0.00100688	0.0013186	0.00126108	0.00112575	0	0	0	0	0.000815104	0.000854899	0.000848225	0.000856537			0.00046599	0.00065315	0.000574585	0.000689053	0	0	0	0	0.000415168	0.00041369	0.000444375	0.000413704
	0.000912938	0.00120387	0.00115038	0.00102372	0	0	0	0	0.000741295	0.000777487	0.000771417	0.000778977			0.000412124	0.000582692	0.000511351	0.00061627	0	0	0	0	0.000369589	0.000368273	0.000395589	0.000368286
	0.000826828	0.00109797	0.00104828	0.000929912	0	0	0	0	0.000673433	0.000706311	0.000700797	0.000707664			0.000363953	0.000519126	0.000454447	0.000550447	0	0	0	0	0.000328559	0.00032739	0.000351673	0.000327401
	0.000747995	0.00100033	0.000954241	0.000843777	0	0	0	0	0.000611113	0.000640949	0.000635945	0.000642177			0.000320942	0.000461865	0.000403317	0.000491004	0	0	0	0	0.000291681	0.000290643	0.000312201	0.000290653
	0.000675915	0.000910414	0.000867716	0.000764782	0	0	0	0	0.000553955	0.000581	0.000576464	0.000582113			0.0002826	0.000410361	0.000357446	0.000437402	0	0	0	0	0.000258585	0.000257664	0.000276776	0.000257673
	0.000610091	0.000827709	0.000788201	0.000692424	0	0	0	0	0.000501593	0.000526082	0.000521975	0.00052709			0.000248476	0.000364103	0.000316355	0.000389137	0	0	0	0	0.000228927	0.000228112	0.000245032	0.00022812
	0.000550056	0.000751727	0.000715215	0.000626225	0	0	0	0	0.000453684	0.000475834	0.000472119	0.000476746			0.000218153	0.00032262	0.0002796	0.00034574	0	0	0	0	0.000202391	0.000201671	0.000216629	0.000201678
	0.000495369	0.000682002	0.000648301	0.000565734	0	0	0	0	0.000409902	0.000429914	0.000426558	0.000430738			0.00019125	0.000285474	0.000246775	0.000306777	0	0	0	0	0.000178684	0.000178048	0.000191254	0.000178054
	0.000445615	0.000618094	0.000587025	0.000510528	0	0	0	0	0.00036994	0.000388002	0.000384972	0.000388745			0.00016742	0.000252262	0.000217502	0.000271845	0	0	0	0	0.000157536	0.000156975	0.000168618	0.000156981
	0.000400407	0.000559585	0.000530978	0.000460203	0	0	0	0	0.000333509	0.000349792	0.000347061	0.000350462			0.000146345	0.000222609	0.000191437	0.000240572	0	0	0	0	0.000138699	0.000138205	0.000148456	0.00013821
	0.000359378	0.000506082	0.000479775	0.000414386	0	0	0	0	0.000300337	0.000315	0.000312541	0.000315604			0.000127736	0.000196175	0.000168263	0.000212615	0	0	0	0	0.000121946	0.000121512	0.000130525	0.000121516
	0.00032219	0.000457214	0.00043305	0.000372721	0	0	0	0	0.000270169	0.000283359	0.000281147	0.000283902			0.000111331	0.000172644	0.00014769	0.00018766	0	0	0	0	0.000107068	0.000106687	0.0001146	0.000106691
	0.000288524	0.00041263	0.000390462	0.000334878	0	0	0	0	0.000242765	0.000254617	0.000252629	0.000255105			9.68904e-05	0.000151729	0.000129454	0.000165414	0	0	0	0	9.38756e-05	9.35414e-05	0.00010048	9.35447e-05
	0.000258084	0.000372002	0.00035169	0.000300548	0	0	0	0	0.000217902	0.00022854	0.000226756	0.000228978			8.41999e-05	0.000133166	0.000113312	0.000145613	0	0	0	0	8.21951e-05	8.19024e-05	8.79775e-05	8.19053e-05
	0.000230595	0.000335021	0.000316433	0.000269442	0	0	0	0	0.000195371	0.00020491	0.00020331	0.000205302			7.30646e-05	0.000116715	9.90463e-05	0.000128012	0	0	0	0	7.18685e-05	7.16126e-05	7.69244e-05	7.16151e-05
	0.000205801	0.0003014	0.000284409	0.000241291	0	0	0	0	0.000174979	0.000183522	0.000182089	0.000183873			6.33093e-05	0.000102157	8.6457e-05	0.000112391	0	0	0	0	6.27525e-05	6.25291e-05	6.71671e-05	6.25313e-05
	0.000183466	0.000270867	0.000255356	0.000215844	0	0	0	0	0.000156544	0.000164186	0.000162905	0.000164501			5.47763e-05	8.92935e-05	7.53636e-05	9.85451e-05	0	0	0	0	5.47172e-05	5.45223e-05	5.85665e-05	5.45243e-05
	0.00016337	0.000243172	0.000229027	0.000192869	0	0	0	0	0.000139897	0.000146727	0.000145582	0.000147009			4.73241e-05	7.79433e-05	6.56029e-05	8.62909e-05	0	0	0	0	4.76448e-05	4.74752e-05	5.09966e-05	4.74769e-05
	0.000145311	0.000218079	0.000205196	0.000172152	0	0	0	0	0.000124885	0.000130982	0.000129959	0.000131233			4.08261e-05	6.79431e-05	5.70275e-05	7.54607e-05	0	0	0	0	4.14293e-05	4.12818e-05	4.43439e-05	4.12833e-05
	0.000129103	0.00019537	0.000183651	0.000153491	0	0	0	0	0.000111361	0.000116798	0.000115886	0.000117022			3.51688e-05	5.91453e-05	4.95046e-05	6.59026e-05	0	0	0	0	3.59749e-05	3.58468e-05	3.85057e-05	3.58481e-05
	0.000114573	0.000174841	0.000164193	0.000136703	0	0	0	0	9.91931e-05	0.000104036	0.000103224	0.000104235			3.02512e-05	5.14166e-05	4.29147e-05	5.74791e-05	0	0	0	0	3.11955e-05	3.10844e-05	3.339e-05	3.10855e-05
	0.000101564	0.000156305	0.000146642	0.000121618	0	0	0	0	8.82582e-05	9.25671e-05	9.18445e-05	9.27445e-05			2.59832e-05	4.4637e-05	3.71507e-05	5.0066e-05	0	0	0	0	2.70136e-05	2.69174e-05	2.8914e-05	2.69184e-05
	8.99296e-05	0.000139587	0.000130828	0.000108079	0	0	0	0	7.84428e-05	8.22725e-05	8.16303e-05	8.24302e-05			2.22847e-05	3.86986e-05	3.21164e-05	4.35513e-05	0	0	0	0	2.33601e-05	2.32769e-05	2.50034e-05	2.32777e-05
	7.95385e-05	0.000124526	0.000116596	9.59426e-05	0	0	0	0	6.96428e-05	7.30429e-05	7.24727e-05	7.31829e-05			1.90848e-05	3.35045e-05	2.7726e-05	3.78343e-05	0	0	0	0	2.01728e-05	2.01009e-05	2.15919e-05	2.01016e-05
	7.02687e-05	0.000110974	0.000103803	8.50754e-05	0	0	0	0	6.17624e-05	6.47777e-05	6.4272e-05	6.49019e-05			1.63204e-05	2.89681e-05	2.39028e-05	3.28243e-05	0	0	0	0	1.73963e-05	1.73343e-05	1.86201e-05	1.7335e-05
	6.20091e-05	9.87921e-05	9.2315e-05	7.53565e-05	0	0	0	0	5.47138e-05	5.7385e-05	5.6937e-05	5.7495e-05			1.39361e-05	2.50118e-05	2.05782e-05	2.84402e-05	0	0	0	0	1.49812e-05	1.49279e-05	1.60351e-05	1.49284e-05
	5.46587e-05	8.78551e-05	8.20118e-05	6.66747e-05	0	0	0	0	4.84165e-05	5.07803e-05	5.03839e-05	5.08777e-05			1.18827e-05	2.15664e-05	1.76916e-05	2.4609e-05	0	0	0	0	1.28836e-05	1.28377e-05	1.379e-05	1.28382e-05
	4.81251e-05	7.80469e-05	7.27814e-05	5.89286e-05	0	0	0	0	4.27972e-05	4.48867e-05	4.45363e-05	4.49727e-05			1.01171e-05	1.85703e-05	1.51889e-05	2.12658e-05	0	0	0	0	1.10644e-05	1.1025e-05	1.18428e-05	1.10254e-05
	4.23248e-05	6.92607e-05	6.45216e-05	5.20253e-05	0	0	0	0	3.77888e-05	3.96337e-05	3.93243e-05	3.97096e-05			8.60118e-06	1.59687e-05	1.30223e-05	1.83524e-05	0	0	0	0	9.48896e-06	9.45517e-06	1.01565e-05	9.45551e-06
	3.71815e-05	6.1399e-05	5.71387e-05	4.58805e-05	0	0	0	0	3.33299e-05	3.49571e-05	3.46842e-05	3.50241e-05			7.30175e-06	1.37128e-05	1.11493e-05	1.58173e-05	0	0	0	0	8.12659e-06	8.09766e-06	8.6983e-06	8.09795e-06
	3.26263e-05	5.43725e-05	5.0547e-05	4.04171e-05	0	0	0	0	2.9365e-05	3.07987e-05	3.05583e-05	3.08577e-05			6.18958e-06	1.17596e-05	9.53247e-06	1.36144e-05	0	0	0	0	6.95022e-06	6.92547e-06	7.43916e-06	6.92572e-06
	2.85969e-05	4.80995e-05	4.46684e-05	3.55653e-05	0	0	0	0	2.58435e-05	2.71052e-05	2.68936e-05	2.71572e-05			5.23914e-06	1.00709e-05	8.13887e-06	1.17027e-05	0	0	0	0	5.93592e-06	5.91479e-06	6.35351e-06	5.915e-06
	2.50369e-05	4.25054e-05	3.94317e-05	3.12616e-05	0	0	0	0	2.27194e-05	2.38286e-05	2.36426e-05	2.38743e-05			4.42816e-06	8.61294e-06	6.93942e-06	1.00462e-05	0	0	0	0	5.06265e-06	5.04462e-06	5.4188e-06	5.0448e-06
	2.18953e-05	3.75225e-05	3.47721e-05	2.74487e-05	0	0	0	0	1.99512e-05	2.09252e-05	2.07619e-05	2.09653e-05			3.73725e-06	7.35602e-06	5.90856e-06	8.61281e-06	0	0	0	0	4.31188e-06	4.29653e-06	4.61522e-06	4.29668e-06
	1.91263e-05	3.30889e-05	3.06307e-05	2.40744e-05	0	0	0	0	1.7501e-05	1.83555e-05	1.82122e-05	1.83906e-05			3.14953e-06	6.27397e-06	5.02389e-06	7.37416e-06	0	0	0	0	3.66738e-06	3.65433e-06	3.92538e-06	3.65446e-06
	1.66886e-05	2.91484e-05	2.6954e-05	2.10917e-05	0	0	0	0	1.5335e-05	1.60837e-05	1.59581e-05	1.61145e-05			2.65036e-06	5.3438e-06	4.26578e-06	6.3053e-06	0	0	0	0	3.11491e-06	3.10382e-06	3.33404e-06	3.10393e-06
	1.45451e-05	2.56503e-05	2.36935e-05	1.84584e-05	0	0	0	0	1.34224e-05	1.40777e-05	1.39678e-05	1.41046e-05			2.22704e-06	4.54534e-06	3.61706e-06	5.38424e-06	0	0	0	0	2.64201e-06	2.6326e-06	2.82787e-06	2.63269e-06
	1.26627e-05	2.25482e-05	2.08054e-05	1.61362e-05	0	0	0	0	1.17354e-05	1.23084e-05	1.22123e-05	1.2332e-05			1.8686e-06	3.86092e-06	3.06277e-06	4.59165e-06	0	0	0	0	2.23781e-06	2.22984e-06	2.39524e-06	2.22992e-06
	1.10115e-05	1.98004e-05	1.825e-05	1.40906e-05	0	0	0	0	1.02493e-05	1.07497e-05	1.06657e-05	1.07703e-05			1.56556e-06	3.27509e-06	2.58983e-06	3.91056e-06	0	0	0	0	1.89283e-06	1.88609e-06	2.02599e-06	1.88616e-06
	9.56472e-06	1.73692e-05	1.59915e-05	1.22909e-05	0	0	0	0	8.94154e-06	9.37808e-06	9.30487e-06	9.39605e-06			1.30974e-06	2.77437e-06	2.1869e-06	3.3261e-06	0	0	0	0	1.59882e-06	1.59313e-06	1.7113e-06	1.59318e-06
	8.29869e-06	1.52205e-05	1.39977e-05	1.07093e-05	0	0	0	0	7.79213e-06	8.17256e-06	8.10876e-06	8.18822e-06			1.09413e-06	2.34701e-06	1.84411e-06	2.82525e-06	0	0	0	0	1.34861e-06	1.34381e-06	1.44349e-06	1.34386e-06
	7.1921e-06	1.33236e-05	1.22395e-05	9.32106e-06	0	0	0	0	6.78305e-06	7.11421e-06	7.05867e-06	7.12785e-06			9.12678e-07	1.98277e-06	1.5529e-06	2.39665e-06	0	0	0	0	1.13599e-06	1.13195e-06	1.21591e-06	1.13199e-06
	6.22604e-06	1.16509e-05	1.06909e-05	8.10386e-06	0	0	0	0	5.89819e-06	6.18615e-06	6.13785e-06	6.198e-06			7.60204e-07	1.67278e-06	1.30587e-06	2.03038e-06	0	0	0	0	9.55572e-07	9.5217e-07	1.0228e-06	9.52204e-07
	5.38367e-06	1.01774e-05	9.32825e-06	7.03789e-06	0	0	0	0	5.12315e-06	5.37327e-06	5.33132e-06	5.38357e-06			6.32278e-07	1.40933e-06	1.09662e-06	1.71782e-06	0	0	0	0	8.02696e-07	7.99838e-07	8.59165e-07	7.99866e-07
	4.65e-06	8.88092e-06	8.13071e-06	6.10545e-06	0	0	0	0	4.44508e-06	4.6621e-06	4.6257e-06	4.67104e-06			5.2511e-07	1.18575e-06	9.19632e-07	1.45145e-06	0	0	0	0	6.73346e-07	6.70949e-07	7.20716e-07	6.70973e-07
	4.01179e-06	7.74146e-06	7.07941e-06	5.29074e-06	0	0	0	0	3.85255e-06	4.04063e-06	4.00909e-06	4.04838e-06			4.3547e-07	9.9629e-07	7.70142e-07	1.22476e-06	0	0	0	0	5.64061e-07	5.62052e-07	6.03742e-07	5.62072e-07
	3.45727e-06	6.7411e-06	6.15751e-06	4.57973e-06	0	0	0	0	3.33534e-06	3.49818e-06	3.47087e-06	3.50488e-06			3.60604e-07	8.35959e-07	6.44061e-07	1.03212e-06	0	0	0	0	4.7186e-07	4.7018e-07	5.05055e-07	4.70196e-07
	2.97603e-06	5.86384e-06	5.35e-06	3.95992e-06	0	0	0	0	2.88441e-06	3.02524e-06	3.00162e-06	3.03104e-06			2.98172e-07	7.00474e-07	5.37877e-07	8.68621e-07	0	0	0	0	3.94185e-07	3.92781e-07	4.21915e-07	3.92795e-07
	2.55888e-06	5.09538e-06	4.64348e-06	3.42025e-06	0	0	0	0	2.49172e-06	2.61337e-06	2.59297e-06	2.61838e-06			2.46189e-07	5.86149e-07	4.48579e-07	7.30059e-07	0	0	0	0	3.28841e-07	3.27671e-07	3.51975e-07	3.27682e-07
	2.19773e-06	4.42297e-06	4.02599e-06	2.95089e-06	0	0	0	0	2.15014e-06	2.25511e-06	2.23751e-06	2.25944e-06			2.02972e-07	4.89815e-07	3.7359e-07	6.12789e-07	0	0	0	0	2.73951e-07	2.72976e-07	2.93223e-07	2.72985e-07
	1.88541e-06	3.83526e-06	3.48692e-06	2.54316e-06	0	0	0	0	1.85335e-06	1.94384e-06	1.92866e-06	1.94756e-06			1.67097e-07	4.08756e-07	3.10707e-07	5.13677e-07	0	0	0	0	2.27908e-07	2.27096e-07	2.43941e-07	2.27104e-07
	1.61565e-06	3.32214e-06	3.01684e-06	2.18936e-06	0	0	0	0	1.59579e-06	1.6737e-06	1.66063e-06	1.6769e-06			1.37362e-07	3.40647e-07	2.58051e-07	4.30026e-07	0	0	0	0	1.89341e-07	1.88667e-07	2.02661e-07	1.88674e-07
	1.38293e-06	2.87465e-06	2.60736e-06	1.88271e-06	0	0	0	0	1.37251e-06	1.43952e-06	1.42828e-06	1.44228e-06			1.12753e-07	2.83501e-07	2.14023e-07	3.59522e-07	0	0	0	0	1.57084e-07	1.56525e-07	1.68135e-07	1.5653e-07
	1.18239e-06	2.48482e-06	2.25108e-06	1.61725e-06	0	0	0	0	1.17919e-06	1.23675e-06	1.2271e-06	1.23913e-06			9.24174e-08	2.3562e-07	1.77262e-07	3.0018e-07	0	0	0	0	1.30142e-07	1.29679e-07	1.39297e-07	1.29683e-07
	1.00979e-06	2.1456e-06	1.94143e-06	1.38769e-06	0	0	0	0	1.01198e-06	1.06139e-06	1.0531e-06	1.06342e-06			7.56389e-08	1.95559e-07	1.46612e-07	2.50302e-07	0	0	0	0	1.07672e-07	1.07289e-07	1.15247e-07	1.07292e-07
	8.61416e-07	1.85074e-06	1.6726e-06	1.18941e-06	0	0	0	0	8.67537e-07	9.09892e-07	9.02789e-07	9.11636e-07			6.18161e-08	1.62088e-07	1.21095e-07	2.08435e-07	0	0	0	0	8.89587e-08	8.8642e-08	9.52169e-08	8.86451e-08
	7.34011e-07	1.59472e-06	1.43947e-06	1.01835e-06	0	0	0	0	7.42897e-07	7.79166e-07	7.73084e-07	7.8066e-07			5.04456e-08	1.34163e-07	9.98803e-08	1.73342e-07	0	0	0	0	7.33962e-08	7.31349e-08	7.85596e-08	7.31375e-08
	6.24744e-07	1.37267e-06	1.23753e-06	8.70933e-07	0	0	0	0	6.35468e-07	6.66492e-07	6.61289e-07	6.6777e-07			4.11064e-08	1.10898e-07	8.22686e-08	1.43967e-07	0	0	0	0	6.04726e-08	6.02573e-08	6.47269e-08	6.02595e-08
	5.31143e-07	1.1803e-06	1.06279e-06	7.44042e-07	0	0	0	0	5.42979e-07	5.69488e-07	5.65043e-07	5.7058e-07			3.34472e-08	9.15424e-08	6.76688e-08	1.19412e-07	0	0	0	0	4.97558e-08	4.95787e-08	5.32561e-08	4.95804e-08
	4.51056e-07	1.01382e-06	9.11753e-07	6.34942e-07	0	0	0	0	4.63445e-07	4.86071e-07	4.82276e-07	4.87002e-07			2.71754e-08	7.54622e-08	5.55831e-08	9.89143e-08	0	0	0	0	4.08817e-08	4.07361e-08	4.37577e-08	4.07375e-08
	3.82612e-07	8.69909e-07	7.81356e-07	5.41246e-07	0	0	0	0	3.95127e-07	4.14418e-07	4.11183e-07	4.15212e-07			2.20474e-08	6.21219e-08	4.55928e-08	8.18268e-08	0	0	0	0	3.35439e-08	3.34244e-08	3.59037e-08	3.34256e-08
	3.24187e-07	7.45639e-07	6.68899e-07	4.60871e-07	0	0	0	0	3.36513e-07	3.52942e-07	3.50186e-07	3.53618e-07			1.78609e-08	5.10703e-08	3.73465e-08	6.76017e-08	0	0	0	0	2.74851e-08	2.73873e-08	2.94187e-08	2.73882e-08
	2.74374e-07	6.3845e-07	5.72022e-07	3.92002e-07	0	0	0	0	2.86279e-07	3.00256e-07	2.97912e-07	3.00831e-07			1.44482e-08	4.19276e-08	3.05494e-08	5.57757e-08	0	0	0	0	2.24896e-08	2.24095e-08	2.40717e-08	2.24103e-08
	2.31953e-07	5.46096e-07	4.88658e-07	3.33059e-07	0	0	0	0	2.43278e-07	2.55156e-07	2.53164e-07	2.55645e-07			1.16705e-08	3.43748e-08	2.49549e-08	4.59577e-08	0	0	0	0	1.83766e-08	1.83112e-08	1.96694e-08	1.83118e-08
	1.95869e-07	4.66609e-07	4.17002e-07	2.82669e-07	0	0	0	0	2.0651e-07	2.16593e-07	2.14902e-07	2.17008e-07			9.41304e-09	2.81442e-08	2.03568e-08	3.78179e-08	0	0	0	0	1.49951e-08	1.49417e-08	1.605e-08	1.49423e-08
	1.65212e-07	3.98273e-07	3.55476e-07	2.3964e-07	0	0	0	0	1.75108e-07	1.83657e-07	1.82223e-07	1.84009e-07			7.58116e-09	2.30116e-08	1.6583e-08	3.10787e-08	0	0	0	0	1.22189e-08	1.21754e-08	1.30785e-08	1.21759e-08
	1.39196e-07	3.39588e-07	3.02708e-07	2.02939e-07	0	0	0	0	1.48318e-07	1.55559e-07	1.54344e-07	1.55857e-07			6.09686e-09	1.87893e-08	1.34901e-08	2.55067e-08	0	0	0	0	9.94299e-09	9.90759e-09	1.06425e-08	9.90794e-09
	1.17145e-07	2.89245e-07	2.575e-07	1.7167e-07	0	0	0	0	1.25489e-07	1.31616e-07	1.30588e-07	1.31868e-07			4.896e-09	1.53209e-08	1.09589e-08	2.09059e-08	0	0	0	0	8.07979e-09	8.05102e-09	8.6482e-09	8.05131e-09
	9.84754e-08	2.46107e-07	2.18812e-07	1.4506e-07	0	0	0	0	1.06058e-07	1.11236e-07	1.10367e-07	1.11449e-07			3.92592e-09	1.24757e-08	8.89038e-09	1.71124e-08	0	0	0	0	6.55667e-09	6.53333e-09	7.01793e-09	6.53356e-09
	8.26879e-08	2.09182e-07	1.85739e-07	1.22441e-07	0	0	0	0	8.95376e-08	9.3909e-08	9.31758e-08	9.4089e-08			3.14345e-09	1.01451e-08	7.20232e-09	1.39888e-08	0	0	0	0	5.31332e-09	5.29441e-09	5.68712e-09	5.2946e-09
	6.93531e-08	1.7761e-07	1.57499e-07	1.03235e-07	0	0	0	0	7.55079e-08	7.91943e-08	7.85761e-08	7.93461e-08			2.51325e-09	8.23863e-09	5.82672e-09	1.14202e-08	0	0	0	0	4.29981e-09	4.2845e-09	4.6023e-09	4.28465e-09
	5.81031e-08	1.50645e-07	1.33411e-07	8.69469e-08	0	0	0	0	6.36069e-08	6.67123e-08	6.61915e-08	6.68401e-08			2.00646e-09	6.68131e-09	4.70735e-09	9.31092e-09	0	0	0	0	3.47482e-09	3.46244e-09	3.71927e-09	3.46257e-09
	4.8623e-08	1.27639e-07	1.12888e-07	7.31483e-08	0	0	0	0	5.3523e-08	5.61361e-08	5.56979e-08	5.62437e-08			1.59952e-09	5.41099e-09	3.79776e-09	7.5812e-09	0	0	0	0	2.80423e-09	2.79425e-09	3.00151e-09	2.79435e-09
	4.06438e-08	1.08033e-07	9.54204e-08	6.14722e-08	0	0	0	0	4.49885e-08	4.7185e-08	4.68166e-08	4.72754e-08			1.27326e-09	4.37623e-09	3.0597e-09	6.16465e-09	0	0	0	0	2.25994e-09	2.25189e-09	2.41892e-09	2.25197e-09
	3.39357e-08	9.13423e-08	8.05705e-08	5.16032e-08	0	0	0	0	3.77736e-08	3.96177e-08	3.93084e-08	3.96937e-08			1.01206e-09	3.53453e-09	2.46167e-09	5.00616e-09	0	0	0	0	1.81877e-09	1.8123e-09	1.94672e-09	1.81236e-09
	2.83027e-08	7.71492e-08	6.79596e-08	4.32712e-08	0	0	0	0	3.1681e-08	3.32277e-08	3.29683e-08	3.32914e-08			8.03267e-10	2.85083e-09	1.9778e-09	4.06001e-09	0	0	0	0	1.46171e-09	1.4565e-09	1.56454e-09	1.45656e-09
	2.35781e-08	6.50929e-08	5.7262e-08	3.62448e-08	0	0	0	0	2.6542e-08	2.78379e-08	2.76205e-08	2.78912e-08			6.36618e-10	2.29625e-09	1.58684e-09	3.28833e-09	0	0	0	0	1.17312e-09	1.16894e-09	1.25565e-09	1.16898e-09
	1.962e-08	5.48629e-08	4.81972e-08	3.03261e-08	0	0	0	0	2.22124e-08	2.32968e-08	2.31149e-08	2.33415e-08			5.03806e-10	1.84704e-09	1.2714e-09	2.6598e-09	0	0	0	0	9.40208e-10	9.3686e-10	1.00635e-09	9.36893e-10
	1.6308e-08	4.61921e-08	4.05245e-08	2.53461e-08	0	0	0	0	1.85686e-08	1.94752e-08	1.93231e-08	1.95125e-08			3.98119e-10	1.48368e-09	1.01726e-09	2.14856e-09	0	0	0	0	7.52498e-10	7.49819e-10	8.05436e-10	7.49845e-10
	1.35397e-08	3.88508e-08	3.40372e-08	2.11607e-08	0	0	0	0	1.55056e-08	1.62626e-08	1.61357e-08	1.62938e-08			3.14142e-10	1.19018e-09	8.12801e-10	1.7333e-09	0	0	0	0	6.01432e-10	5.99291e-10	6.43742e-10	5.99312e-10
	1.12287e-08	3.26418e-08	2.85581e-08	1.76471e-08	0	0	0	0	1.29337e-08	1.35652e-08	1.34593e-08	1.35912e-08			2.47517e-10	9.53444e-10	6.48537e-10	1.39645e-09	0	0	0	0	4.80029e-10	4.7832e-10	5.13799e-10	4.78337e-10
	9.3016e-09	2.73963e-08	2.39357e-08	1.47008e-08	0	0	0	0	1.07766e-08	1.13028e-08	1.12145e-08	1.13244e-08			1.94737e-10	7.62755e-10	5.16755e-10	1.12357e-09	0	0	0	0	3.82603e-10	3.81241e-10	4.09519e-10	3.81254e-10
	7.69655e-09	2.29696e-08	2.00402e-08	1.2233e-08	0	0	0	0	8.96949e-09	9.40739e-09	9.33395e-09	9.42543e-09			1.52988e-10	6.09373e-10	4.11182e-10	9.02823e-10	0	0	0	0	3.04529e-10	3.03445e-10	3.25953e-10	3.03456e-10
	6.36127e-09	1.92379e-08	1.6761e-08	1.01683e-08	0	0	0	0	7.45721e-09	7.82129e-09	7.76023e-09	7.83628e-09			1.20014e-10	4.86171e-10	3.26726e-10	7.24487e-10	0	0	0	0	2.42052e-10	2.41191e-10	2.59081e-10	2.41199e-10
	5.25172e-09	1.60955e-08	1.40035e-08	8.44281e-09	0	0	0	0	6.19313e-09	6.49549e-09	6.44478e-09	6.50794e-09			9.40092e-11	3.8735e-10	2.59259e-10	5.8061e-10	0	0	0	0	1.92128e-10	1.91444e-10	2.05644e-10	1.9145e-10
	4.3308e-09	1.34523e-08	1.16873e-08	7.00246e-09	0	0	0	0	5.1377e-09	5.38853e-09	5.34646e-09	5.39886e-09			7.35316e-11	3.08196e-10	2.05439e-10	4.64691e-10	0	0	0	0	1.5229e-10	1.51747e-10	1.63003e-10	1.51753e-10
	3.56735e-09	1.12313e-08	9.74386e-09	5.80148e-09	0	0	0	0	4.25747e-09	4.46533e-09	4.43047e-09	4.47389e-09			5.74305e-11	2.44882e-10	1.62567e-10	3.71423e-10	0	0	0	0	1.20545e-10	1.20116e-10	1.29026e-10	1.2012e-10
	2.93516e-09	9.36713e-09	8.11501e-09	4.80121e-09	0	0	0	0	3.5242e-09	3.69625e-09	3.6674e-09	3.70334e-09			4.47895e-11	1.94311e-10	1.28464e-10	2.96483e-10	0	0	0	0	9.52861e-11	9.49469e-11	1.01989e-10	9.49502e-11
	2.41228e-09	7.80417e-09	6.75129e-09	3.96905e-09	0	0	0	0	2.91402e-09	3.05629e-09	3.03243e-09	3.06215e-09			3.48798e-11	1.53973e-10	1.01375e-10	2.36351e-10	0	0	0	0	7.52158e-11	7.4948e-11	8.05073e-11	7.49507e-11
	1.98031e-09	6.49516e-09	5.6108e-09	3.27753e-09	0	0	0	0	2.40686e-09	2.52436e-09	2.50466e-09	2.5292e-09			2.7123e-11	1.21843e-10	7.98875e-11	1.88165e-10	0	0	0	0	5.9291e-11	5.90799e-11	6.34621e-11	5.9082e-11
	1.62385e-09	5.40003e-09	4.65804e-09	2.70353e-09	0	0	0	0	1.98579e-09	2.08274e-09	2.06648e-09	2.08673e-09			2.10603e-11	9.62865e-11	6.28677e-11	1.49605e-10	0	0	0	0	4.66732e-11	4.65071e-11	4.99567e-11	4.65087e-11
	1.33006e-09	4.48482e-09	3.86298e-09	2.22761e-09	0	0	0	0	1.63659e-09	1.71649e-09	1.70309e-09	1.71978e-09			1.63289e-11	7.59868e-11	4.94055e-11	1.1879e-10	0	0	0	0	3.669e-11	3.65593e-11	3.92711e-11	3.65606e-11
	1.08819e-09	3.72081e-09	3.20023e-09	1.83346e-09	0	0	0	0	1.34732e-09	1.4131e-09	1.40207e-09	1.41581e-09			1.2642e-11	5.98851e-11	3.87725e-11	9.41978e-11	0	0	0	0	2.88022e-11	2.86997e-11	3.08285e-11	2.87007e-11
	8.89301e-10	3.08371e-09	2.64838e-09	1.5074e-09	0	0	0	0	1.10797e-09	1.16206e-09	1.15299e-09	1.16429e-09			9.77324e-12	4.71312e-11	3.03859e-11	7.45978e-11	0	0	0	0	2.2579e-11	2.24986e-11	2.41674e-11	2.24994e-11
	7.25942e-10	2.55301e-09	2.18937e-09	1.23797e-09	0	0	0	0	9.10142e-10	9.54577e-10	9.47125e-10	9.56407e-10			7.54442e-12	3.7043e-11	2.37804e-11	5.89979e-11	0	0	0	0	1.7676e-11	1.7613e-11	1.89195e-11	1.76137e-11
	5.91922e-10	2.11142e-09	1.808e-09	1.01558e-09	0	0	0	0	7.46819e-10	7.8328e-10	7.77165e-10	7.84781e-10			5.81539e-12	2.90745e-11	1.85852e-11	4.65987e-11	0	0	0	0	1.38185e-11	1.37693e-11	1.47907e-11	1.37698e-11
	4.821e-10	1.74438e-09	1.49148e-09	8.32229e-10	0	0	0	0	6.12134e-10	6.42019e-10	6.37007e-10	6.4325e-10			4.47606e-12	2.2789e-11	1.45049e-11	3.67567e-11	0	0	0	0	1.0788e-11	1.07496e-11	1.15469e-11	1.07499e-11
	3.9221e-10	1.43962e-09	1.22907e-09	6.81234e-10	0	0	0	0	5.01189e-10	5.25658e-10	5.21555e-10	5.26666e-10			3.44016e-12	1.78381e-11	1.13048e-11	2.8955e-11	0	0	0	0	8.41042e-12	8.38048e-12	9.00209e-12	8.38078e-12
	3.1872e-10	1.18686e-09	1.01176e-09	5.57023e-10	0	0	0	0	4.09904e-10	4.29916e-10	4.2656e-10	4.3074e-10			2.64013e-12	1.39437e-11	8.7985e-12	2.27792e-11	0	0	0	0	6.5478e-12	6.52449e-12	7.00844e-12	6.52472e-12
	2.58708e-10	9.77449e-10	8.31992e-10	4.54961e-10	0	0	0	0	3.34879e-10	3.51228e-10	3.48486e-10	3.51901e-10			2.02319e-12	1.08847e-11	6.83841e-12	1.78969e-11	0	0	0	0	5.09065e-12	5.07253e-12	5.44878e-12	5.07271e-12
	2.09759e-10	8.04141e-10	6.83439e-10	3.71193e-10	0	0	0	0	2.73286e-10	2.86628e-10	2.84391e-10	2.87178e-10			1.54816e-12	8.48527e-12	5.30765e-12	1.40425e-11	0	0	0	0	3.95231e-12	3.93824e-12	4.23035e-12	3.93838e-12
	1.69879e-10	6.60865e-10	5.60816e-10	3.02517e-10	0	0	0	0	2.22778e-10	2.33654e-10	2.3183e-10	2.34102e-10			1.18292e-12	6.60574e-12	4.11385e-12	1.10036e-11	0	0	0	0	3.06428e-12	3.05337e-12	3.27985e-12	3.05348e-12
	1.37426e-10	5.42546e-10	4.59707e-10	2.46277e-10	0	0	0	0	1.81406e-10	1.90263e-10	1.88777e-10	1.90627e-10			9.02534e-13	5.13553e-12	3.18416e-12	8.61095e-12	0	0	0	0	2.37249e-12	2.36405e-12	2.5394e-12	2.36413e-12
	1.11048e-10	4.44943e-10	3.76429e-10	2.00272e-10	0	0	0	0	1.47556e-10	1.5476e-10	1.53551e-10	1.55056e-10			6.87599e-13	3.9871e-12	2.46117e-12	6.72967e-12	0	0	0	0	1.83435e-12	1.82782e-12	1.9634e-12	1.82788e-12
	8.96309e-11	3.64514e-10	3.0791e-10	1.62683e-10	0	0	0	0	1.1989e-10	1.25744e-10	1.24762e-10	1.25985e-10			5.23084e-13	3.09128e-12	1.89971e-12	5.25245e-12	0	0	0	0	1.41631e-12	1.41127e-12	1.51595e-12	1.41132e-12
	7.2263e-11	2.9831e-10	2.51597e-10	1.32005e-10	0	0	0	0	9.73058e-11	1.02056e-10	1.0126e-10	1.02252e-10			3.9735e-13	2.39346e-12	1.46431e-12	4.09408e-12	0	0	0	0	1.09203e-12	1.08814e-12	1.16886e-12	1.08818e-12
	5.81948e-11	2.43873e-10	2.05366e-10	1.06994e-10	0	0	0	0	7.88891e-11	8.27406e-11	8.20947e-11	8.28992e-11			3.01398e-13	1.85065e-12	1.12714e-12	3.18695e-12	0	0	0	0	8.40837e-13	8.37844e-13	8.9999e-13	8.37873e-13
	4.68124e-11	1.99161e-10	1.67452e-10	8.66271e-11	0	0	0	0	6.38882e-11	6.70073e-11	6.64842e-11	6.71357e-11			2.28282e-13	1.42899e-12	8.66411e-13	2.47754e-12	0	0	0	0	6.46529e-13	6.44227e-13	6.92012e-13	6.4425e-13
	3.76139e-11	1.62475e-10	1.36393e-10	7.00603e-11	0	0	0	0	5.16831e-11	5.42063e-11	5.37832e-11	5.43102e-11			1.7265e-13	1.1019e-12	6.65073e-13	1.9235e-12	0	0	0	0	4.96437e-13	4.9467e-13	5.31361e-13	4.94687e-13
	3.01887e-11	1.32408e-10	1.10978e-10	5.65997e-11	0	0	0	0	4.17639e-11	4.38029e-11	4.34609e-11	4.38869e-11			1.30385e-13	8.48526e-13	5.09817e-13	1.49138e-12	0	0	0	0	3.80663e-13	3.79307e-13	4.07442e-13	3.79321e-13
	2.42019e-11	1.07791e-10	9.02024e-11	4.56753e-11	0	0	0	0	3.37116e-11	3.53574e-11	3.50814e-11	3.54252e-11			9.83228e-14	6.52523e-13	3.90265e-13	1.15481e-12	0	0	0	0	2.91485e-13	2.90447e-13	3.11991e-13	2.90457e-13
	1.93805e-11	8.76586e-11	7.32388e-11	3.6819e-11	0	0	0	0	2.7182e-11	2.85091e-11	2.82865e-11	2.85637e-11			7.40364e-14	5.01112e-13	2.98335e-13	8.93018e-13	0	0	0	0	2.2289e-13	2.22097e-13	2.38571e-13	2.22105e-13
	1.55021e-11	7.12115e-11	5.94024e-11	2.96474e-11	0	0	0	0	2.18932e-11	2.2962e-11	2.27828e-11	2.3006e-11			5.56674e-14	3.8431e-13	2.27745e-13	6.89658e-13	0	0	0	0	1.70203e-13	1.69597e-13	1.82177e-13	1.69603e-13
	1.23858e-11	5.77894e-11	4.81291e-11	2.38466e-11	0	0	0	0	1.76141e-11	1.8474e-11	1.83298e-11	1.85094e-11			4.17948e-14	2.94331e-13	1.73617e-13	5.31905e-13	0	0	0	0	1.2979e-13	1.29328e-13	1.38921e-13	1.29333e-13
	9.88483e-12	4.68479e-11	3.8954e-11	1.91597e-11	0	0	0	0	1.41559e-11	1.4847e-11	1.47311e-11	1.48754e-11			3.13334e-14	2.25113e-13	1.32171e-13	4.09694e-13	0	0	0	0	9.88364e-14	9.84845e-14	1.0579e-13	9.8488e-14
	7.87994e-12	3.79381e-11	3.14946e-11	1.53772e-11	0	0	0	0	1.13642e-11	1.1919e-11	1.1826e-11	1.19418e-11			2.34562e-14	1.71938e-13	1.0048e-13	3.15145e-13	0	0	0	0	7.51609e-14	7.48933e-14	8.04484e-14	7.48959e-14

## Sheet: Figure5_E_F
PhenM_single_Apo_R	PhenM_single_Apo_Sig	PhenM_single_cAMP_R	PhenM_single_cAMP_Sig	PhenM_single_cGMP_R	PhenM_single_cGMP_Sig			RuBpy_single_Apo_R	RuBpy_single_Apo_Sig	RuBpy_single_cAMP_R	RuBpy_single_cAMP_Sig	RuBpy_single_cGMP_R	RuBpy_single_cGMP_Sig
39.5544	5.9515	29.3138	0.71	34.6846	8.37083			40.1	5.23	29.2966	1.18	33.7047	11.7256
39.5934	6.1664	29.5339	0.07	35.6274	7.72024			40.1434	5.4184	29.5	1.02	33.5649	11.9071
39.5431	6.14679	29.3539	1.08	35.4244	8.18			40.0264	5.38	29.4755	0.82	36.0082	10.0941
39.5586	6.04189	29.4473	1.26	35.3205	9.37111			40.0155	5.5	29.5541	0.62	34.0222	11.0012
Avg_FePhenM_Apo_R	Avg_FePhenM_Apo_Sig	Avg_FePhenM_cAMP_R	Avg_FePhenM_cAMP_Sig	Avg_FePhenM_cGMP_R	Avg_FePhenM_cGMP_Sig			Avg_RuBpy_Apo_R	Avg_RuBpy_Apo_Sig	Avg_RuBpy_cAMP_R	Avg_RuBpy_cAMP_Sig	Avg_RuBpy_cGMP_R	Avg_RuBpy_cGMP_Sig
39.552	6.04673	29.3717	1.01682	35.2642	8.41124			40.0703	5.37936	29.4442	0.907083	34.325	11.182
